# Supplementary material for: Phosphine- and water-promoted pentannulative aldol reaction
Source: Royal Society of Chemistry journal article supplement (doi:10.1039/c8ob03106a), 2019-01-01

## Supporting Information

### Phosphine- and water-promoted pentannulative aldol reaction

Bishnupada Satpathi, Lona Dutta, and S. S. V. Ramasastry\*

*Organic Synthesis and Catalysis Lab, Department of Chemical Sciences, Indian Institute of Science Education and Research (IISER) Mohali, Sector 81, S A S Nagar, Manauli PO, Punjab 140306, INDIA*

*E-mail: ramsastry@iisermohali.ac.in*

| S. No | Contents                                                                                                | Page no |
|-------|---------------------------------------------------------------------------------------------------------|---------|
| 1     | General experimental methods                                                                            | S2      |
| 2     | General procedure-1: Synthesis of the dienones-ketones <b>4a-e</b> , <b>4g-j</b> and <b>4m-n</b>        | S3      |
| 3     | General procedure-2: Syntheses of the dienone-ketones <b>4l</b> and <b>4o</b>                           | S4      |
| 4     | General procedure-3: Optimization of the reaction parameters for <b>4a</b>                              | S6      |
| 5     | General procedure-4: Evaluating the substrate scope for <b>5</b>                                        | S6      |
| 6     | Efforts to gain mechanistic insight of aldol reaction                                                   | S7      |
| 7     | Evidence that favours Lewis basic character of $\text{PBU}_3$                                           | S11     |
| 8     | Spectroscopic data of the newly synthesized compounds during this study                                 | S12     |
| 9     | Crystal structure of racemic <b>5m</b> (CCDC 1865325)                                                   | S24     |
| 10    | Copies of $^1\text{H}$ and $^{13}\text{C}$ -NMR spectra of all the new compounds reported in this study | S26     |

**General experimental methods:** All the starting compounds and catalysts employed in this study were procured from Sigma-Aldrich, Avra Chemicals and were used without further purification. For thin layer chromatography (TLC), silica aluminium foils with fluorescent indicator 254 nm (from Aldrich) were used and compounds were visualized by irradiation with UV light and/or by treatment with a solution of *p*-anisaldehyde (23 mL), conc. H<sub>2</sub>SO<sub>4</sub> (35 mL), and acetic acid (10 mL) in ethanol (900 mL) followed by heating. Column chromatography was performed using SD Fine silica gel 60-120 mesh (approximately 15–20 g per 1 g of the crude product). Dry THF was obtained by distillation over sodium and stored over sodium wire. IR spectra were recorded on a Perkin–Elmer FT IR spectrometer as thin films or KBr pellet, as indicated, with  $\nu_{\max}$  in inverse centimetres. Melting points were recorded on a digital melting point apparatus Stuart SMP30 and were uncorrected. <sup>1</sup>H NMR and <sup>13</sup>C NMR spectra were recorded on a 400 MHz Bruker Biospin Avance III FT-NMR spectrometer. NMR shifts are reported as delta ( $\delta$ ) units in parts per million (ppm) and coupling constants (*J*) are reported in Hertz (Hz). The following abbreviations are utilized to describe peak patterns when appropriate: br = broad, s = singlet, d = doublet, t = triplet, q = quartet and m = multiplet. Proton chemical shifts are given in  $\delta$  relative to tetramethylsilane ( $\delta$  0.00 ppm) in CDCl<sub>3</sub> (7.26 ppm) or in (CD<sub>3</sub>)<sub>2</sub>SO ( $\delta$  2.50 ppm). Carbon chemical shifts are internally referenced to the deuterated solvent signals in CDCl<sub>3</sub> ( $\delta$  77.1 ppm) or in (CD<sub>3</sub>)<sub>2</sub>SO ( $\delta$  39.5 ppm). Single crystal X-ray analysis was carried on a Bruker AXS KAPPA APEX II system. High-resolution mass spectra were recorded on a Waters QTOF mass spectrometer.

### General procedure-1: Syntheses of the dienone-ketones 4a-e, 4g-j and 4m-n.

The dienones (**4a-e**, **4g-j** and **4m-n**) employed in this study were prepared as in Scheme 1S. *n*-Butyllithium reaction 2-bromobenzyl alcohols **B** followed by alkylation with an appropriate dienal **E** generated diols **F**. IBX oxidation of the diols **F** led to the formation of dienone-ketones **4**.

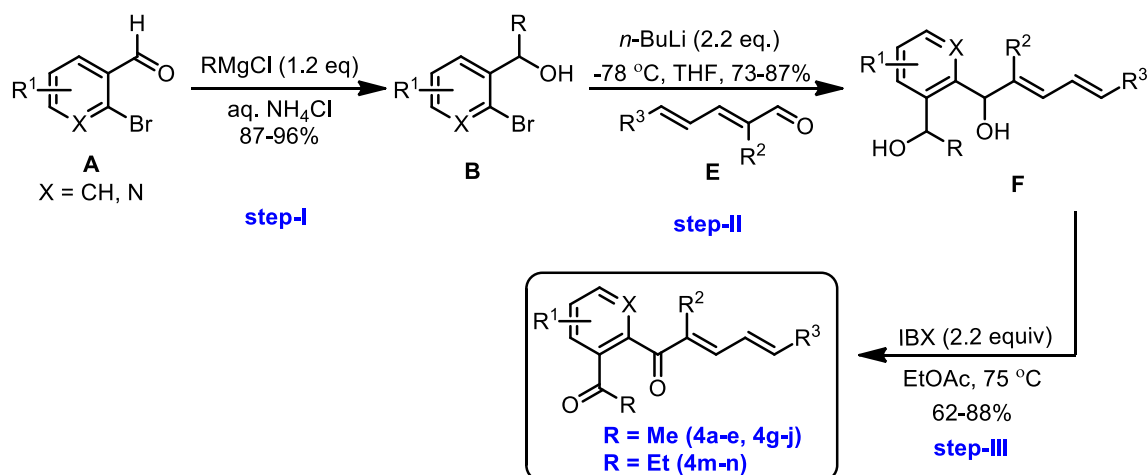

**Scheme 1S.** Syntheses of the dienones **4a-e**, **4g-j** and **4m-n**.

**Representative procedure for step-I (Scheme 1S):** To an oven dried 25 mL RB flask, 2-bromobenzaldehyde **A** (2.0 mmol) and anhydrous THF (10 mL) were added. Appropriate Grignar reagent (2.4 mmol) at 0 °C under nitrogen atmosphere and continued stirring at room temperature until **A** disappeared (as monitored by TLC). The reaction mixture was quenched with saturated aq. NH<sub>4</sub>Cl and extracted with ethyl acetate. Organic extracts were combined and dried over anhydrous sodium sulphate and concentrated to afford 2-bromo alcohol **B**. The crude reaction mixture was taken forward to the next step without further purification.

**Representative procedure for step-II (Scheme 1S):**<sup>1</sup> An oven dried 25 mL long neck RB flask was charged with 2-bromobenzyl alcohol **B** (1.0 mmol), dry THF (5 mL) and placed at -78 °C. *n*-BuLi (1.6 M in hexanes, 2.2 mmol) was added drop wise at the same temperature and stirred for an hour. Then,  $\alpha$ -methyl *trans*-cinnamaldehyde (1.3 mmol) dissolved in 1 mL of dry THF was added dropwise over 2 mins and stirred at room temperature for 30 mins. The reaction mixture was quenched with saturated aq. NH<sub>4</sub>Cl solution and extracted using ethyl acetate. The organic extracts were combined, dried over anhydrous sodium sulphate and concentrated. The

<sup>1</sup> B. Satpathi and S. S. V. Ramasastry, *Angew. Chem. Int. Ed.*, 2016, **55**, 1777.

product was purified by silica gel column chromatography using hexane/ethyl acetate (10:3) as eluent to afford the diol **C**.

**Representative procedure for step-III (Scheme 1S):** The diol **C** (1.0 mmol) was dissolved in ethyl acetate (10 mL) and IBX (2.2 mmol) was added. The resulting suspension was immersed in an oil bath set to 75 °C and stirred until diol **C** disappeared as monitored by TLC. The reaction mixture was cooled to room temperature and filtered through a Buchner funnel. The filter cake was washed with 3×5 mL of ethyl acetate. Organic extracts were combined and washed with saturated sodium bicarbonate solution to remove excess iodobenzoic acid. The extract was dried over anhydrous sodium sulphate and concentrated under vacuum. The crude product was purified by silica gel column chromatography using hexane/ethyl acetate as eluent to afford the enone **4**.

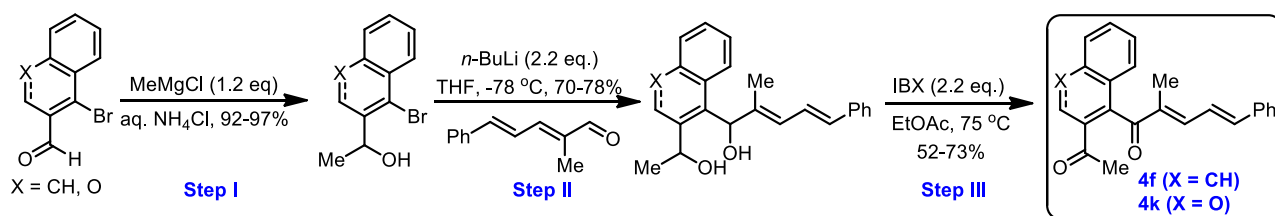

**Scheme 2S.** Syntheses of the dienone-ketones **4f** and **4k**.

**Representative procedure for step-I, II and III (Scheme 2S):** Reactions were performed by following the general procedure described for step-I, II and III, Scheme 1S.

#### General procedure-2: Syntheses of the dienone-ketones **4l** and **4o**.

The dienones **4l** and **4o** were synthesized by following literature methods, Scheme 4S.<sup>2</sup> Direct  $\alpha$ -alkylation of benzothiophene-3-carboxaldehyde **G** afforded **H**, which upon Grignard reaction and IBX oxidation generated the dienone-ketones **4l** and **4o**.

<sup>2</sup> (a) S. Dhiman and S. S. V. Ramasastry, *Indian J. Chem., Sect. A*, 2013, **52**, 1103; (b) R. P. Shirke and S. S. V. Ramasastry, *J. Org. Chem.*, 2015, **80**, 4893; (c) B. Satpathi, S. V. Wagulde and S. S. V. Ramasastry, *Chem. Commun.*, 2017, **53**, 8042.



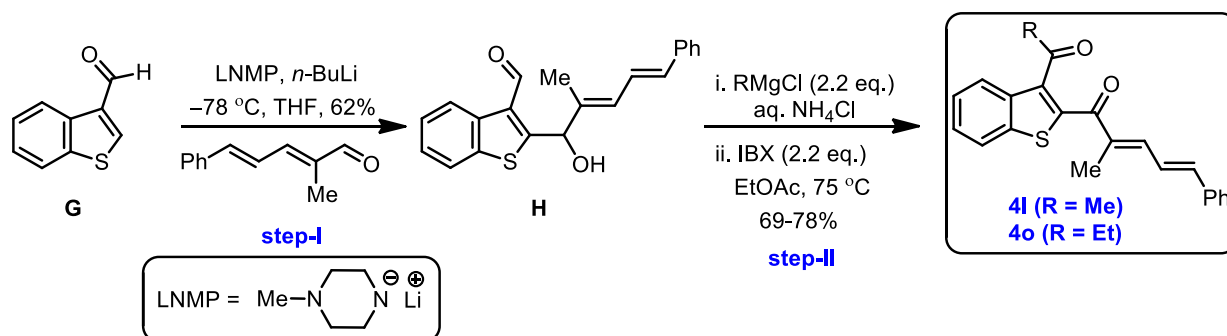

**Scheme 3S.** Syntheses of the dienone-ketones **4l** and **4o**.

**Representative procedure for step-I (Scheme 3S):** To a solution of *N*-methylpiperazine (NMP, 0.18 mL, 1.6 mmol) in THF (5 mL) at  $-78\text{ }^{\circ}\text{C}$  was added *n*-BuLi (1.6M in hexane, 1.0 mL, 1.6 mmol). After 15 min, benzothiophene-3-carboxaldehyde **G** (200 mg, 1.2 mmol) was added and then the reaction mixture was stirred for an additional 30 min. A hexane solution of *n*-BuLi (2.0 mL, 3.2 mmol) was added and the mixture was stirred for an additional 15 min and then the mixture was warmed to  $-30\text{ }^{\circ}\text{C}$  in 2 h. The solution was again cooled down to  $-78\text{ }^{\circ}\text{C}$  and an appropriate dienal (1.5 mmol) dissolved in dry THF (1.0 ml), was added drop wise over 5 min. The mixture was warmed to room temperature over 30 min. The reaction progress was monitored by TLC. Reaction mixture was quenched with saturated aqueous ammonium chloride solution and extracted with ethyl acetate. The organic extracts were combined, dried over anhydrous sodium sulphate and concentrated. The crude product was purified by silica gel column chromatography using hexane/ethyl acetate as eluent to afford dienol **H**.

**Representative procedure for step-II (Scheme 3S):** To an oven dried 25 mL RB flask, alcohol **H** (1.0 mmol) and anhydrous THF (10 mL) were added. Appropriate Grignard reagent (2.2 mmol) at  $0\text{ }^{\circ}\text{C}$  under nitrogen atmosphere and continued stirring at room temperature until **A** disappeared (as monitored by TLC). The reaction mixture was quenched with saturated aq.  $\text{NH}_4\text{Cl}$  and extracted with ethyl acetate. Organic extracts were combined and dried over anhydrous sodium sulphate and concentrated to afford the diol. The crude diol was further subjected to IBX oxidation (procedure as described in step III, scheme 1S) to afford the dienone-ketones **4l** and **4o**.

### General procedure-3: Optimization of the reaction parameters for 4a.

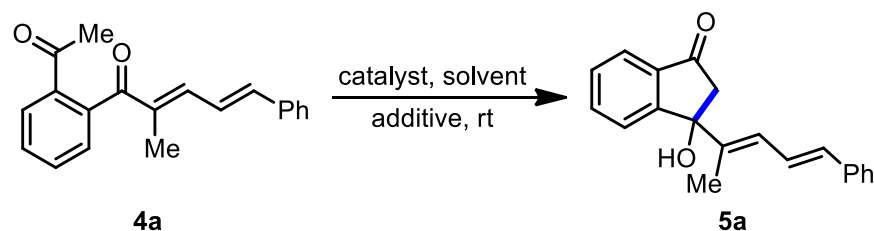

**Scheme 4S.** Optimization of reaction parameters for aldol reaction

**Representative procedure:** An oven dried 5 mL glass vial was charged with **4a** (30 mg, 0.11 mmol). An appropriate solvent (1 mL), additive and a catalyst (1.2 mmol) were introduced at room temperature (rt) and stirring continued at rt until **5a** disappeared as monitored by TLC. The reaction mixture was extracted using ethyl acetate. All the volatiles were removed under reduced pressure. The crude product was purified by silica gel chromatography using hexane/ethyl acetate (10%) as eluent, to afford **5a** as a pale yellow solid.

### General procedure-4: Evaluating the substrate scope for 5.

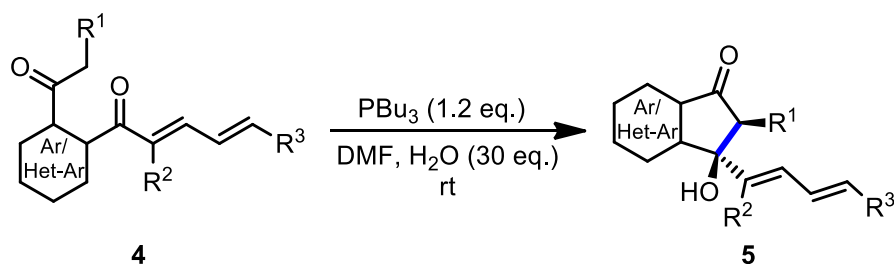

**Scheme 5S.** Synthesis of cyclopentannulated arenes and heteroarenes **5** via aldol reaction

**Representative procedure:** An oven dried 5 mL glass vial was charged with **4** (30 mg, 0.11 mmol). An appropriate solvent (1 mL), water (3.3 mmol) and  $\text{PBu}_3$  (1.3 mmol) were introduced at room temperature (rt) and stirring continued at rt until **5** disappeared as monitored by TLC. The reaction mixture was extracted using ethyl acetate. All the volatiles were removed under reduced pressure. The crude product was directly purified by silica gel chromatography using hexane/ethyl acetate as eluent to afford **5**.

## Efforts to gain mechanistic insights about the phosphine-mediated intramolecular aldol reaction

### 1. Aldol reaction of **4a** in the presence of D<sub>2</sub>O

The role of water was investigated in the aldol reaction by carrying out the reaction of **4a** using D<sub>2</sub>O instead of H<sub>2</sub>O, which resulted in the formation of **5a-D** in 81% yield (Scheme S18). The *D*-incorporation in **5a-D** at  $\delta$ -position was 25% and at  $\delta'$ -position, it was realized to be 64%.

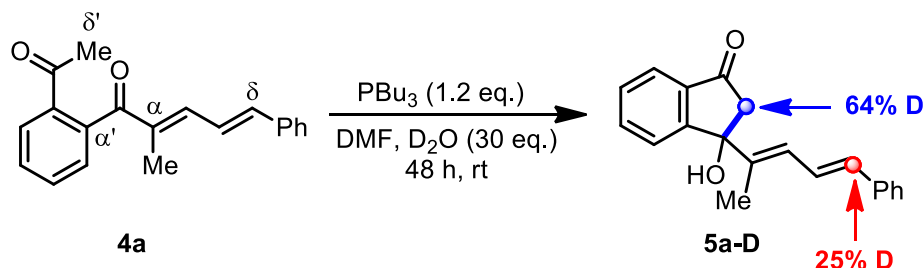

**Scheme 6S:** Aldol reaction of **4a** in presence of D<sub>2</sub>O

### 3-Hydroxy-3-((2*E*,4*E*)-5-phenylpenta-2,4-dien-2-yl)-2,3-dihydro-1*H*-inden-1-one (**5a-D**).

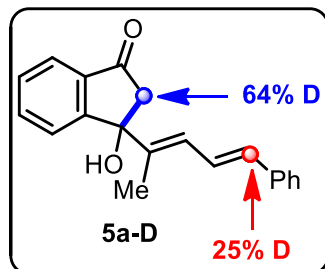

This compound was isolated as white solid. Following the general procedure-4, 50 mg of **4a** afforded 40.4 mg of **5a-D** (81% yield). M.P = 133-135 °C. *R<sub>f</sub>* = 0.3 (Hexane/EtOAc = 3/1). **IR (thin film, neat):**  $\nu_{\text{max}}/\text{cm}^{-1}$  3420, 2926, 1710, 1600, 1459, 1285, 1047, 753. **<sup>1</sup>H NMR (400 MHz, CDCl<sub>3</sub>):**  $\delta$  7.78 (d, *J* = 8.0 Hz, 1H), 7.69 (t, *J* = 7.6

Hz, 1H), 7.53-7.50 (m, 2H), 7.42 (t, *J* = 7.6 Hz, 1H), 7.32 (t, *J* = 7.7 Hz, 2H), 7.23 (t, *J* = 7.4 Hz, 1H), 7.01 (dd, *J* = 15.5 and 11.0 Hz, 2H), 6.62 (d, *J* = 15.5 Hz, 0.75H), 6.56 (d, *J* = 11.0 Hz, 1H), 3.07 (d, *J<sub>AB</sub>* = 19.2 Hz, 0.37H), 2.89 (d, *J<sub>AB</sub>* = 19.2 Hz, 0.33H), 2.33 (s, 1H), 1.72 (s, 3H). **<sup>13</sup>C NMR (100 MHz, CDCl<sub>3</sub>):**  $\delta$  203.4-203.3 (m, C=O), 156.8 (d, *J* = 2.2 Hz), 139.1, 137.4, 136.4 (d, *J* = 1.3 Hz), 135.6, 133.6, 129.6, 128.6 (2C), 127.6, 126.4 (2C), 124.7, 124.5, 124.4, 123.4, 80.0 (t, *J* = 5.5 Hz), 52.0-51.5 (m, CD<sub>2</sub>), 13.9. **HRMS (ESI):** *m/z* calcd for C<sub>20</sub>H<sub>15</sub>D<sub>3</sub>O<sub>2</sub> (M)<sup>+</sup>: 293.1495. Found: 293.1488.



SpinWorks 4: BS 08 02 RE  
 PROTON CDCl3 /opt/topspin3.5pl2/nmrdata nmrsu 25

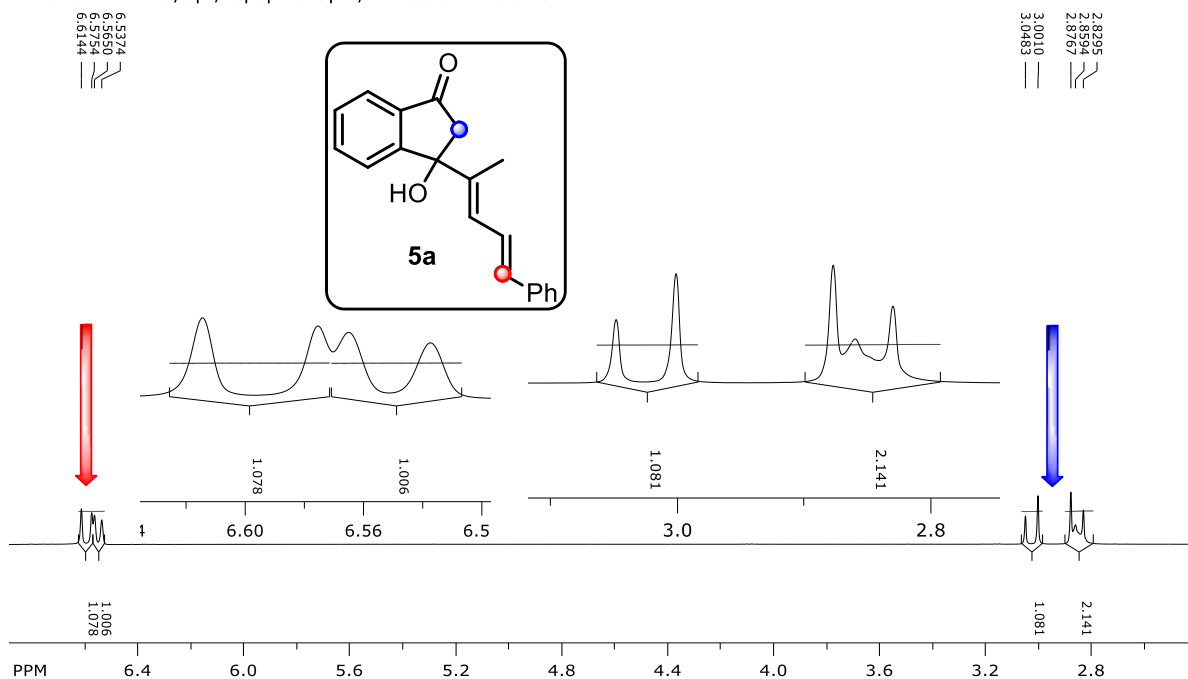

**Figure 3S:** Expanded  $^1\text{H}$  NMR spectrum of **5a**

SpinWorks 4: BS-09-106

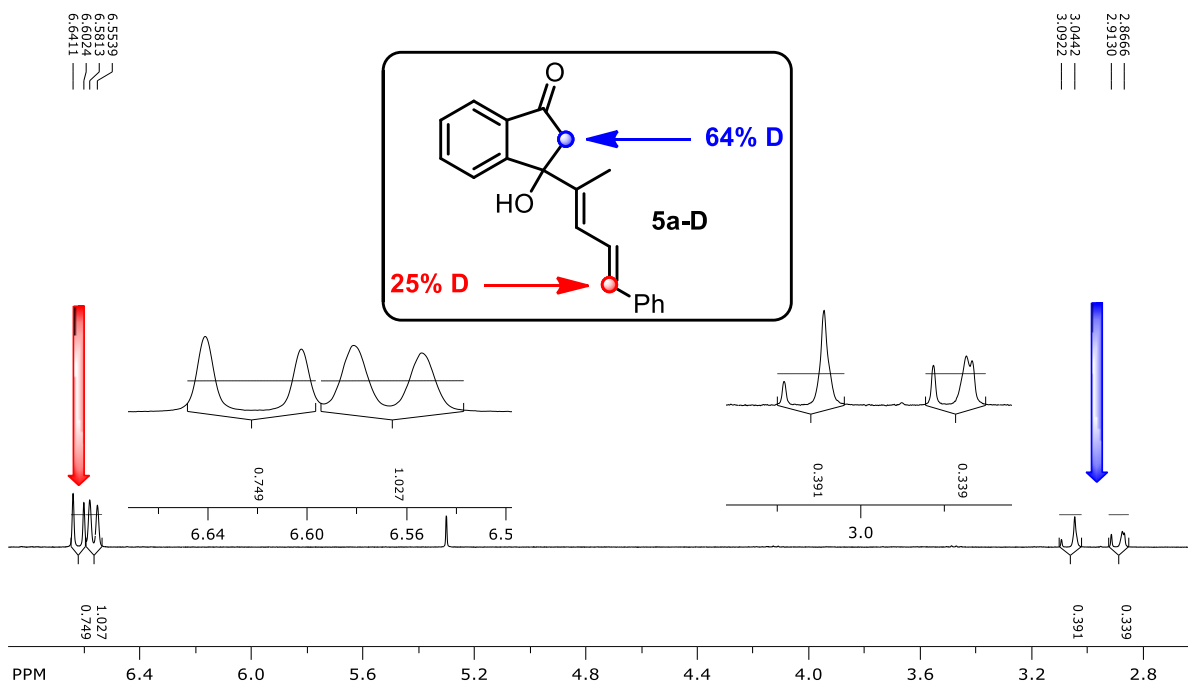

**Figure 4S:** Expanded  $^1\text{H}$  NMR spectrum of **5a-D**

## 2. Aldol reaction of 4a in the presence of H<sub>2</sub><sup>18</sup>O

The role of water in the phosphine-mediated aldol reaction was further elucidated by performing the aldol reaction of **4a** in the presence of <sup>18</sup>O-labelled water. The crude reaction mixture was analyzed by HRMS. The HRMS spectra as shown below (Figures 5S and 6S), revealed the abundance of P(<sup>18</sup>O)Bu<sub>3</sub> [(M+H)<sup>+</sup> found: 221.1913] increased ~550% (Figure 6S) more than the respective abundance of P(<sup>18</sup>O)Bu<sub>3</sub> [(M+H)<sup>+</sup> found: 221.1910] obtained from the H<sub>2</sub>O reaction (Figure 5S). This experiment further confirms the nucleophilic addition of water on to the phosphonium center during the course of the reaction triggering the elimination of phosphine oxide.

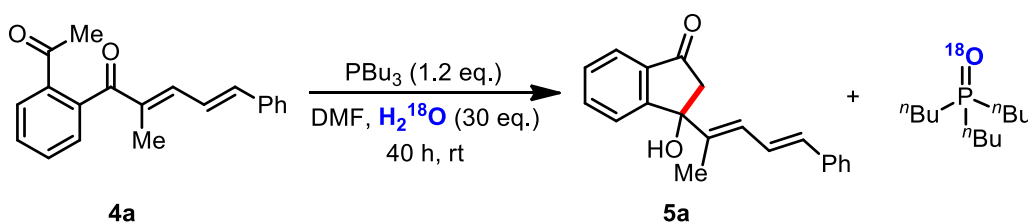

**Scheme 7S:** Reaction of **4a** in presence of H<sub>2</sub><sup>18</sup>O

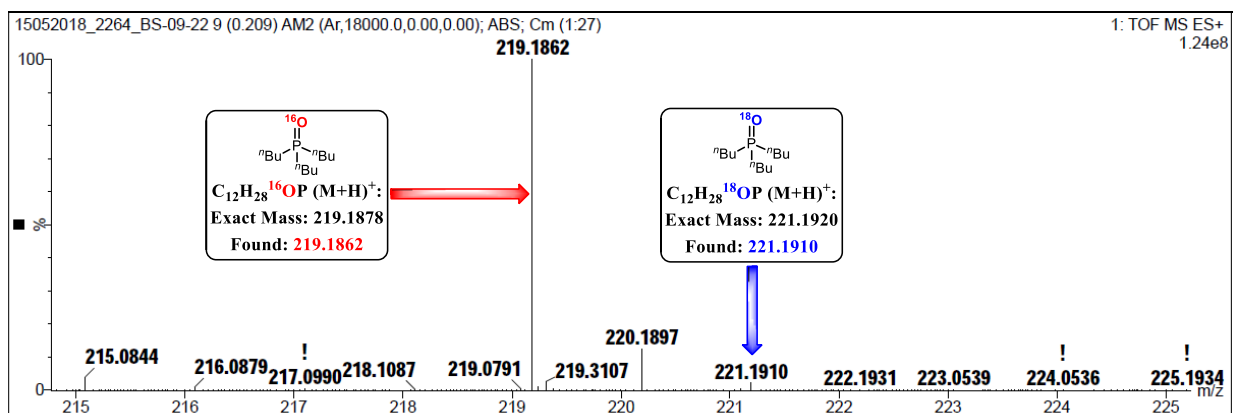

**Figure 5S:** HRMS spectrum of the crude reaction mixture of H<sub>2</sub>O reaction of **4a**

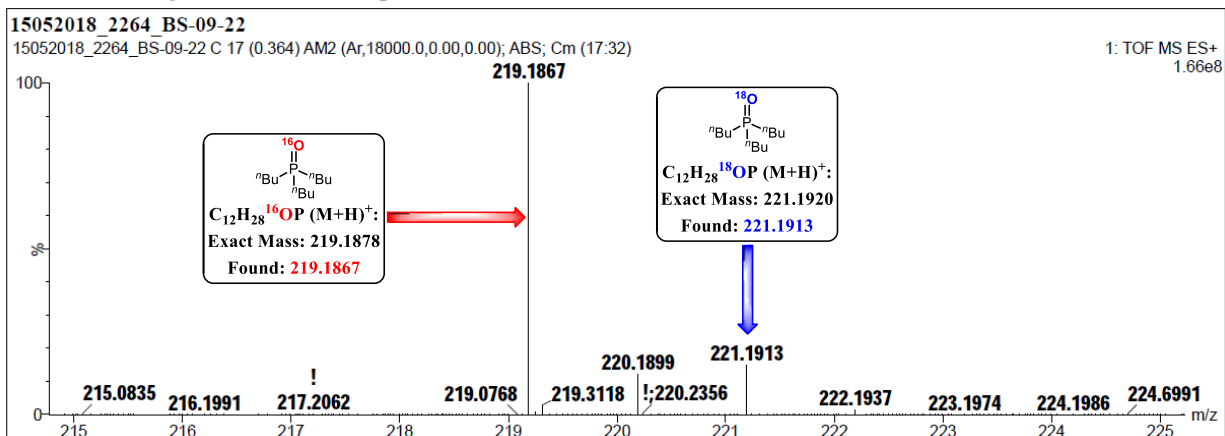

**Figure 6S:** HRMS spectrum of the crude reaction mixture of H<sub>2</sub><sup>18</sup>O reaction of **4a**

## Evidence that favours Lewis basic character of $\text{PBU}_3$

HRMS data of the crude reaction mixture of **4a** indicates the presence of  $\text{PBU}_3$ -adduct of **4a** (see the spectrum pasted below). Thus, this evidence points to the fact that the role of  $\text{PBU}_3$  is Lewis basic rather than Brønsted basic.

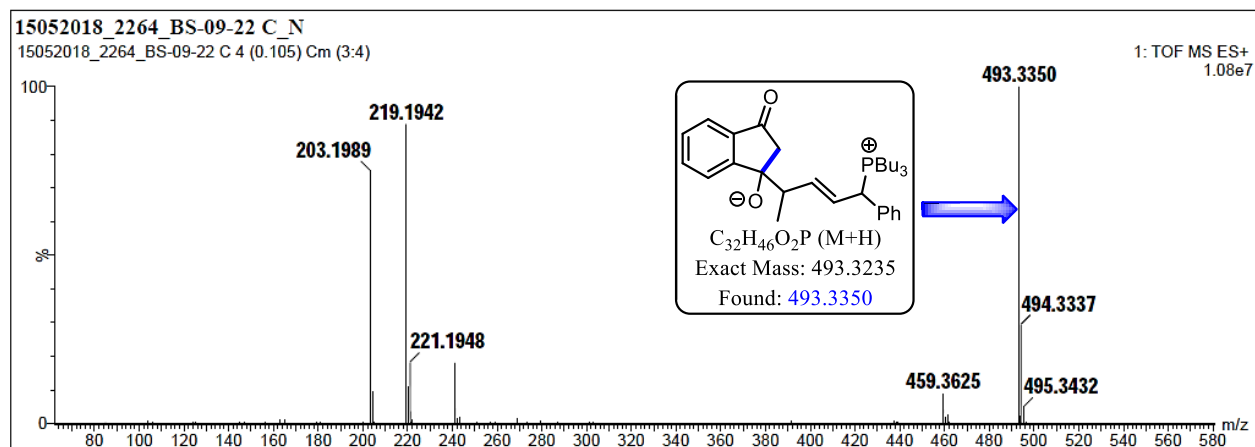

## Spectroscopic data of the newly synthesized compounds during this study

**(2E,4E)-1-(2-Acetylphenyl)-2-methyl-5-phenylpenta-2,4-dien-1-one (4a).** This compound was

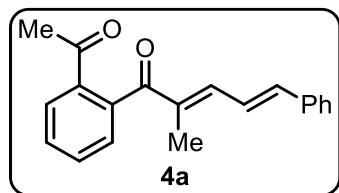

prepared by following the general procedure-1 and isolated as Pale yellow solid. M.P = 106-107 °C.  $R_f$  = 0.5 (Hexane/EtOAc = 4/1). **IR (thin film, neat):**  $\nu_{\max}/\text{cm}^{-1}$  3037, 2924, 1682, 1648, 1617, 1359, 1285, 1012, 756.  **$^1\text{H}$  NMR (400 MHz,  $\text{CDCl}_3$ ):**  $\delta$  7.87 (d,  $J$  = 7.6

Hz, 1H), 7.61 (t,  $J$  = 7.2 Hz, 1H), 7.55 (t,  $J$  = 7.6 Hz, 1H), 7.42-7.40 (m, 2H), 7.35-7.26 (m, 4H), 7.13 (dd,  $J$  = 15.5 and 11.2 Hz, 1H), 6.63 (d,  $J$  = 15.5 Hz, 1H), 6.55 (d,  $J$  = 11.2 Hz, 1H), 2.54 (s, 3H), 2.20 (s, 3H).  **$^{13}\text{C}$  NMR (100 MHz,  $\text{CDCl}_3$ ):**  $\delta$  199.9, 198.4, 141.3, 141.0, 139.5, 137.7, 137.0, 136.4, 132.1, 129.5, 129.2, 128.9, 128.8 (2C), 128.2, 127.1 (2C), 124.3, 27.5, 12.1. **HRMS (ESI):**  $m/z$  calcd for  $\text{C}_{20}\text{H}_{19}\text{O}_2$  ( $\text{M}+\text{H}$ ) $^+$ : 291.1385. Found: 291.1397.

**3-Hydroxy-3-((2E,4E)-5-phenylpenta-2,4-dien-2-yl)-2,3-dihydro-1H-inden-1-one (5a).** This

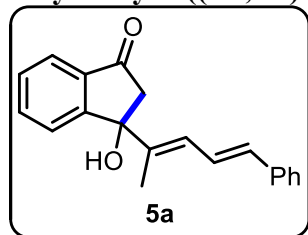

compound was isolated as pale yellow solid. Following the general procedure-4, 40 mg of **4a** afforded 35.7 mg of **5a** (89% yield). M.P = 119-120 °C.  $R_f$  = 0.3 (Hexane/EtOAc = 3/1). **IR (thin film, neat):**  $\nu_{\max}/\text{cm}^{-1}$  3418, 3025, 2930, 1695, 1595, 1499, 1286, 738.  **$^1\text{H}$  NMR**

**(400 MHz,  $\text{CDCl}_3$ ):**  $\delta$  7.74 (d,  $J$  = 7.6 Hz, 1H), 7.66 (t,  $J$  = 7.6 Hz, 1H), 7.51-7.46 (m, 2H), 7.41-7.39 (m, 2H), 7.31 (t,  $J$  = 7.6 Hz, 2H), 7.24-7.20 (m, 1H), 7.00 (dd,  $J$  = 15.4 and 11.4 Hz, 1H), 6.59 (d,  $J$  = 15.6 Hz, 1H), 6.55 (d,  $J$  = 11.1 Hz, 1H), 3.02 (d,  $J_{\text{AB}}$  = 18.9 Hz, 1H), 2.85 (d,  $J_{\text{AB}}$  = 18.9 Hz, 1H), 2.85 (s, 1H), 1.70 (s, 3H).  **$^{13}\text{C}$  NMR (100 MHz,  $\text{CDCl}_3$ ):**  $\delta$  203.6, 156.9, 139.2, 137.4, 136.3, 135.6, 133.6, 129.6, 128.6 (2C), 127.6, 126.4 (2C), 124.7, 124.6, 124.4, 123.3, 80.0, 52.0, 13.9. **HRMS (ESI):**  $m/z$  calcd for  $\text{C}_{20}\text{H}_{19}\text{O}_2$  ( $\text{M}+\text{H}$ ) $^+$ : 291.1385. Found: 291.1371.

**(2E,4E)-1-(2-Acetylphenyl)-5-(furan-2-yl)-2-methylpenta-2,4-dien-1-one (4b).** This

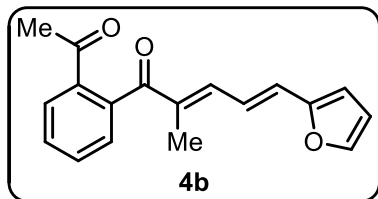

compound was prepared by following the general procedure-1 and isolated as Pale yellow oil.  $R_f$  = 0.5 (Hexane/EtOAc = 4/1). **IR (thin film, neat):**  $\nu_{\max}/\text{cm}^{-1}$  2925, 1683, 1645, 1606, 1476, 1358, 1260, 1074, 757.  **$^1\text{H}$  NMR (400 MHz,  $\text{CDCl}_3$ ):**  $\delta$  7.85 (dd,

$J$  = 7.6 and 1.2 Hz, 1H), 7.58-7.51 (m, 2H), 7.41 (d,  $J$  = 1.6 Hz, 1H), 7.33 (dd,  $J$  = 7.5 and 1.4 Hz, 1H), 7.00 (dd,  $J$  = 15.2 and 11.3 Hz, 1H), 6.49 (d,  $J$  = 11.6 Hz, 1H), 6.42 (d,  $J$  = 15.3 Hz,



1H), 6.40-6.39 (m, 1H), 6.35 (d,  $J = 3.5$  Hz, 1H), 2.52 (s, 3H), 2.17 (d,  $J = 1.0$  Hz, 3H). **<sup>13</sup>C NMR (100 MHz, CDCl<sub>3</sub>):**  $\delta$  199.6, 198.5, 152.5, 143.6, 141.3, 140.7, 137.6, 137.1, 132.0, 129.4, 129.1, 128.2, 126.0, 122.6, 112.1, 111.5, 27.6, 12.1. **HRMS (ESI):**  $m/z$  calcd for C<sub>18</sub>H<sub>17</sub>O<sub>3</sub> (M+H)<sup>+</sup>: 281.1178. Found: 281.1164.

**3-((2E,4E)-5-(Furan-2-yl)penta-2,4-dien-2-yl)-3-hydroxy-2,3-dihydro-1H-inden-1-one (5b).**

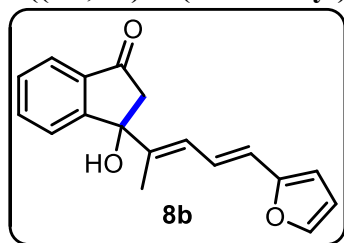

This compound was isolated as pale yellow oil. Following the general procedure-4, 40 mg of **4b** afforded 36 mg of **5b** (88% yield).  $R_f = 0.3$  (Hexane/EtOAc = 3/1). **IR (thin film, neat):**  $\nu_{\max}/\text{cm}^{-1}$  3427, 2927, 2859, 1697, 1602, 1236, 1059, 737. **<sup>1</sup>H NMR**

**(400 MHz, CDCl<sub>3</sub>):**  $\delta$  7.76 (d,  $J = 7.8$  Hz, 1H), 7.67 (t,  $J = 7.8$  Hz, 1H), 7.52-7.48 (m, 2H), 7.36 (d,  $J = 1.3$  Hz, 1H), 6.89 (dd,  $J = 15.4$  and 11.2 Hz, 1H), 6.50 (d,  $J = 11.3$  Hz, 1H), 6.40-6.37 (m, 2H), 6.27 (d,  $J = 3.2$  Hz, 1H), 3.04 (d,  $J_{AB} = 19.0$  Hz, 1H), 2.86 (d,  $J_{AB} = 19.0$  Hz, 1H), 2.61 (s, 1H), 1.69 (s, 3H). **<sup>13</sup>C NMR (100 MHz, CDCl<sub>3</sub>):**  $\delta$  203.4, 156.9, 153.2, 142.2, 139.4, 136.3, 135.6, 129.6, 124.5, 124.3, 123.3, 123.0, 120.9, 111.6, 108.6, 80.0, 51.9, 13.9. **HRMS (ESI):**  $m/z$  calcd for C<sub>18</sub>H<sub>15</sub>O<sub>2</sub> (M-OH)<sup>+</sup>: 263.1072. Found: 263.1042.

**(2E,4E)-5-([1,1'-Biphenyl]-4-yl)-1-(2-acetylphenyl)-2-methylpenta-2,4-dien-1-one (4c).** This

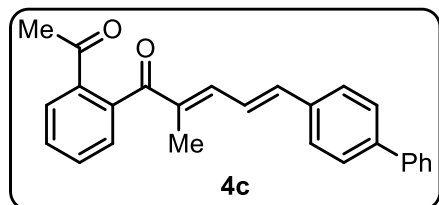

compound was prepared by following the general procedure-1 and isolated as white solid. M.P = 168-170 °C.  $R_f = 0.4$  (Hexane/EtOAc = 4/1). **IR (thin film, neat):**  $\nu_{\max}/\text{cm}^{-1}$  3032, 1683, 1648, 1615, 1484, 1358, 1263, 1009, 762. **<sup>1</sup>H NMR**

**(400 MHz, CDCl<sub>3</sub>):**  $\delta$  7.88 (dd,  $J = 8.0$  and 1.1 Hz, 1H), 7.61-7.53 (m, 6H), 7.52-7.41 (m, 4H), 7.36-7.35 (m, 2H), 7.17 (dd,  $J = 15.2$  and 11.2 Hz, 1H), 6.67 (d,  $J = 15.3$  Hz, 1H), 6.58 (dd,  $J = 11.2$  and 0.9 Hz, 1H), 2.55 (s, 3H), 2.22 ( $J = 1.0$  Hz, 3H). **<sup>13</sup>C NMR (100 MHz, CDCl<sub>3</sub>):**  $\delta$  199.8, 198.4, 141.5, 141.4, 141.0, 140.3, 139.0, 137.7, 137.1, 135.4, 132.1, 129.4, 129.2, 128.8 (2C), 128.2, 127.6, 127.5 (2C), 127.4 (2C), 126.9 (2C), 124.3, 27.6, 12.2. **HRMS (ESI):**  $m/z$  calcd for C<sub>26</sub>H<sub>23</sub>O<sub>2</sub> (M+H)<sup>+</sup>: 367.1698. Found: 367.1683.

**3-((2E,4E)-5-([1,1'-biphenyl]-4-yl)penta-2,4-dien-2-yl)-3-hydroxy-2,3-dihydro-1H-inden-1-one (5c).**

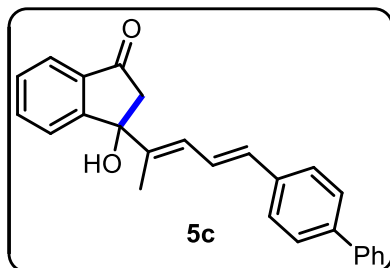

This compound was prepared by following the general procedure-4 and isolated as Pale yellow solid. M.P = 201-203 °C.  $R_f$  = 0.3 (Hexane/EtOAc = 3/1). **IR (thin film, neat):**  $\nu_{\max}/\text{cm}^{-1}$  3421, 2917, 2852, 1703, 1597, 1059, 982, 764.  **$^1\text{H}$  NMR (400 MHz,  $(\text{CD}_3)_2\text{SO}$ ):**  $\delta$  7.76 (dt,  $J$  = 7.6 and 1.0 Hz, 1H), 7.69-7.60 (m, 6H), 7.57-7.52 (m, 2H), 7.46 (t,  $J$  = 7.8 Hz, 2H), 7.20 (dd,  $J$  = 15.6 and 11.2 Hz, 1H), 6.65 (d,  $J$  = 15.5 Hz, 1H), 6.49 (d,  $J$  = 11.2 Hz, 1H), 6.05 (s, 1H), 3.01 (d,  $J_{AB}$  = 18.8 Hz, 1H), 2.75 (d,  $J_{AB}$  = 18.8 Hz, 1H), 1.68 (s, 3H).  **$^{13}\text{C}$  NMR (100 MHz,  $\text{CDCl}_3$ ):**  $\delta$  203.8, 158.5, 141.9, 140.1, 139.3, 137.0, 136.2, 135.8, 132.2, 129.5, 129.4 (2C), 127.8, 127.4 (2C), 127.2 (2C), 126.8 (2C), 125.8, 125.7, 124.4, 122.7, 79.1, 52.2, 14.1. **HRMS (ESI):**  $m/z$  calcd for  $\text{C}_{26}\text{H}_{22}\text{NaO}_2$  ( $\text{M}+\text{Na}$ ) $^+$ : 389.1517. Found: 389.1512.

**(2E,4E)-1-(2-Acetylphenyl)-2,5-diphenylpenta-2,4-dien-1-one (4d).**

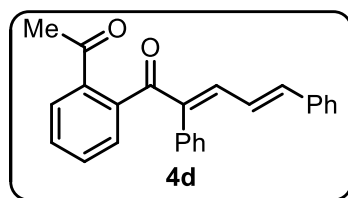

prepared by following the general procedure-1 and isolated as Pale yellow oil.  $R_f$  = 0.4 (Hexane/EtOAc = 3/1). **IR (thin film, neat):**  $\nu_{\max}/\text{cm}^{-1}$  3058, 1680, 1654, 1611, 1491, 1444, 1267, 1240, 1084, 1054, 975, 700.  **$^1\text{H}$  NMR (400 MHz,  $\text{CDCl}_3$ ):**  $\delta$  7.84 (dd,  $J$  = 7.9 and 0.8 Hz, 1H), 7.61 (dt,  $J$  = 7.4 and 1.2 Hz, 1H), 7.53 (dt,  $J$  = 7.6 and 1.4 Hz, 1H), 7.47-7.43 (m, 5H), 7.38-7.35 (m, 1H), 7.29-7.23 (m, 5H), 6.92-6.83 (m, 2H), 6.76-6.73 (m, 1H), 2.54 (s, 3H).  **$^{13}\text{C}$  NMR (100 MHz,  $\text{CDCl}_3$ ):**  $\delta$  198.4, 198.1, 141.8, 141.7, 141.6, 140.8, 137.0, 136.2, 135.2, 132.2, 130.6 (2C), 129.4, 129.3, 129.0, 128.7 (2C), 128.4, 128.1 (2C), 127.8, 127.2 (2C), 125.3, 27.4. **HRMS (ESI):**  $m/z$  calcd for  $\text{C}_{25}\text{H}_{21}\text{O}_2$  ( $\text{M}+\text{H}$ ) $^+$ : 353.1542. Found: 353.1530.

**3-((1E,3E)-1,4-Diphenylbuta-1,3-dien-1-yl)-3-hydroxy-2,3-dihydro-1H-inden-1-one (5d).**

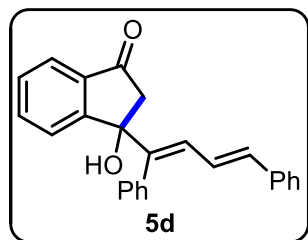

This compound was isolated as pale yellow oil. Following the general procedure-4, 40 mg of **4d** afforded 34 mg of **5d** (85% yield).  $R_f$  = 0.4 (Hexane/EtOAc = 2/1). **IR (thin film, neat):**  $\nu_{\max}/\text{cm}^{-1}$  3418, 3030, 2926, 1711, 753.  **$^1\text{H}$  NMR (400 MHz,  $\text{CDCl}_3$ ):**  $\delta$  7.74 (d,  $J$  = 3.6 Hz, 2H), 7.69 (d,  $J$  = 7.6 Hz, 1H), 7.54-7.50 (m, 1H), 7.27-7.15 (m, 8H), 6.84-6.80 (m, 3H), 6.65 (d,  $J$  = 15.6 Hz, 1H), 6.47 (d,  $J$  = 10.8 Hz, 1H), 3.12 (d,  $J_{AB}$  = 18.8 Hz, 1H), 2.84 (d,  $J_{AB}$  = 18.8 Hz,

1H), 2.59 (s, 1H). <sup>13</sup>C NMR (100 MHz, CDCl<sub>3</sub>): δ 202.7, 156.5, 145.5, 137.1, 136.8, 136.6, 135.4, 134.4 (2C), 127.9, 19.7, 128.5 (2C), 128.3 (2C), 127.8, 127.7, 127.3, 126.5 (2C), 125.7, 125.1, 123.2, 79.4, 52.7. **HRMS (ESI):** *m/z* calcd for C<sub>25</sub>H<sub>21</sub>O<sub>2</sub> (M+H)<sup>+</sup>: 353.1542. Found: 353.1534.

**(2E,4E)-1-(2-Acetylphenyl)-2-benzyl-5-phenylpenta-2,4-dien-1-one (4e).** This compound was

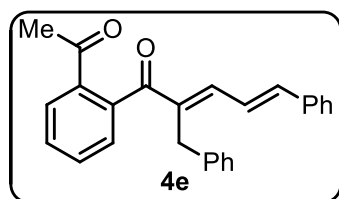

prepared by following the general procedure-1 and isolated as Pale yellow solid. M.P = 107-109 °C. R<sub>f</sub> = 0.4 (Hexane/EtOAc = 4/1). **IR (thin film, neat):** ν<sub>max</sub>/cm<sup>-1</sup> 3028, 1613, 1438, 1360, 1261, 740. **<sup>1</sup>H NMR (400 MHz, CDCl<sub>3</sub>):** δ 7.84 (d, *J* = 7.2 Hz, 1H), 7.55-7.53 (m,

2H), 7.37-7.25 (m, 10H), 7.21-7.15 (m, 2H), 6.79 (d, *J* = 11.2 Hz, 1H), 6.70 (d, *J* = 15.4 Hz, 1H), 4.06 (s, 2H), 2.52 (s, 3H). <sup>13</sup>C NMR (100 MHz, CDCl<sub>3</sub>): δ 198.9, 198.7, 143.5, 141.1, 140.9, 140.0, 139.7, 137.6, 136.2, 131.8, 129.3, 129.2, 129.1, 128.8 (2C), 128.5 (4C), 128.2, 127.2 (2C), 126.0, 124.2, 31.8, 27.8. **HRMS (ESI):** *m/z* calcd for C<sub>26</sub>H<sub>23</sub>O<sub>2</sub> (M+H)<sup>+</sup>: 367.1698. Found: 367.1679.

**3-((2E,4E)-1,5-Diphenylpenta-2,4-dien-2-yl)-3-hydroxy-2,3-dihydro-1H-inden-1-one (5e).**

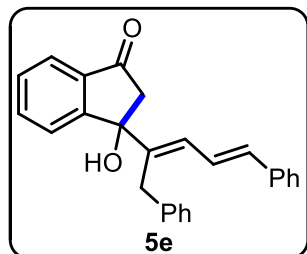

This compound was isolated as pale yellow oil. Following the general procedure-4, 30 mg of **4e** afforded 26 mg of **5e** (87% yield). R<sub>f</sub> = 0.2 (Hexane/EtOAc = 3/1). **IR (thin film, neat):** ν<sub>max</sub>/cm<sup>-1</sup> 3422, 3059, 3029, 2926, 1709, 1602, 1455, 1285, 1058, 749. **<sup>1</sup>H NMR (400 MHz, CDCl<sub>3</sub>):** δ 7.77 (d, *J* = 7.6 Hz, 1H), 7.61 (t, *J* = 7.5 Hz, 1H), 7.51-7.48

(m, 1H), 7.46-7.44 (m, 1H), 7.39-7.36 (m, 2H), 7.33-7.18 (m, 8H), 7.13-7.11 (m, 2H), 7.04 (dd, *J* = 15.2 and 11.2 Hz, 1H), 6.69 (d, *J* = 15.2 Hz, 1H), 6.68 (d, *J* = 11.0 Hz, 1H), 3.77 (d, *J*<sub>AB</sub> = 15.7 Hz, 1H), 3.49 (d, *J*<sub>AB</sub> = 15.7 Hz, 1H), 2.95 (d, *J*<sub>AB</sub> = 19.0 Hz, 1H), 2.80 (d, *J*<sub>AB</sub> = 19.0 Hz, 1H), 2.29 (s, 3H). <sup>13</sup>C NMR (100 MHz, CDCl<sub>3</sub>): δ 203.2, 156.8, 142.1, 139.3, 137.1, 136.3, 135.3, 134.9, 129.6, 128.7 (2C), 128.6 (2C), 128.5, 128.0 (2C), 127.8, 127.6, 126.5 (2C), 124.9, 124.5, 123.2, 80.3, 52.9, 34.1. **HRMS (ESI):** *m/z* calcd for C<sub>26</sub>H<sub>23</sub>O<sub>2</sub> (M+H)<sup>+</sup>: 367.1698. Found: 367.1671.

**(2E,4E)-1-(2-Acetylnaphthalen-1-yl)-2-methyl-5-phenylpenta-2,4-dien-1-one (4f).** This

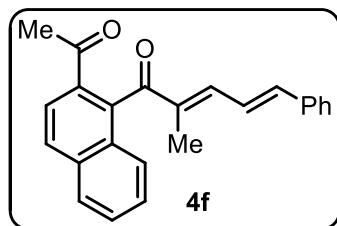

compound was prepared by following the general procedure-1 and isolated as white solid. M.P = 152-153 °C.  $R_f$  = 0.3 (Hexane/EtOAc = 4/1). **IR (thin film, neat):**  $\nu_{\max}/\text{cm}^{-1}$  3060, 2921, 1682, 1646, 1616, 1463, 1426, 1382, 1279, 1243, 1074, 736.  **$^1\text{H}$  NMR (400 MHz,  $\text{CDCl}_3$ ):**  $\delta$  8.01-7.91 (m, 3H), 7.75 (d,  $J$  = 8.1 Hz, 1H), 7.60 (dt,  $J$  = 6.8 and 1.2 Hz, 1H), 7.52 (dt,  $J$  = 8.1 and 1.3 Hz, 1H), 7.36-7.34 (m, 2H), 7.31-7.24 (m, 3H), 7.13 (dd,  $J$  = 15.2 and 11.3 Hz, 1H), 6.49-6.45 (m, 2H), 2.65 (s, 3H), 2.33 (s, 3H).  **$^{13}\text{C}$  NMR (100 MHz,  $\text{CDCl}_3$ ):**  $\delta$  200.6, 198.0, 140.9, 140.2, 139.5, 138.5, 136.3, 135.1, 132.0, 130.8, 129.1, 128.8, 128.7 (2C), 128.6, 127.9, 127.7, 127.4, 127.0 (2C), 125.1, 124.3, 28.0, 12.0. **HRMS (ESI):**  $m/z$  calcd for  $\text{C}_{24}\text{H}_{21}\text{O}_2$  ( $\text{M}+\text{H}$ ) $^+$ : 341.1542. Found: 341.1524.

**1-Hydroxy-1-((2E,4E)-5-phenylpenta-2,4-dien-2-yl)-1H-cyclopenta[a]naphthalen-3(2H)-one (5f).** This compound was isolated as pale yellow oil. Following the

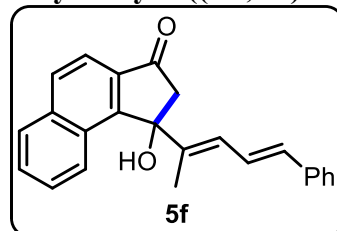

general procedure-4, 40 mg of **4f** afforded 35.2 mg of **5f** (88% yield).  $R_f$  = 0.3 (Hexane/EtOAc = 2/1). **IR (thin film, neat):**  $\nu_{\max}/\text{cm}^{-1}$  3429, 3055, 2924, 1693, 1453, 1278, 746.  **$^1\text{H}$  NMR (400 MHz,  $\text{CDCl}_3$ ):**  $\delta$  8.35 (d,  $J$  = 7.8 Hz, 1H), 7.92 (d,  $J$  = 8.2 Hz, 1H), 7.86 (d,  $J$  = 8.4 Hz, 1H), 7.68-7.61 (m, 2H), 7.57-7.53 (m, 1H), 7.40 (d,  $J$  = 3.3 Hz, 2H), 7.30 (t,  $J$  = 7.4 Hz, 2H), 7.24-7.18 (m, 1H), 7.03 (dd,  $J$  = 15.4 and 11.0 Hz, 1H), 6.76 (d,  $J$  = 11.0 Hz, 1H), 6.61 (d,  $J$  = 15.6 Hz, 1H), 3.08 (s, 1H), 3.05 (d,  $J_{\text{AB}}$  = 19.0 Hz, 1H), 2.92 (d,  $J_{\text{AB}}$  = 19.0 Hz, 1H), 1.62 (s, 3H).  **$^{13}\text{C}$  NMR (100 MHz,  $\text{CDCl}_3$ ):**  $\delta$  203.3, 155.4, 139.7, 137.5, 135.0, 133.3, 131.1, 129.2, 129.14, 129.13, 128.6 (2C), 127.6, 127.5, 126.3 (2C), 126.0, 124.6, 124.5, 118.6, 80.8, 53.5, 13.8. **HRMS (ESI):**  $m/z$  calcd for  $\text{C}_{24}\text{H}_{19}\text{O}_2$  ( $\text{M}-\text{H}$ ) $^+$ : 339.1385. Found: 339.1363.

**(2E,4E)-1-(2-Acetyl-4-methoxyphenyl)-2-methyl-5-phenylpenta-2,4-dien-1-one (4g).** This

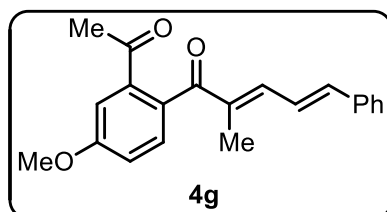

compound was prepared by following the general procedure-1 and isolated as Pale yellow oil.  $R_f$  = 0.3 (Hexane/EtOAc = 3/1). **IR (thin film, neat):**  $\nu_{\max}/\text{cm}^{-1}$  2933, 2849, 1688, 1604, 1486, 1358, 1284, 1177, 1010, 751.  **$^1\text{H}$  NMR (400 MHz,  $\text{CDCl}_3$ ):**  $\delta$

7.44-7.42 (m, 2H), 7.36-7.25 (m, 5H), 7.13 (dd,  $J$  = 15.4 and 11.2 Hz, 1H), 7.09-7.05 (m, 1H),

6.65 (d,  $J = 15.7$  Hz, 1H), 6.63 (d,  $J = 11.3$  Hz, 1H), 3.91 (s, 3H), 2.49 (s, 3H), 2.17 (s, 3H).  **$^{13}\text{C}$  NMR (100 MHz,  $\text{CDCl}_3$ ):**  $\delta$  199.5, 199.2, 160.3, 141.0, 140.4, 139.5, 137.9, 136.4, 132.8, 130.3, 128.9 (2C), 127.1 (2C), 124.3, 115.9, 114.9, 55.7, 28.2, 12.4. **HRMS (ESI):**  $m/z$  calcd for  $\text{C}_{21}\text{H}_{21}\text{O}_3$  ( $\text{M}+\text{H}$ ) $^+$ : 321.1491. Found: 321.1476.

**3-Hydroxy-6-methoxy-3-((2E,4E)-5-phenylpenta-2,4-dien-2-yl)-2,3-dihydro-1H-inden-1-one (5g).**

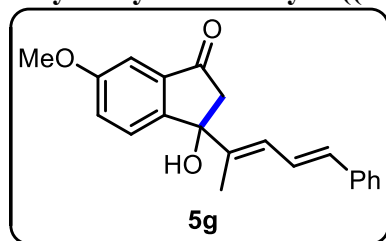

This compound was isolated as white solid. Following the general procedure-4, 40 mg of **4g** afforded 36 mg of **5g** (84% yield).  $R_f = 0.3$  (Hexane/EtOAc = 2/1). **IR (thin film, neat):**  $\nu_{\text{max}}/\text{cm}^{-1}$  3058, 2926, 2854, 2749, 1762, 1694, 1643, 1609,

1459, 1386, 1282, 1081, 745.  **$^1\text{H}$  NMR (400 MHz,  $\text{CDCl}_3$ ):**  $\delta$  7.43-7.39 (m, 3H), 7.33-7.30 (m, 2H), 7.25-7.22 (m, 2H), 7.18 (d,  $J = 2.4$  Hz, 1H), 7.00 (dd,  $J = 15.5$  and 11.1 Hz, 1H), 6.60 (d,  $J = 15.5$  Hz, 1H), 6.53 (d,  $J = 11.1$  Hz, 1H), 3.86 (s, 3H), 3.06 (d,  $J_{\text{AB}} = 18.9$  Hz, 1H), 2.89 (d,  $J_{\text{AB}} = 18.9$  Hz, 1H), 2.34 (s, 1H), 1.72 (d,  $J = 0.9$  Hz, 3H).  **$^{13}\text{C}$  NMR (100 MHz,  $\text{CDCl}_3$ ):**  $\delta$  203.2, 161.0, 149.6, 139.4, 137.9, 137.4, 133.5, 128.6 (2C), 127.6, 126.3 (2C), 125.5, 124.7, 124.6, 124.5, 104.4, 79.6, 55.7, 52.6, 13.9. **HRMS (ESI):**  $m/z$  calcd for  $\text{C}_{21}\text{H}_{21}\text{O}_3$  ( $\text{M}+\text{H}$ ) $^+$ : 321.1491. Found: 321.1485.

**(2E,4E)-1-(2-Acetyl-4-methoxyphenyl)-5-(furan-2-yl)-2-methylpenta-2,4-dien-1-one (4h).**

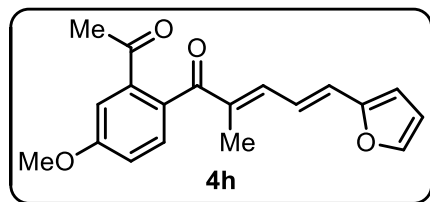

This compound was prepared by following the general procedure-1 and isolated as Pale yellow oil.  $R_f = 0.4$  (Hexane/EtOAc = 3/1). **IR (thin film, neat):**  $\nu_{\text{max}}/\text{cm}^{-1}$  2938, 2843, 1687, 1642, 1603, 1479, 1358, 1286, 1219, 1010, 740.

**$^1\text{H}$  NMR (400 MHz,  $\text{CDCl}_3$ ):**  $\delta$  7.42 (s, 1H), 7.33 (d,  $J = 8.4$  Hz, 1H), 7.23 (d,  $J = 1.5$  Hz, 1H), 7.05 (dd,  $J = 8.0$  and 2.6 Hz, 1H), 7.00 (dd,  $J = 15.3$  and 11.5 Hz, 1H), 6.57 (d,  $J = 11.5$  Hz, 1H), 6.45 (d,  $J = 15.4$  Hz, 1H), 6.41-6.36 (m, 2H), 3.90 (s, 3H), 2.46 (s, 3H), 2.17 (s, 3H).  **$^{13}\text{C}$  NMR (100 MHz,  $\text{CDCl}_3$ ):**  $\delta$  199.6, 198.9, 160.3, 152.5, 143.5, 140.8, 140.5, 137.9, 132.7, 130.3, 126.0, 122.6, 115.9, 114.8, 112.1, 111.5, 55.6, 28.2, 12.3. **HRMS (ESI):**  $m/z$  calcd for  $\text{C}_{19}\text{H}_{19}\text{O}_4$  ( $\text{M}+\text{H}$ ) $^+$ : 311.1283. Found: 311.1267.

**3-((2E,4E)-5-(Furan-2-yl)penta-2,4-dien-2-yl)-3-hydroxy-6-methoxy-2,3-dihydro-1H-inden-**

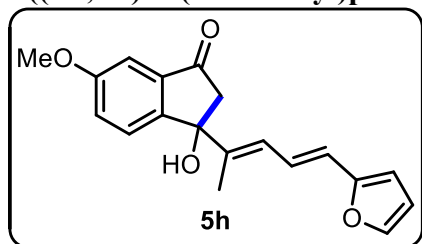

**1-one (5h).** This compound was isolated as pale yellow oil. Following the general procedure-4, 30 mg of **4h** afforded 25.8 mg of **5h** (86% yield).  $R_f = 0.3$  (Hexane/EtOAc = 3/1). **IR** (thin film, neat):  $\nu_{\max}/\text{cm}^{-1}$  3422, 2928, 2849, 1708, 1605,

1488, 1282, 1056.  **$^1\text{H}$  NMR (400 MHz,  $\text{CDCl}_3$ ):**  $\delta$  7.40 -7.38 (m, 2H), 7.25 (dd,  $J = 8.4$  and  $2.6$  Hz, 1H), 7.18 (d,  $J = 2.4$  Hz, 1H), 6.92 (dd,  $J = 15.4$  and  $11.2$  Hz, 1H), 6.48 (d,  $J = 11.2$  Hz, 1H), 6.42-6.38 (m, 2H), 6.28 (d,  $J = 3.2$  Hz, 1H), 3.88 (s, 3H), 3.07 (d,  $J_{\text{AB}} = 19.0$  Hz, 1H), 2.90 (d,  $J_{\text{AB}} = 19.0$  Hz, 1H), 2.25 (s, 3H), 1.72 (s, 3H).  **$^{13}\text{C}$  NMR (100 MHz,  $\text{CDCl}_3$ ):**  $\delta$  203.2, 161.0, 153.2, 149.6, 142.1, 139.6, 137.8, 125.5, 124.7, 124.2, 123.1, 120.8, 111.6, 108.5, 104.4, 79.6, 55.7, 52.5, 13.9. **HRMS (ESI):**  $m/z$  calcd for  $\text{C}_{19}\text{H}_{17}\text{O}_3$  ( $\text{M}-\text{OH}$ ) $^+$ : 293.1178. Found: 293.1152.

**(2E,4E)-1-(2-Acetyl-4,5-dimethoxyphenyl)-2-methyl-5-phenylpenta-2,4-dien-1-one (4i).** This

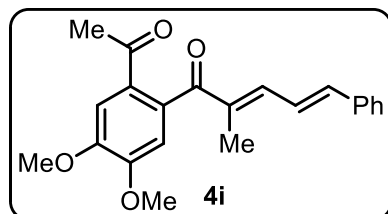

compound was prepared by following the general procedure-1 and isolated as white solid. M.P = 110-112 °C.  $R_f = 0.2$  (Hexane/EtOAc = 4/1). **IR** (thin film, neat):  $\nu_{\max}/\text{cm}^{-1}$  2933, 2851, 1672, 1646, 1614, 1448, 1344, 1279, 1206, 1021, 745.  **$^1\text{H}$**

**NMR (400 MHz,  $\text{CDCl}_3$ ):**  $\delta$  7.42 (d,  $J = 7.2$  Hz, 2H), 7.35-7.26 (m, 4H), 7.12 (dd,  $J = 15.6$  and  $11.2$  Hz, 1H), 6.82 (s, 1H), 6.65 (d,  $J = 15.6$  Hz, 1H), 6.54 (d,  $J = 11.2$  Hz, 1H), 4.00 (s, 3H), 3.95 (s, 3H), 2.48 (s, 3H), 2.20 (s, 3H).  **$^{13}\text{C}$  NMR (100 MHz,  $\text{CDCl}_3$ ):**  $\delta$  199.6, 197.0, 152.0, 148.8, 140.5, 139.5, 138.0, 136.3, 135.5, 129.8, 128.9, 128.8 (2C), 127.0 (2C), 124.3, 111.9, 110.8, 56.3, 56.2, 27.6, 12.3. **HRMS (ESI):**  $m/z$  calcd for  $\text{C}_{22}\text{H}_{23}\text{O}_4$  ( $\text{M}+\text{H}$ ) $^+$ : 351.1596. Found: 351.1580.

**3-Hydroxy-5,6-dimethoxy-3-((2E,4E)-5-phenylpenta-2,4-dien-2-yl)-2,3-dihydro-1H-inden-**

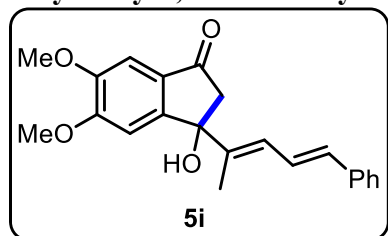

**1-one (5i).** This compound was isolated as pale yellow oil. Following the general procedure-4, 40 mg of **4i** afforded 36 mg of **5i** (90% yield).  $R_f = 0.3$  (Hexane/EtOAc = 1/1). **IR** (thin film, neat):  $\nu_{\max}/\text{cm}^{-1}$  3414, 2931, 1697, 1594, 1499, 1296,

1062, 735.  **$^1\text{H}$  NMR (400 MHz,  $\text{CDCl}_3$ ):**  $\delta$  7.42 (d,  $J = 7.5$  Hz, 2H), 7.32 (t,  $J = 7.7$  Hz, 2H), 7.26-7.23 (m, 1H), 7.16 (s, 1H), 7.02 (dd,  $J = 15.5$  and  $11.0$  Hz, 1H), 6.86 (s, 1H), 6.62 ( $J = 15.5$

Hz, 1H), 6.59 (d,  $J = 11.1$  Hz, 1H), 3.95 (s, 3H), 3.93 (s, 3H), 3.03 (d,  $J_{AB} = 18.8$  Hz, 1H), 2.83 (d,  $J_{AB} = 18.8$  Hz, 1H), 2.55 (s, 1H), 1.70 (s, 3H).  **$^{13}\text{C}$  NMR (100 MHz,  $\text{CDCl}_3$ ):**  $\delta$  201.9, 156.1, 151.9, 151.0, 139.3, 137.4, 133.4, 129.6, 128.6 (2C), 127.6, 126.3 (2C), 124.5, 124.4, 105.1, 103, 56.5, 56.2, 52.3, 13.8. **HRMS (ESI):**  $m/z$  calcd for  $\text{C}_{22}\text{H}_{23}\text{O}_4$  ( $\text{M}+\text{H}$ ) $^+$ : 351.1596. Found: 277.1575.

**(2E,4E)-1-(3-Acetylpyridin-2-yl)-2-methyl-5-phenylpenta-2,4-dien-1-one (4j).** This

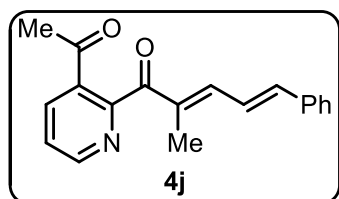

compound was prepared by following the general procedure-1 and isolated as Pale yellow oil.  $R_f = 0.2$  (Hexane/EtOAc = 3/1). **IR (thin film, neat):**  $\nu_{\text{max}}/\text{cm}^{-1}$  3057, 2926, 1687, 1614, 1565, 1434, 1360, 1277, 1021, 737.  **$^1\text{H}$  NMR (400 MHz,  $\text{CDCl}_3$ ):**  $\delta$  8.77 (dd,  $J = 4.8$

and 1.6 Hz, 1H), 8.14 (dd,  $J = 8.0$  and 1.6 Hz, 1H), 7.50 (dd, 8.0 and 4.8 Hz, 1H), 7.45-7.43 (m, 2H), 7.36-7.29 (m, 3H), 7.19 (dd,  $J = 15.5$  and 11.2 Hz, 1H), 6.77-6.70 (m, 2H), 2.56 (s, 3H), 2.22 (d,  $J = 0.9$  Hz, 3H).  **$^{13}\text{C}$  NMR (100 MHz,  $\text{CDCl}_3$ ):**  $\delta$  197.9, 196.4, 158.2, 151.3, 143.6, 140.6, 136.8, 136.3, 135.6, 133.1, 129.0, 128.8 (2C), 127.2 (2C), 124.2, 123.6, 28.0, 11.8. **HRMS (ESI):**  $m/z$  calcd for  $\text{C}_{19}\text{H}_{18}\text{NO}_2$  ( $\text{M}+\text{H}$ ) $^+$ : 292.1338. Found: 292.1353.

**7-Hydroxy-7-((2E,4E)-5-phenylpenta-2,4-dien-2-yl)-6,7-dihydro-5H-cyclopenta[b]pyridin-**

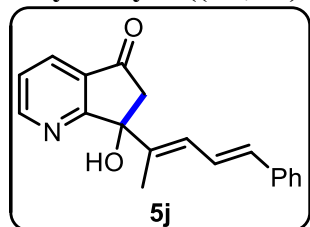

**5-one (5j).** This compound was isolated as colourless oil. Following the general procedure-4, 30 mg of **4j** afforded 25.5 mg of **5j** (85% yield).  $R_f = 0.2$  (Hexane/EtOAc = 1/1). **IR (thin film, neat):**  $\nu_{\text{max}}/\text{cm}^{-1}$  3416, 3031, 2927, 1722, 1584, 1422, 1280, 1067, 750.  **$^1\text{H}$  NMR (400**

**MHz,  $\text{CDCl}_3$ ):**  $\delta$  8.87 (dd,  $J = 8.8$  and 1.6 Hz, 1H), 8.09 (dd,  $J = 7.8$  and 2.4 Hz, 1H), 7.46 (dd,  $J = 7.8$  and 4.8 Hz, 1H), 7.38-7.36 (m, 2H), 7.32-7.27 (m, 2H), 7.24-7.20 (m, 1H), 6.98 (dd,  $J = 15.2$  and 11.0 Hz, 1H), 6.56 (d,  $J = 15.2$  Hz, 1H), 6.41 (d,  $J = 11.0$  Hz, 1H), 3.80 (s, 1H), 3.04 (s, 2H), 1.74 (d,  $J = 0.9$  Hz, 3H).  **$^{13}\text{C}$  NMR (100 MHz,  $\text{CDCl}_3$ ):**  $\delta$  201.0, 174.4, 156.0, 138.6, 137.4, 133.8, 132.2, 130.0, 128.6 (2C), 127.6, 126.4 (2C), 125.5, 124.3, 124.2, 80.2, 51.2, 13.9. **HRMS (ESI):**  $m/z$  calcd for  $\text{C}_{19}\text{H}_{16}\text{NO}$  ( $\text{M}-\text{OH}$ ) $^+$ : 274.1232. Found: 274.1247.

**(2E,4E)-1-(3-Acetyl-2H-chromen-4-yl)-2-methyl-5-phenylpenta-2,4-dien-1-one (4k).** This

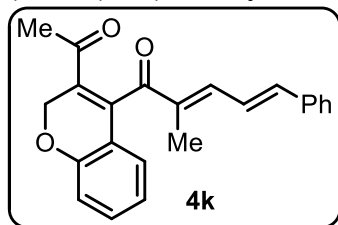

compound was prepared by following the general procedure-1 and isolated as Pale yellow oil.  $R_f = 0.6$  (Hexane/EtOAc = 4/1). **IR (thin film, neat):**  $\nu_{\max}/\text{cm}^{-1}$  3427, 2962, 2927, 1710, 1602, 1461, 1378, 1287, 1060, 767.  **$^1\text{H}$  NMR (400 MHz,  $\text{CDCl}_3$ ):**  $\delta$  7.45-7.43 (m, 2H), 7.36-7.27 (m, 5H), 7.13 (dd,  $J = 15.2$  and  $11.2$  Hz, 1H), 7.00-6.89 (m, 4H), 6.80 (d,  $J = 15.2$  Hz, 1H), 5.06 (s, 2H), 2.23 (s, 3H), 2.18 (s, 3H).  **$^{13}\text{C}$  NMR (100 MHz,  $\text{CDCl}_3$ ):**  $\delta$  197.9, 194.8, 154.8, 143.7, 142.8, 141.6, 136.1, 136.0, 132.5, 129.3, 128.8 (2C), 127.3 (2C), 126.2, 123.8, 122.4, 120.8, 116.7, 64.7, 29.0, 11.4. **HRMS (ESI):**  $m/z$  calcd for  $\text{C}_{23}\text{H}_{20}\text{O}_3$  (M) $^+$ : 344.1412. Found: 344.1414.

**1-Hydroxy-1-((2E,4E)-5-phenylpenta-2,4-dien-2-yl)-1,2-dihydrocyclopenta[c]chromen-**

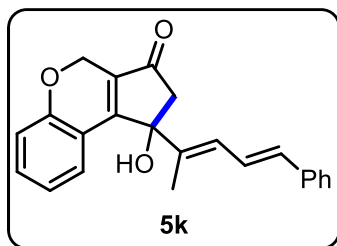

**3(4H)-one (5k).** This compound was isolated as pale yellow oil. Following the general procedure-4, 30 mg of **4k** afforded 28.8 mg of **5k** (96% yield).  $R_f = 0.5$  (Hexane/EtOAc = 3/1). **IR (thin film, neat):**  $\nu_{\max}/\text{cm}^{-1}$  3419, 3034, 2925, 2859, 1697, 1633, 1483, 1397, 1345, 1041, 753.  **$^1\text{H}$  NMR (400 MHz,  $\text{CDCl}_3$ ):**  $\delta$  7.52 (d,  $J = 7.1$  Hz, 1H), 7.43-7.41 (m, 2H), 7.33-7.20 (m, 2H), 7.01 (dd,  $J = 10.8$  Hz, 1H), 6.63 (d,  $J = 15.4$  Hz, 1H), 5.06 (d,  $J_{AB} = 14.8$  Hz, 1H), 5.02 (d,  $J_{AB} = 14.8$  Hz, 1H), 3.07 (s, 1H), 2.79 (d,  $J_{AB} = 18.6$  Hz, 1H), 2.69 (d,  $J_{AB} = 18.6$  Hz, 1H), 1.78 (s, 3H).  **$^{13}\text{C}$  NMR (100 MHz,  $\text{CDCl}_3$ ):**  $\delta$  201.0, 162.1, 156.2, 137.6, 137.3, 133.6, 133.5, 131.5, 128.6, (2C), 127.7, 126.8, 126.4 (2C), 124.9, 124.4, 121.9, 117.8, 116.9, 80.4, 62.7, 52.1, 13.4. **HRMS (ESI):**  $m/z$  calcd for  $\text{C}_{23}\text{H}_{21}\text{O}_3$  (M+H) $^+$ : 345.1491. Found: 345.1479.

**(2E,4E)-1-(3-Acetylbenzo[b]thiophen-2-yl)-2-methyl-5-phenylpenta-2,4-dien-1-one (4l).** This

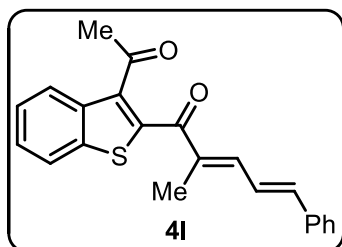

compound was prepared by following the general procedure-2 and isolated as Pale yellow oil.  $R_f = 0.4$  (Hexane/EtOAc = 4/1). **IR (thin film, neat):**  $\nu_{\max}/\text{cm}^{-1}$  3050, 2927, 2854, 1676, 1641, 1608, 1502, 1428, 1282, 1225, 756.  **$^1\text{H}$  NMR (400 MHz,  $\text{CDCl}_3$ ):**  $\delta$  8.26-8.24 (m, 1H), 7.88-7.86 (m, 1H), 7.51-7.45 (m, 4H), 7.37-7.31 (m, 3H), 7.21-7.11 (m, 2H), 6.85 (d,  $J = 10.4$  Hz, 1H), 2.47 (s, 3H), 2.21 (s, 3H).  **$^{13}\text{C}$  NMR (100**



**MHz, CDCl<sub>3</sub>):**  $\delta$  196.3, 192.0, 145.2, 145.1, 142.3, 139.5, 137.3, 137.1, 136.6, 135.9, 129.5, 128.9 (2C), 127.5 (2C), 126.5, 126.0, 125.2, 123.5, 122.2, 31.5, 12.3. **HRMS (ESI):**  $m/z$  calcd for C<sub>22</sub>H<sub>19</sub>O<sub>2</sub>S (M+H)<sup>+</sup>: 347.1106. Found: 347.1123.

**3-Hydroxy-3-((2E,4E)-5-phenylpenta-2,4-dien-2-yl)-2,3-dihydro-1H benzo[b]cyclopenta[d]-**

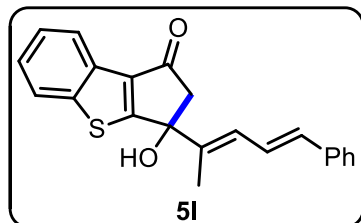

**thiophen-1-one (5l).** This compound was isolated white solid. Following the general procedure-4, 30 mg of **4l** afforded 26.5 mg of **5l** (88% yield). M.P =126-129 °C. R<sub>f</sub> = 0.3 (Hexane/EtOAc = 4/1). **IR (thin film, neat):**  $\nu_{\max}/\text{cm}^{-1}$  3410, 3057, 2927, 1695,

1466, 1385, 966, 736. **<sup>1</sup>H NMR (400 MHz, CDCl<sub>3</sub>):**  $\delta$  8.18-8.16 (m, 1H), 7.79-7.77 (m, 1H), 7.46-7.38 (m, 4H), 7.32-7.29 (m, 2H), 7.24-7.20 (m, 1H), 6.98 (dd,  $J$  = 15.7 and 10.7 Hz, 1H), 6.60 (d,  $J$  = 15.2 Hz, 1H), 6.59 (d,  $J$  = 10.6 Hz, 1H), 3.29 (d,  $J_{\text{AB}}$  = 18.3 Hz, 1H), 3.25 (s, 1H), 3.16 (d,  $J_{\text{AB}}$  = 18.3 Hz, 1H), 1.84 (s, 3H). **<sup>13</sup>C NMR (100 MHz, CDCl<sub>3</sub>):**  $\delta$  195.0, 175.8, 145.2, 140.5, 137.8, 137.3, 134.3, 130.7, 128.7 (2C), 127.8, 126.5 (2C), 126.4, 126.2, 125.3, 124.2, 123.9, 123.5, 79.1, 56.7, 13.6. **HRMS (ESI):**  $m/z$  calcd for C<sub>22</sub>H<sub>18</sub>OS (M-OH)<sup>+</sup>: 329.1000. Found: 329.1017.

**(2E,4E)-2-Methyl-5-phenyl-1-(2-propionylphenyl)penta-2,4-dien-1-one (4m).** This

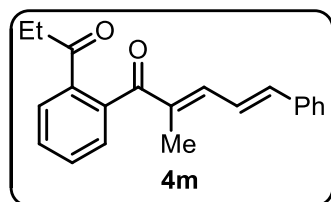

compound was prepared by following the general procedure-1 and isolated as Pale yellow oil. R<sub>f</sub> = 0.4 (Hexane/EtOAc = 4/1). **IR (thin film, neat):**  $\nu_{\max}/\text{cm}^{-1}$  3126, 3060, 2848, 2749, 1699, 1642, 1601, 1476, 1360, 1242, 1011, 746. **<sup>1</sup>H NMR (400 MHz, CDCl<sub>3</sub>):**  $\delta$  7.85

(dd,  $J$  = 7.9 and 1.2 Hz, 1H), 7.58-7.50 (m, 2H), 7.43-7.40 (m, 2H), 7.35-7.25 (m, 4H), 7.13 (dd,  $J$  = 15.4 and 11.2 Hz, 1H), 6.64 (d,  $J$  = 15.4 Hz, 1H), 6.58 (d,  $J$  = 11.2 Hz, 1H), 2.91 (q,  $J$  = 7.2 Hz, 2H), 2.20 (d,  $J$  = 0.9 Hz, 3H), 1.13 (t,  $J$  = 7.2 Hz, 3H). **<sup>13</sup>C NMR (100 MHz, CDCl<sub>3</sub>):**  $\delta$  201.5, 199.8, 141.2, 139.5, 137.6, 137.3, 136.4, 131.7, 129.2, 128.9, 128.8 (2C), 128.7, 128.6, 128.3, 127.1 (2C), 124.3, 33.0, 12.2, 8.1. **HRMS (ESI):**  $m/z$  calcd for C<sub>21</sub>H<sub>21</sub>O<sub>2</sub> (M+H)<sup>+</sup>: 305.1542. Found: 305.1533.

**3-Hydroxy-2-methyl-3-((2E,4E)-5-phenylpenta-2,4-dien-2-yl)-2,3-dihydro-1H-inden-1-one (5m).** This compound was isolated as white solid. Following the general procedure-4, 30 mg of

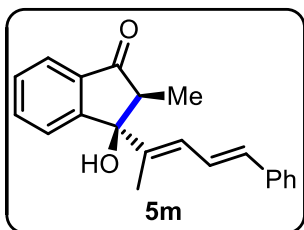

**4m** afforded 24.3 mg of **5m** (81% yield). M.P = 153-155 °C.  $R_f$  = 0.4 (Hexane/EtOAc = 4/1). **IR (thin film, neat):**  $\nu_{\max}/\text{cm}^{-1}$  3419, 2927, 2855, 1708, 1600, 1455, 1265, 752.  **$^1\text{H}$  NMR (400 MHz,  $\text{CDCl}_3$ ):**  $\delta$  7.79 (d,  $J$  = 7.6 Hz, 1H), 7.67 (dt,  $J$  = 7.5 and 1.2 Hz, 1H), 7.52-7.43 (m, 4H), 7.33 (t,  $J$  = 7.8 Hz, 2H), 7.25 (t,  $J$  = 7.8 Hz, 1H), 7.07 (d,  $J$  = 11.1 Hz, 1H), 6.66 (d,  $J$  = 15.6 Hz, 1H), 2.87 (q,  $J$  = 7.3 Hz, 2H), 1.98 (s, 1H), 1.76 (d,  $J$  = 0.8 Hz, 3H), 1.26 (d,  $J$  = 7.3 Hz, 3H).  **$^{13}\text{C}$  NMR (100 MHz,  $\text{CDCl}_3$ ):**  $\delta$  206.4, 155.8, 138.3, 137.5, 135.7, 135.3, 133.4, 129.7, 128.6 (2C), 127.6, 126.4 (2C), 125.6, 124.5, 123.7, 81.3, 52.1, 14.3, 9.0. **HRMS (ESI):**  $m/z$  calcd for  $\text{C}_{21}\text{H}_{19}\text{O}$  (M-OH) $^+$ : 287.1436. Found: 287.1429.

**(2E,4E)-1-(4,5-Dimethoxy-2-propionylphenyl)-2-methyl-5-phenylpenta-2,4-dien-1-one (4n).**

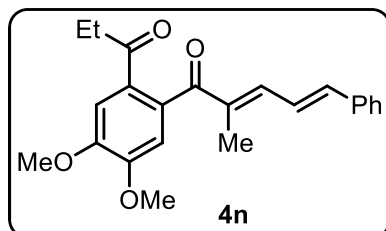

This compound was prepared by following the general procedure-1 and isolated as white solid.  $R_f$  = 0.3 (Hexane/EtOAc = 3/1). **IR (thin film, neat):**  $\nu_{\max}/\text{cm}^{-1}$  2937, 1646, 1614, 1355, 1277, 1020, 743.  **$^1\text{H}$  NMR (400 MHz,  $\text{CDCl}_3$ ):**  $\delta$  7.44-7.42 (m, 2H), 7.35-7.28 (m, 4H), 7.11 (dd,  $J$  = 15.3 and 11.2 Hz, 1H), 6.83 (s, 1H), 6.65 (d,  $J$  = 15.3 Hz, 1H), 6.55 (dd,  $J$  = 11.2 and 1.0 Hz, 1H), 3.99 (s, 3H), 3.94 (s, 3H), 2.84 (q,  $J$  = 7.2 Hz, 2H), 2.20 (d,  $J$  = 1.0 Hz, 3H), 1.13 (t,  $J$  = 7.2 Hz, 3H).  **$^{13}\text{C}$  NMR (100 MHz,  $\text{CDCl}_3$ ):**  $\delta$  200.1, 199.5, 151.7, 148.9, 140.6, 139.4, 137.9, 136.4, 135.3, 130.0, 128.9, 128 (2C), 127.0 (2C), 124.2, 111.2, 110.9, 56.2 (2C), 33.0, 12.3, 8.3. **HRMS (ESI):**  $m/z$  calcd for  $\text{C}_{23}\text{H}_{25}\text{O}_4$  (M+H) $^+$ : 365.1753. Found: 365.1741.

**3-Hydroxy-5,6-dimethoxy-2-methyl-3-((2E,4E)-5-phenylpenta-2,4-dien-2-yl)-2,3-dihydro-**

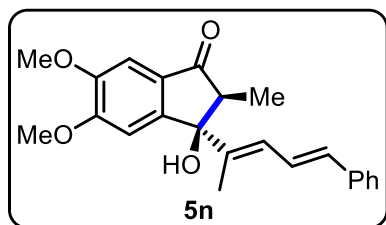

**1H-inden-1-one (5n).** This compound was isolated as pale yellow oil. Following the general procedure-4, 30 mg of **4n** afforded 25.0 mg of **5n** (83% yield).  $R_f$  = 0.3 (Hexane/EtOAc = 2/1). **IR (thin film, neat):**  $\nu_{\max}/\text{cm}^{-1}$  3444, 2971, 2936, 1697, 1595, 1499, 1293, 1111, 749.  **$^1\text{H}$  NMR (400 MHz,  $\text{CDCl}_3$ ):**  $\delta$  7.44-7.40 (m, 2H), 7.34-7.29 (m, 2H), 7.18 (s, 1H), 7.00 (dd,  $J$  = 15.4 and 11.0 Hz, 1H), 6.92 (s, 1H), 6.63 (d,  $J$  = 11.1 Hz, 1H), 6.59 (d,  $J$  = 15.4 Hz, 1H), 3.95 (s, 3H), 3.94 (s, 3H), 2.87 (q,  $J$  = 7.3 Hz, 2H), 1.68 (s, 1H), 1.47 (s, 3H), 1.17 (d,  $J$  = 7.3 Hz, 3H).  **$^{13}\text{C}$  NMR (100 MHz,  $\text{CDCl}_3$ ):**  $\delta$  203.0, 155.8, 150.7, 138.5,

137.4, 133.2, 129.0, 128.6 (2C), 127.6, 126.3 (2C), 126.0, 125.2, 124.6, 105.1, 103.3, 83.4, 57.4, 56.4, 56.2, 15.1, 9.9. **HRMS (ESI):**  $m/z$  calcd for  $C_{23}H_{23}O_3$  (M-OH)<sup>+</sup>: 347.1647. Found: 347.1634.

**(2E,4E)-2-Methyl-5-phenyl-1-(3-propionylbenzo[*b*]thiophen-2-yl)penta-2,4-dien-1-one (4o).**

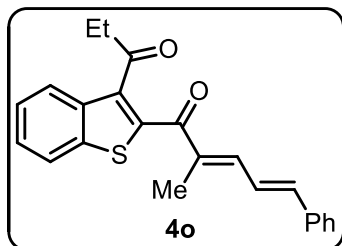

This compound was prepared by following the general procedure-2 and isolated as Pale yellow oil.  $R_f = 0.5$  (Hexane/EtOAc = 4/1). **IR (thin film, neat):**  $\nu_{\max}/\text{cm}^{-1}$  3057, 2980, 2937, 1675, 1606, 1502, 1456, 1361, 1282, 1226, 1069, 740. **<sup>1</sup>H NMR (400 MHz, CDCl<sub>3</sub>):**  $\delta$  8.11-8.08 (m, 1H), 7.87-7.85 (m, 1H), 7.49-7.45 (m, 4H), 7.37-

7.30 (m, 3H), 7.19-7.11 (m, 2H), 6.84 (d,  $J = 14.4$  Hz, 1H), 2.73 (q,  $J = 7.2$  Hz, 2H), 2.20 (s, 3H), 1.14 (t,  $J = 7.2$  Hz, 3H). **<sup>13</sup>C NMR (100 MHz, CDCl<sub>3</sub>):**  $\delta$  200.5, 191.6, 144.7, 143.3, 142.1, 139.9, 138.6, 137.0, 136.8, 136.0, 19.4, 128.9 (2C), 127.5 (2C), 126.7, 125.9, 124.9, 123.4, 122.3, 37.8, 12.4, 8.3. **HRMS (ESI):**  $m/z$  calcd for  $C_{23}H_{21}O_2S$  (M+H)<sup>+</sup>: 361.1262. Found: 361.1244.

**3-Hydroxy-2-methyl-3-((2E,4E)-5-phenylpenta-2,4-dien-2-yl)-2,3-dihydro-1H-benzo[*b*]cyclopenta[*d*]thiophen-1-one (5o).**

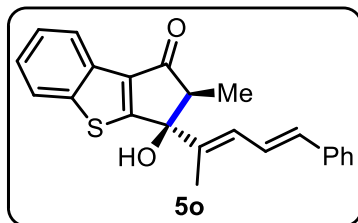

**clopenta[*d*]thiophen-1-one (5o).** This compound was isolated as pale yellow oil. Following the general procedure-4, 30 mg of **4o** afforded 26.5 mg of **5o** (88% yield).  $R_f = 0.3$  (Hexane/EtOAc = 3/1). **IR (thin film, neat):**  $\nu_{\max}/\text{cm}^{-1}$  3422, 3057, 2978, 2933,

1690, 1463, 1387, 1093, 746. **<sup>1</sup>H NMR (400 MHz, CDCl<sub>3</sub>):**  $\delta$  8.23-8.21 (m, 1H), 7.82 (d,  $J = 7.6$  Hz, 1H), 7.49-7.38 (m, 4H), 7.30 (t,  $J = 7.7$  Hz, 1H), 7.24-7.20 (m, 1H), 7.00 (dd,  $J = 15.4$  Hz and 11.0 Hz, 1H), 6.57 (d,  $J = 15.4$  Hz, 1H), 6.47 (d,  $J = 10.9$  Hz, 1H), 3.23 (q,  $J = 7.5$  Hz, 2H), 3.07 (s, 1H), 1.70 (s, 3H), 1.20 (d,  $J = 7.5$  Hz, 3H). **<sup>13</sup>C NMR (100 MHz, CDCl<sub>3</sub>):**  $\delta$  196.9, 174.0, 145.0, 139.7, 137.2, 136.9, 134.0, 130.8, 128.6 (2C), 127.7, 127.2, 127.6 (2C), 126.3, 126.1, 124.2, 124.1, 123.4, 82.9, 61.7, 14.9, 10.8. **HRMS (ESI):**  $m/z$  calcd for  $C_{23}H_{21}O_2S$  (M+H)<sup>+</sup>: 361.1262. Found: 361.1247.

**Crystal structure of 5m (CCDC 1865325):** Structure of the **5m** was confirmed by single crystal X-ray diffraction analysis.

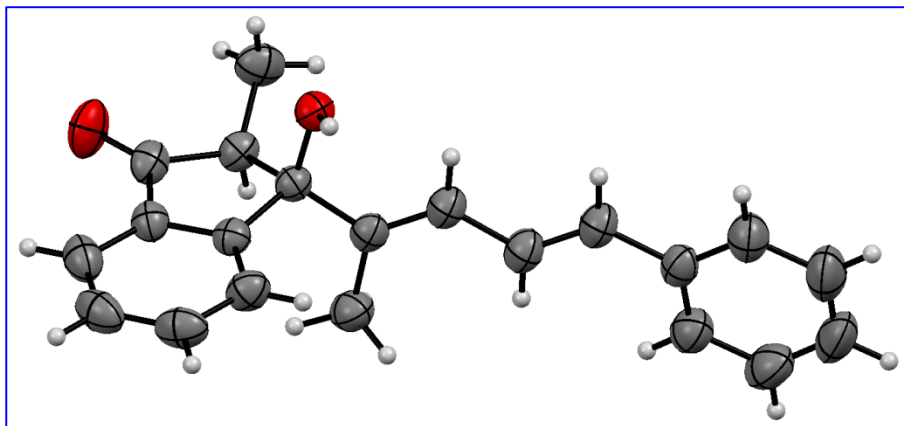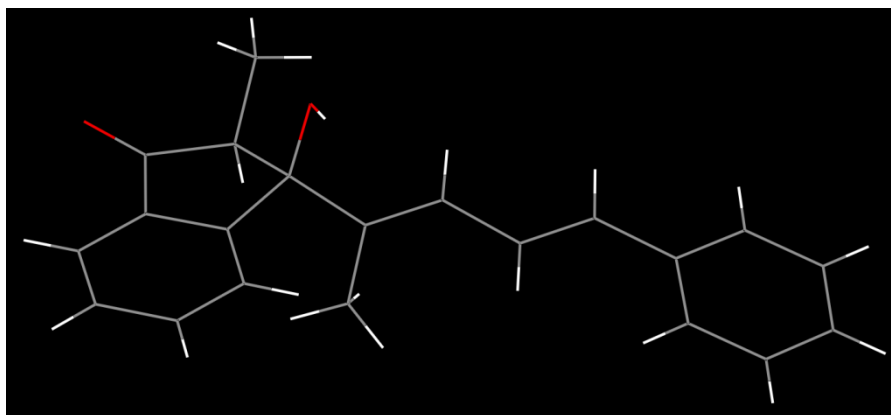

**Crystal Data** for  $C_{21}H_{20}O_2$  ( $M=304.39$  g/mol): triclinic, space group P-1 (no. 2),  $a = 6.299(4)$  Å,  $b = 11.213(7)$  Å,  $c = 12.297(8)$  Å,  $\alpha = 92.294(8)^\circ$ ,  $\beta = 92.253(9)^\circ$ ,  $\gamma = 96.879(8)^\circ$ ,  $V = 860.7(9)$  Å<sup>3</sup>,  $Z = 2$ ,  $T = 296.15$  K,  $\mu(\text{Mo K}\alpha) = 0.074$  mm<sup>-1</sup>,  $D_{\text{calc}} = 1.1744$  g/cm<sup>3</sup>, 10039 reflections measured ( $3.32^\circ \leq 2\theta \leq 49.78^\circ$ ), 3003 unique ( $R_{\text{int}} = 0.0263$ ,  $R_{\text{sigma}} = 0.0240$ ) which were used in all calculations. The final  $R_1$  was 0.0391 ( $I \geq 2\sigma(I)$ ) and  $wR_2$  was 0.1119 (all data).

**Table 1S: Crystal data and structure refinement for 5m**

| Identification code | 5m                |
|---------------------|-------------------|
| Empirical formula   | $C_{21}H_{20}O_2$ |
| Formula weight      | 304.39            |
| Temperature/K       | 296.15            |
| Crystal system      | triclinic         |
| Space group         | P-1               |

|                                                         |                                                                |
|---------------------------------------------------------|----------------------------------------------------------------|
| <b>a/Å</b>                                              | 6.299(4)                                                       |
| <b>b/Å</b>                                              | 11.213(7)                                                      |
| <b>c/Å</b>                                              | 12.297(8)                                                      |
| <b><math>\alpha</math>/°</b>                            | 92.294(8)                                                      |
| <b><math>\beta</math>/°</b>                             | 92.253(9)                                                      |
| <b><math>\gamma</math>/°</b>                            | 96.879(8)                                                      |
| <b>Volume/Å<sup>3</sup></b>                             | 860.7(9)                                                       |
| <b>Z</b>                                                | 2                                                              |
| <b><math>\rho_{\text{calc}}/\text{g/cm}^3</math></b>    | 1.1744                                                         |
| <b><math>\mu/\text{mm}^{-1}</math></b>                  | 0.074                                                          |
| <b>F(000)</b>                                           | 324.2                                                          |
| <b>Crystal size/mm<sup>3</sup></b>                      | 0.2 × 0.15 × 0.15                                              |
| <b>Radiation</b>                                        | Mo K $\alpha$ ( $\lambda$ = 0.71073)                           |
| <b>2<math>\theta</math> range for data collection/°</b> | 3.32 to 49.78                                                  |
| <b>Index ranges</b>                                     | -7 ≤ h ≤ 7, -13 ≤ k ≤ 13, -14 ≤ l ≤ 14                         |
| <b>Reflections collected</b>                            | 10039                                                          |
| <b>Independent reflections</b>                          | 3003 [ $R_{\text{int}}$ = 0.0263, $R_{\text{sigma}}$ = 0.0240] |
| <b>Data/restraints/parameters</b>                       | 3003/0/212                                                     |
| <b>Goodness-of-fit on F<sup>2</sup></b>                 | 1.063                                                          |
| <b>Final R indexes [<math>I \geq 2\sigma(I)</math>]</b> | $R_1$ = 0.0391, $wR_2$ = 0.1025                                |
| <b>Final R indexes [all data]</b>                       | $R_1$ = 0.0497, $wR_2$ = 0.1119                                |
| <b>Largest diff. peak/hole / e Å<sup>-3</sup></b>       | 0.17/-0.19                                                     |

SpinWorks 4: BS 08 01  
 PROTON CDCl3 /opt/topspin3.5pl2/nmrdata nmrsu 21

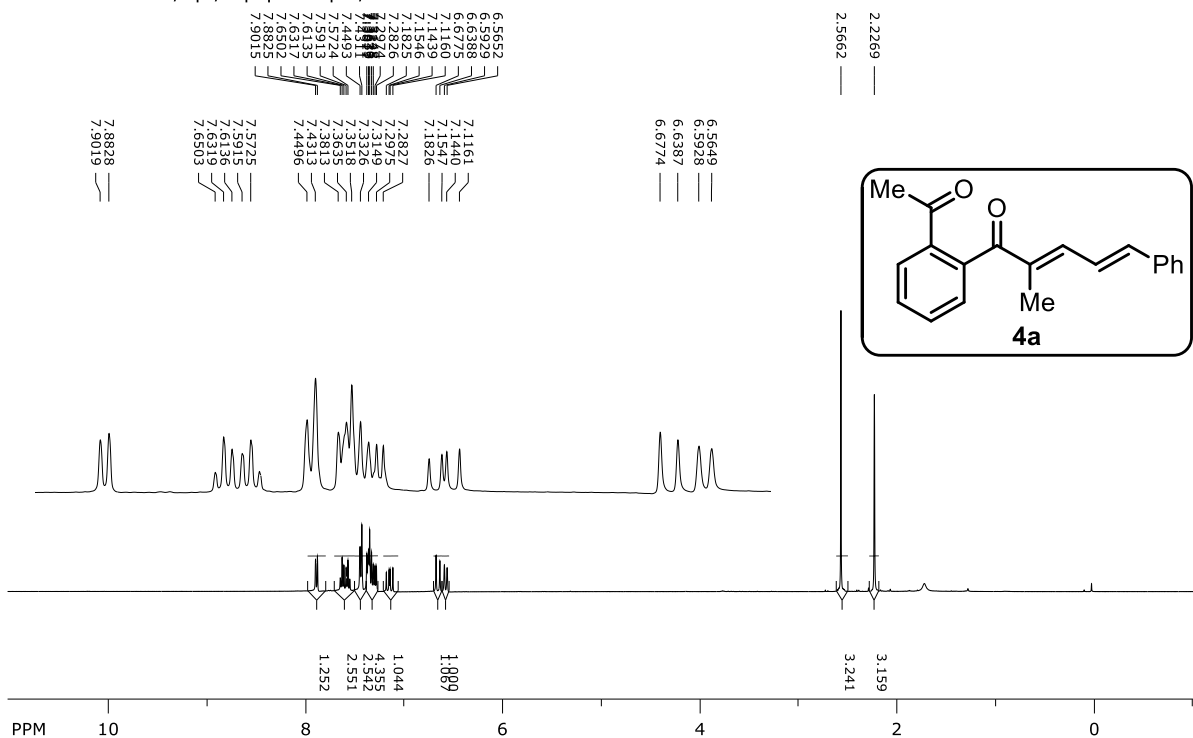

SpinWorks 4: BS 08 01  
 C13CPD256 CDCl3 /opt/topspin3.5pl2/nmrdata nmrsu 21

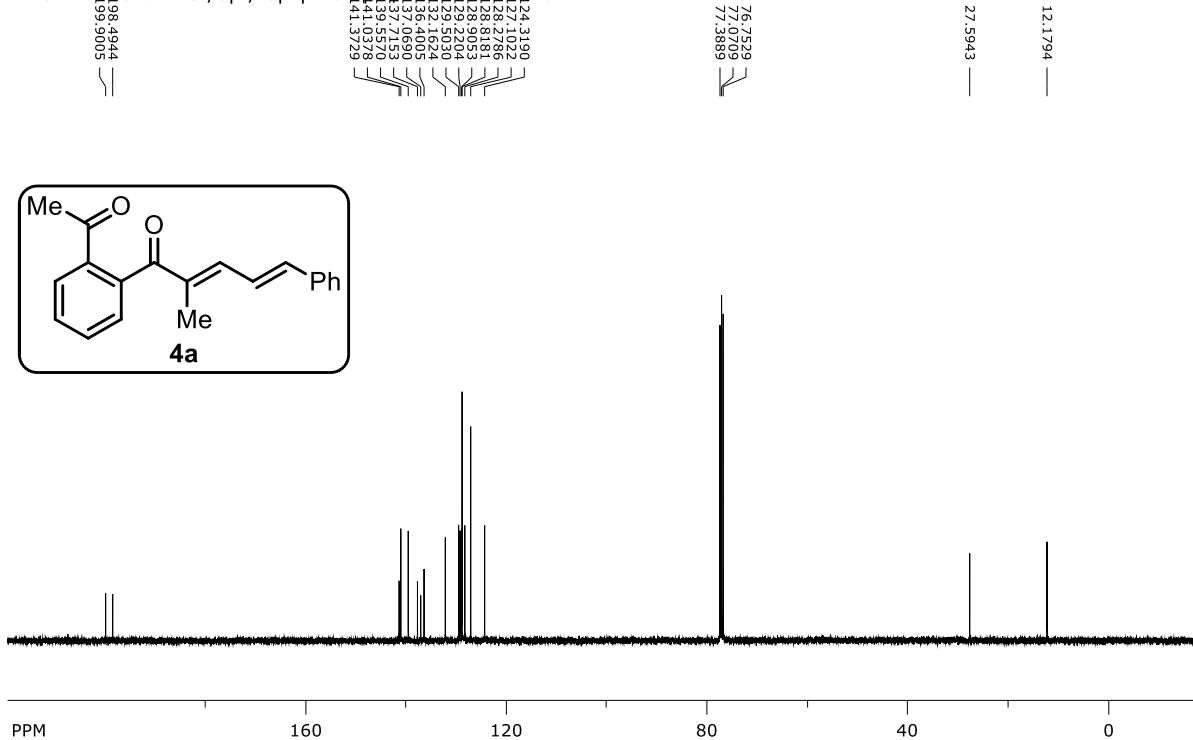



SpinWorks 4: BS-08-13

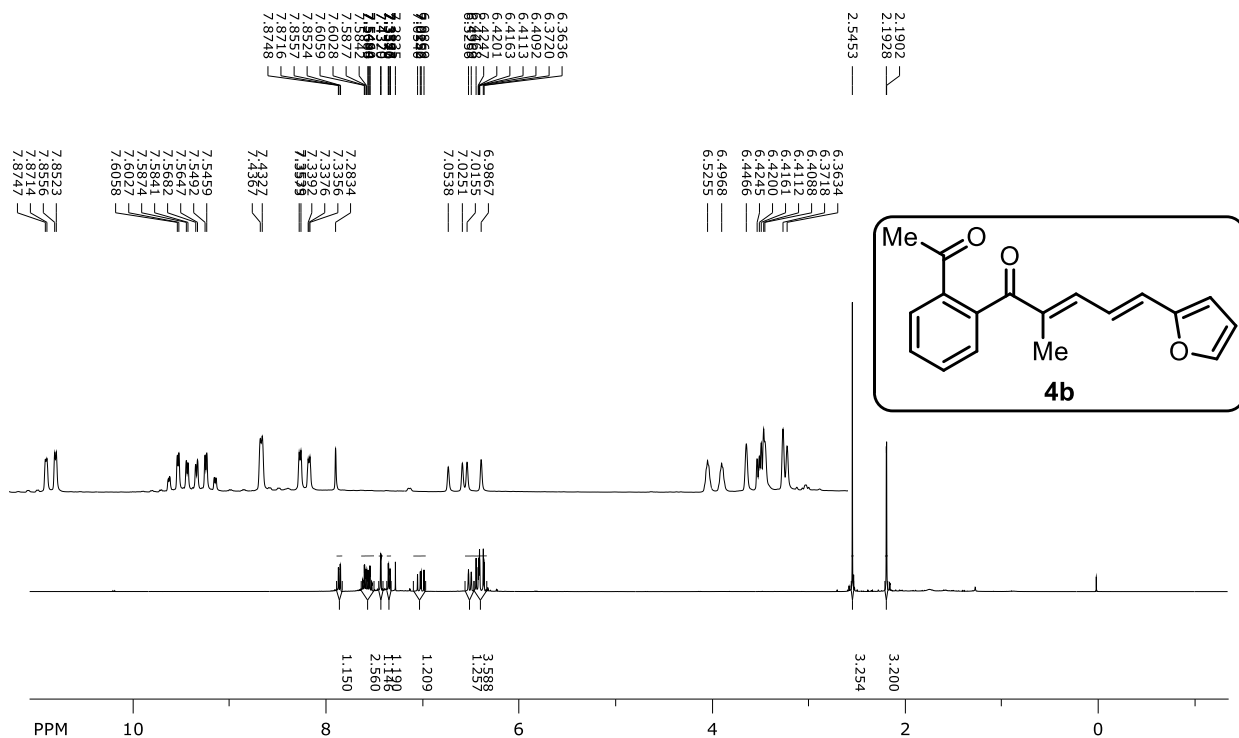

SpinWorks 4: BS 08 13

C13CPD256 CDCl<sub>3</sub> /opt/topspin3.5pl2/bmrdata\_nmrso\_10

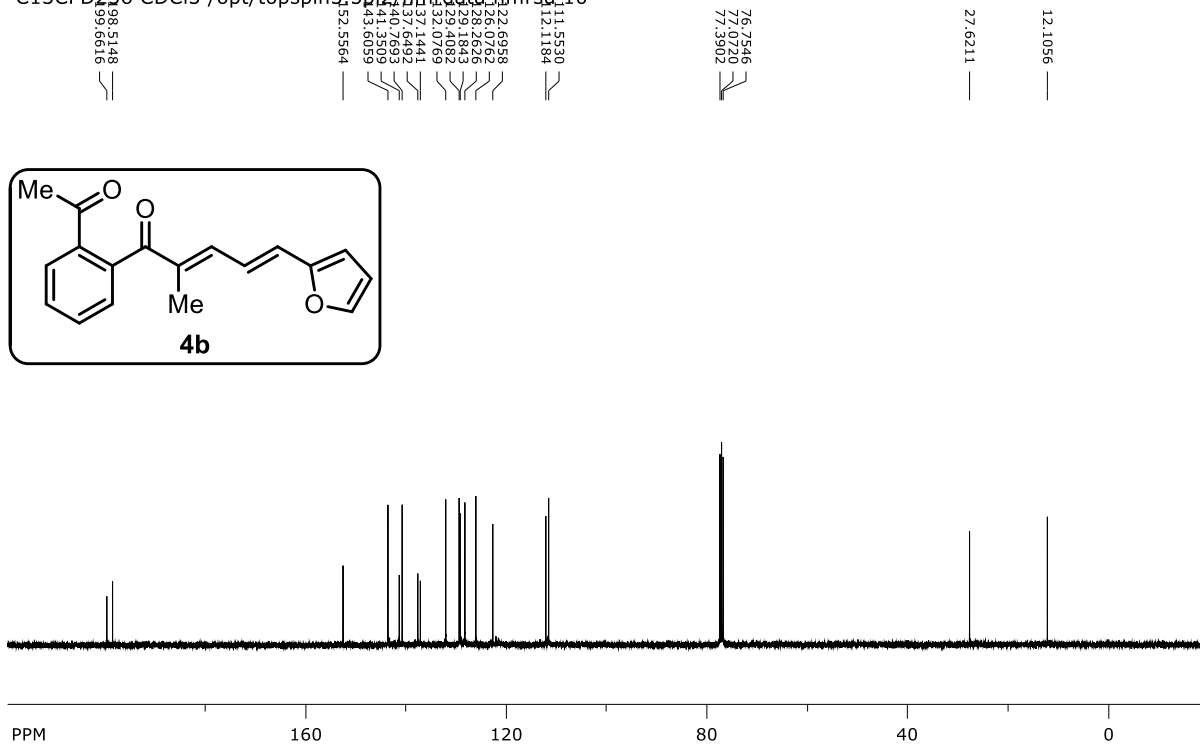



SpinWorks 4: BS-09-41

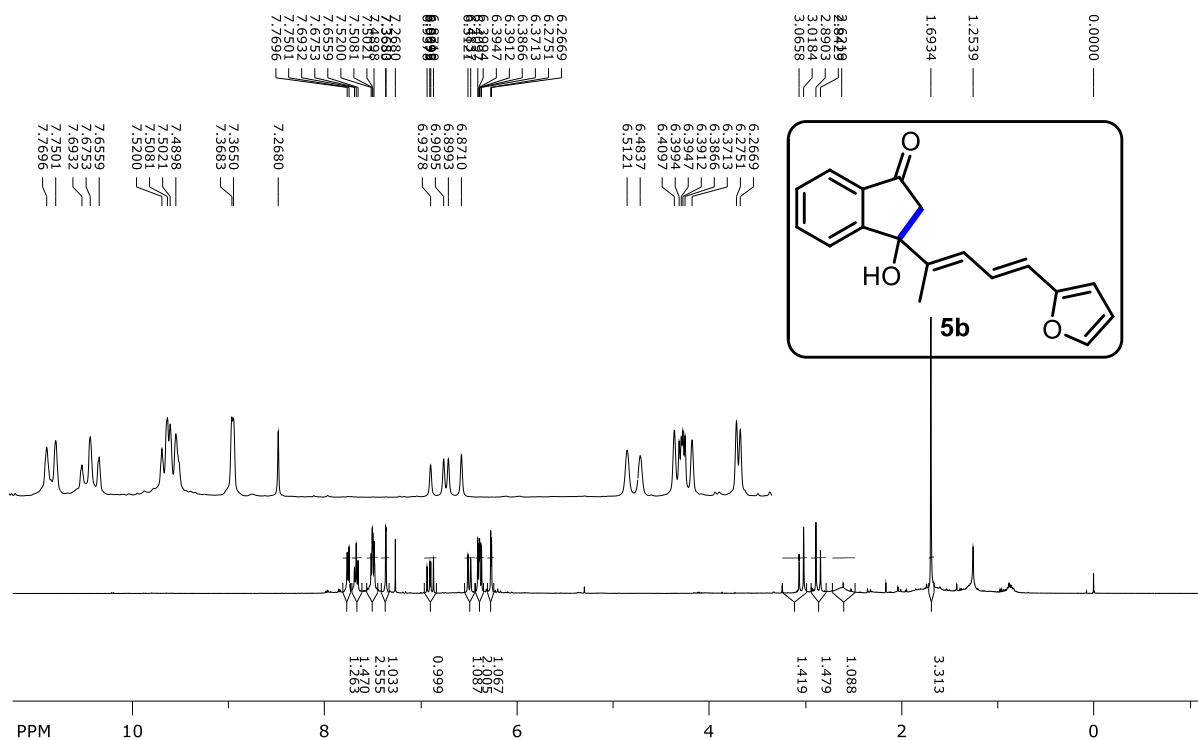

SpinWorks 4: BS-08-140

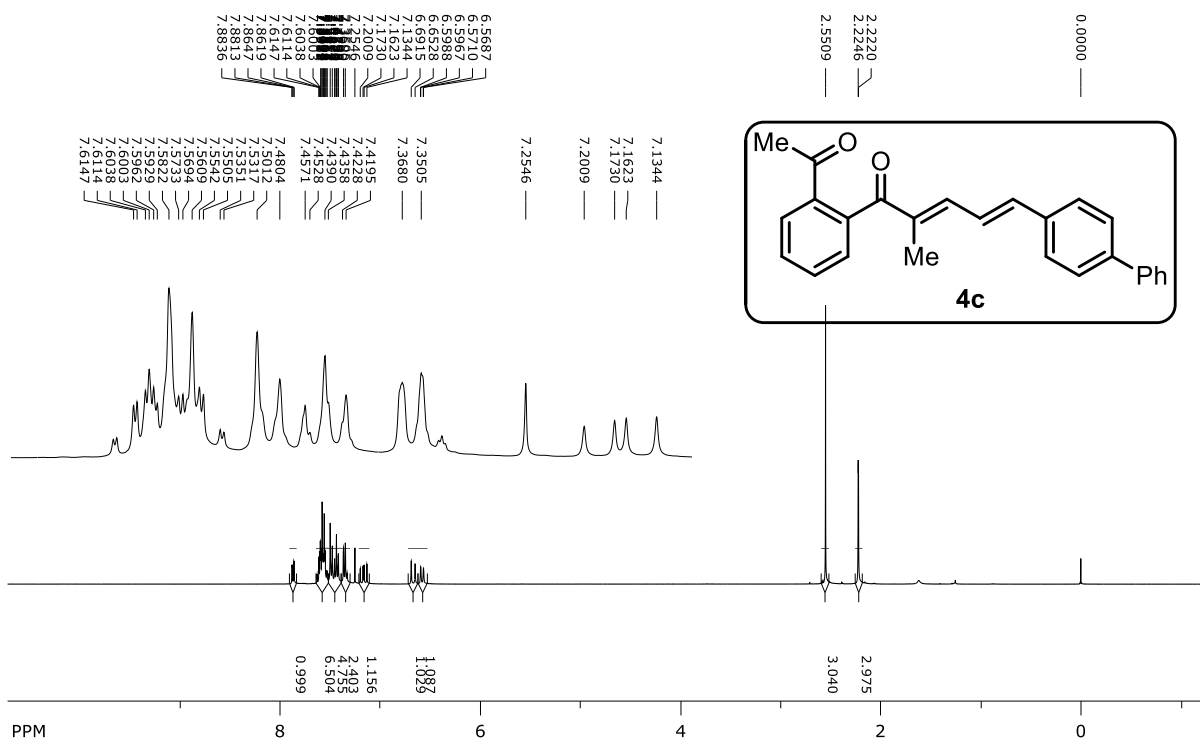

SpinWorks 4: BS 08 140

C13CPD256 CDCI3 /opt/topspin3.5/pl2/nmrdata/nmr su 27

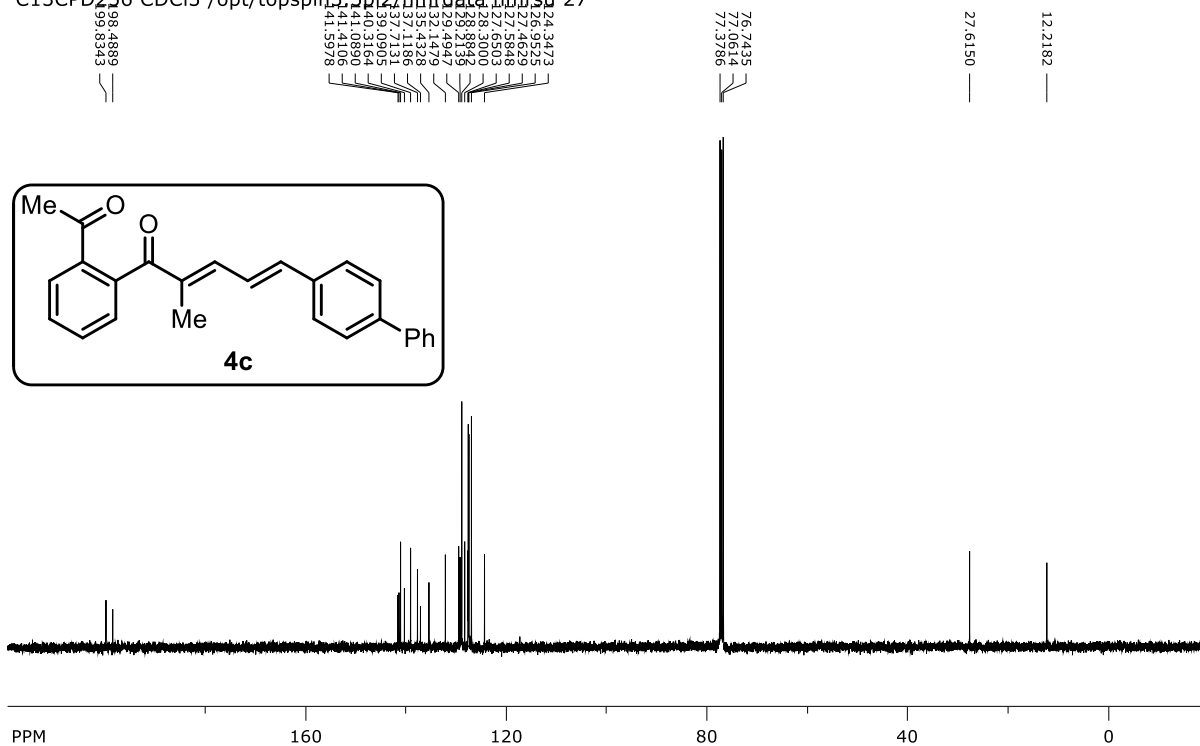

**<sup>1</sup>H NMR spectrum of compound 5c in CDCl<sub>3</sub>.**

**Chemical structure of 5c:** 2-hydroxy-2-(4-phenylbut-3-en-1-yl)-1,3-dihydroisobenzofuran-1-one. The structure is shown with a blue highlight on the C2-C3 bond.

**Peak list (Chemical Shift, ppm):**

- 7.7623, 7.7604, 7.7442, 7.7415, 7.6964, 7.6756, 7.6742, 7.6561, 7.6536, 7.6301, 7.6283, 7.6239, 7.6201, 7.6183, 7.6163, 7.6123, 7.6012, 7.5993, 7.5976, 7.5933, 7.5893, 7.5856, 7.5842, 7.5828, 7.5810, 7.5792, 7.5774, 7.5756, 7.5738, 7.5720, 7.5702, 7.5684, 7.5666, 7.5648, 7.5630, 7.5612, 7.5594, 7.5576, 7.5558, 7.5540, 7.5522, 7.5504, 7.5486, 7.5468, 7.5450, 7.5432, 7.5414, 7.5396, 7.5378, 7.5360, 7.5342, 7.5324, 7.5306, 7.5288, 7.5270, 7.5252, 7.5234, 7.5216, 7.5198, 7.5180, 7.5162, 7.5144, 7.5126, 7.5108, 7.5090, 7.5072, 7.5054, 7.5036, 7.5018, 7.4999, 7.4981, 7.4963, 7.4945, 7.4927, 7.4909, 7.4891, 7.4873, 7.4855, 7.4837, 7.4819, 7.4801, 7.4783, 7.4765, 7.4747, 7.4729, 7.4711, 7.4693, 7.4675, 7.4657, 7.4639, 7.4621, 7.4603, 7.4585, 7.4567, 7.4549, 7.4531, 7.4513, 7.4495, 7.4477, 7.4459, 7.4441, 7.4423, 7.4405, 7.4387, 7.4369, 7.4351, 7.4333, 7.4315, 7.4297, 7.4279, 7.4261, 7.4243, 7.4225, 7.4207, 7.4189, 7.4171, 7.4153, 7.4135, 7.4117, 7.4099, 7.4081, 7.4063, 7.4045, 7.4027, 7.4009, 7.3991, 7.3973, 7.3955, 7.3937, 7.3919, 7.3901, 7.3883, 7.3865, 7.3847, 7.3829, 7.3811, 7.3793, 7.3775, 7.3757, 7.3739, 7.3721, 7.3703, 7.3685, 7.3667, 7.3649, 7.3631, 7.3613, 7.3595, 7.3577, 7.3559, 7.3541, 7.3523, 7.3505, 7.3487, 7.3469, 7.3451, 7.3433, 7.3415, 7.3397, 7.3379, 7.3361, 7.3343, 7.3325, 7.3307, 7.3289, 7.3271, 7.3253, 7.3235, 7.3217, 7.3199, 7.3181, 7.3163, 7.3145, 7.3127, 7.3109, 7.3091, 7.3073, 7.3055, 7.3037, 7.3019, 7.2999, 7.2981, 7.2963, 7.2945, 7.2927, 7.2909, 7.2891, 7.2873, 7.2855, 7.2837, 7.2819, 7.2801, 7.2783, 7.2765, 7.2747, 7.2729, 7.2711, 7.2693, 7.2675, 7.2657, 7.2639, 7.2621, 7.2603, 7.2585, 7.2567, 7.2549, 7.2531, 7.2513, 7.2495, 7.2477, 7.2459, 7.2441, 7.2423, 7.2405, 7.2387, 7.2369, 7.2351, 7.2333, 7.2315, 7.2297, 7.2279, 7.2261, 7.2243, 7.2225, 7.2207, 7.2189, 7.2171, 7.2153, 7.2135, 7.2117, 7.2099, 7.2081, 7.2063, 7.2045, 7.2027, 7.2009, 7.1991, 7.1973, 7.1955, 7.1937, 7.1919, 7.1901, 7.1883, 7.1865, 7.1847, 7.1829, 7.1811, 7.1793, 7.1775, 7.1757, 7.1739, 7.1721, 7.1703, 7.1685, 7.1667, 7.1649, 7.1631, 7.1613, 7.1595, 7.1577, 7.1559, 7.1541, 7.1523, 7.1505, 7.1487, 7.1469, 7.1451, 7.1433, 7.1415, 7.1397, 7.1379, 7.1361, 7.1343, 7.1325, 7.1307, 7.1289, 7.1271, 7.1253, 7.1235, 7.1217, 7.1199, 7.1181, 7.1163, 7.1145, 7.1127, 7.1109, 7.1091, 7.1073, 7.1055, 7.1037, 7.1019, 7.1001, 7.0983, 7.0965, 7.0947, 7.0929, 7.0911, 7.0893, 7.0875, 7.0857, 7.0839, 7.0821, 7.0803, 7.0785, 7.0767, 7.0749, 7.0731, 7.0713, 7.0695, 7.0677, 7.0659, 7.0641, 7.0623, 7.0605, 7.0587, 7.0569, 7.0551, 7.0533, 7.0515, 7.0497, 7.0479, 7.0461, 7.0443, 7.0425, 7.0407, 7.0389, 7.0371, 7.0353, 7.0335, 7.0317, 7.0299, 7.0281, 7.0263, 7.0245, 7.0227, 7.0209, 7.0191, 7.0173, 7.0155, 7.0137, 7.0119, 7.0101, 7.0083, 7.0065, 7.0047, 7.0029, 7.0011, 6.9993, 6.9975, 6.9957, 6.9939, 6.9921, 6.9903, 6.9885, 6.9867, 6.9849, 6.9831, 6.9813, 6.9795, 6.9777, 6.9759, 6.9741, 6.9723, 6.9705, 6.9687, 6.9669, 6.9651, 6.9633, 6.9615, 6.9597, 6.9579, 6.9561, 6.9543, 6.9525, 6.9507, 6.9489, 6.9471, 6.9453, 6.9435, 6.9417, 6.9399, 6.9381, 6.9363, 6.9345, 6.9327, 6.9309, 6.9291, 6.9273, 6.9255, 6.9237, 6.9219, 6.9201, 6.9183, 6.9165, 6.9147, 6.9129, 6.9111, 6.9093, 6.9075, 6.9057, 6.9039, 6.9021, 6.9003, 6.8985, 6.8967, 6.8949, 6.8931, 6.8913, 6.8895, 6.8877, 6.8859, 6.8841, 6.8823, 6.8805, 6.8787, 6.8769, 6.8751, 6.8733, 6.8715, 6.8697, 6.8679, 6.8661, 6.8643, 6.8625, 6.8607, 6.8589, 6.8571, 6.8553, 6.8535, 6.8517, 6.8499, 6.8481, 6.8463, 6.8445, 6.8427, 6.8409, 6.8391, 6.8373, 6.8355, 6.8337, 6.8319, 6.8301, 6.8283, 6.8265, 6.8247, 6.8229, 6.8211, 6.8193, 6.8175, 6.8157, 6.8139, 6.8121, 6.8103, 6.8085, 6.8067, 6.8049, 6.8031, 6.8013, 6.7995, 6.7977, 6.7959, 6.7941, 6.7923, 6.7905, 6.7887, 6.7869, 6.7851, 6.7833, 6.7815, 6.7797, 6.7779, 6.7761, 6.7743, 6.7725, 6.7707, 6.7689, 6.7671, 6.7653, 6.7635, 6.7617, 6.7599, 6.7581, 6.7563,

Chemical structure of compound **5c** is shown in the inset. The structure is a 1,2-dihydro-1-hydroxy-3-(4-phenylbut-1-en-1-yl)-1H-inden-1-one derivative. The chemical structure is displayed within a box, with the label **5c** below it.

SpinWorks 4: BS-09-43

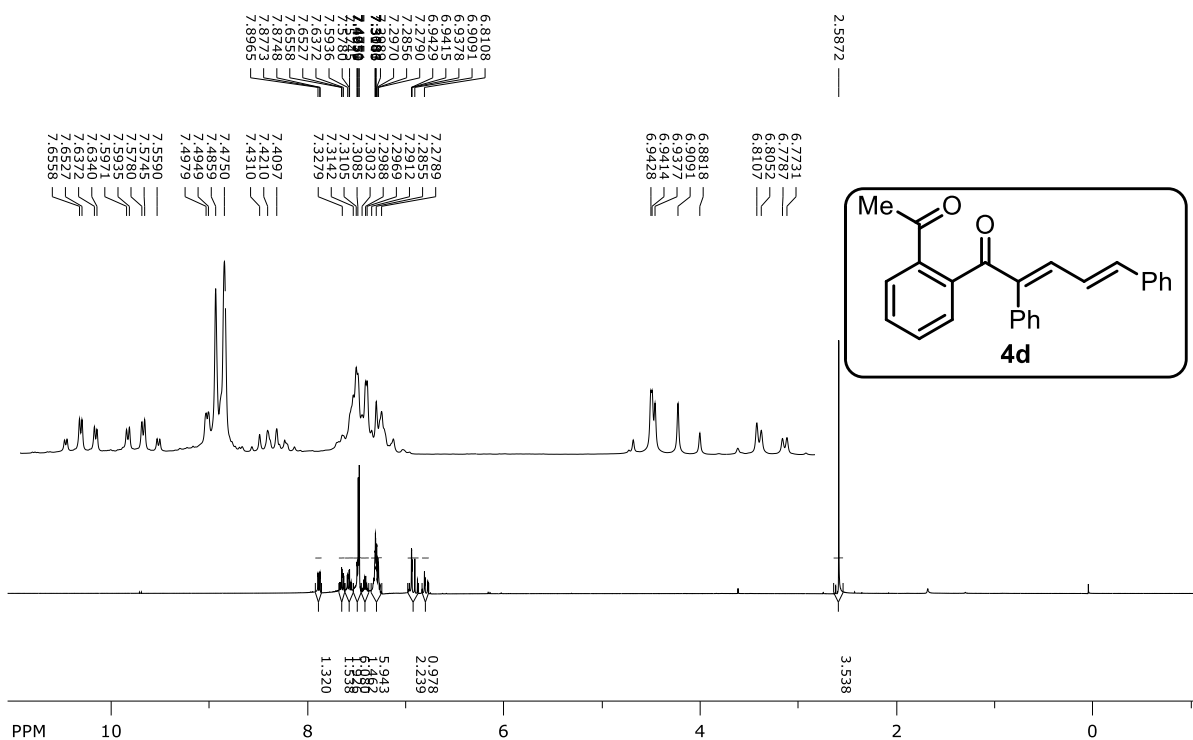

SpinWorks 4: BS 09 43

C13CPD256 CDCl<sub>3</sub> /opt/topspin3.5pl2/nmrdata nmrsu 33

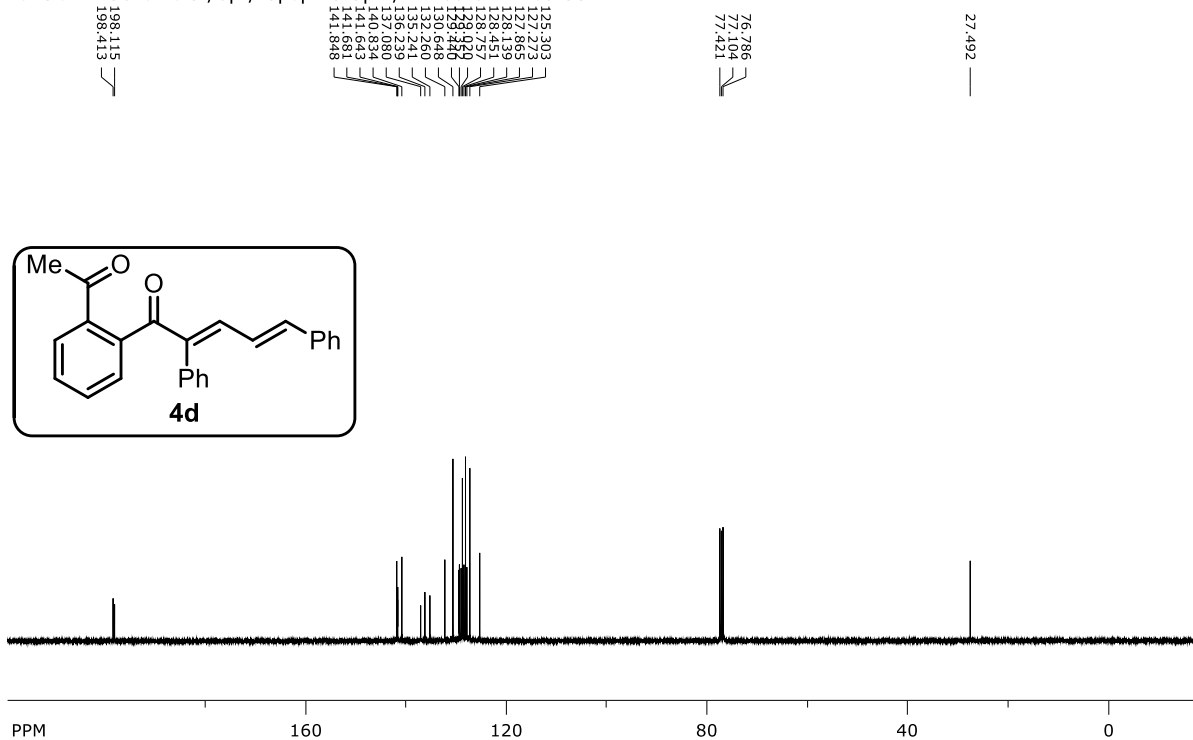

Chemical structure of **5d** is shown in the inset. The structure is a substituted cyclopentenone with a phenyl group and a hydroxyl group on the ring, and a side chain containing two double bonds and a phenyl group.

<sup>1</sup>H NMR spectrum (CDCl<sub>3</sub>) of compound **5d** is displayed below the structure. The spectrum shows peaks in the aromatic region (6.6–7.8 ppm) and the aliphatic region (7.2–7.8 ppm). Integration values are provided below the peaks.

| Chemical Shift (ppm)                                                                                           | Integration |
|----------------------------------------------------------------------------------------------------------------|-------------|
| 7.5134, 7.5028, 7.5326                                                                                         | 1.086       |
| 7.6814, 7.7006, 7.7418, 7.7511                                                                                 | 1.038       |
| 7.2637, 7.2574, 7.2483, 7.2361, 7.2322, 7.2252, 7.2164, 7.2046, 7.2010, 7.1883, 7.1831, 7.1749, 7.1729, 7.1670 | 8.860       |
| 6.4219, 6.4490, 6.4880, 6.4609, 6.6711, 6.6711, 6.8040, 6.8311, 6.8494, 7.1521                                 | 2.893       |
| 6.6321, 6.6712                                                                                                 | 1.002       |
| 6.8040, 6.8311, 6.8494                                                                                         | 1.015       |
| 2.8635, 3.1033, 3.1500                                                                                         | 1.028       |
| 2.5926, 2.8168                                                                                                 | 0.929       |
| 0.0000                                                                                                         | 1.000       |

Chemical structure of **5d** is shown in the inset. The structure is a 2-phenyl-2-((E)-3-phenylprop-2-en-1-yl)-1,3-dihydroisobenzofuran-5(1H)-one. The chemical shift data (PPM) for **5d** is as follows:

| Chemical Shift (PPM)                                                                                                                                                                                                                                                                                                                                                                                                                                                                                                                                                                                                                                                                                                                                                                                                                                                                                                                                                                                                                                                                                                                                                                                                                                                                                                                                                                                                                                                                                                                                                                                                                                                                                                                                                                                                                                                                                                                                                                                                                                                                                                                                                                                                                                                                                                                                                                                                                                                                                                                                                                                                                                                                                                                                                                                                                                                                                                                                                                                                                                                                                                                                                                                                                                                                                                                                                                                                                                                                                                                                                                                                                                                                                                                                                                                                                                                                                                                                                                                                                                                                        |
|---------------------------------------------------------------------------------------------------------------------------------------------------------------------------------------------------------------------------------------------------------------------------------------------------------------------------------------------------------------------------------------------------------------------------------------------------------------------------------------------------------------------------------------------------------------------------------------------------------------------------------------------------------------------------------------------------------------------------------------------------------------------------------------------------------------------------------------------------------------------------------------------------------------------------------------------------------------------------------------------------------------------------------------------------------------------------------------------------------------------------------------------------------------------------------------------------------------------------------------------------------------------------------------------------------------------------------------------------------------------------------------------------------------------------------------------------------------------------------------------------------------------------------------------------------------------------------------------------------------------------------------------------------------------------------------------------------------------------------------------------------------------------------------------------------------------------------------------------------------------------------------------------------------------------------------------------------------------------------------------------------------------------------------------------------------------------------------------------------------------------------------------------------------------------------------------------------------------------------------------------------------------------------------------------------------------------------------------------------------------------------------------------------------------------------------------------------------------------------------------------------------------------------------------------------------------------------------------------------------------------------------------------------------------------------------------------------------------------------------------------------------------------------------------------------------------------------------------------------------------------------------------------------------------------------------------------------------------------------------------------------------------------------------------------------------------------------------------------------------------------------------------------------------------------------------------------------------------------------------------------------------------------------------------------------------------------------------------------------------------------------------------------------------------------------------------------------------------------------------------------------------------------------------------------------------------------------------------------------------------------------------------------------------------------------------------------------------------------------------------------------------------------------------------------------------------------------------------------------------------------------------------------------------------------------------------------------------------------------------------------------------------------------------------------------------------------------------------|
| 160.2, 159.22                                                                                                                                                                                                                                                                                                                                                                                                                                                                                                                                                                                                                                                                                                                                                                                                                                                                                                                                                                                                                                                                                                                                                                                                                                                                                                                                                                                                                                                                                                                                                                                                                                                                                                                                                                                                                                                                                                                                                                                                                                                                                                                                                                                                                                                                                                                                                                                                                                                                                                                                                                                                                                                                                                                                                                                                                                                                                                                                                                                                                                                                                                                                                                                                                                                                                                                                                                                                                                                                                                                                                                                                                                                                                                                                                                                                                                                                                                                                                                                                                                                                               |
| 145.55, 145.98                                                                                                                                                                                                                                                                                                                                                                                                                                                                                                                                                                                                                                                                                                                                                                                                                                                                                                                                                                                                                                                                                                                                                                                                                                                                                                                                                                                                                                                                                                                                                                                                                                                                                                                                                                                                                                                                                                                                                                                                                                                                                                                                                                                                                                                                                                                                                                                                                                                                                                                                                                                                                                                                                                                                                                                                                                                                                                                                                                                                                                                                                                                                                                                                                                                                                                                                                                                                                                                                                                                                                                                                                                                                                                                                                                                                                                                                                                                                                                                                                                                                              |
| 137.10, 136.85, 136.61, 136.44, 136.29, 136.14, 135.90, 135.73, 135.56, 135.37, 135.29, 135.14, 134.90, 134.73, 134.56, 134.39, 134.22, 134.05, 133.88, 133.71, 133.54, 133.37, 133.20, 133.03, 132.86, 132.69, 132.52, 132.35, 132.18, 132.01, 131.84, 131.67, 131.50, 131.33, 131.16, 130.99, 130.82, 130.65, 130.48, 130.31, 130.14, 129.97, 129.80, 129.63, 129.46, 129.29, 129.12, 128.95, 128.78, 128.61, 128.44, 128.27, 128.10, 127.93, 127.76, 127.59, 127.42, 127.25, 127.08, 126.91, 126.74, 126.57, 126.40, 126.23, 126.06, 125.89, 125.72, 125.55, 125.38, 125.21, 125.04, 124.87, 124.70, 124.53, 124.36, 124.19, 124.02, 123.85, 123.68, 123.51, 123.34, 123.17, 123.00, 122.83, 122.66, 122.49, 122.32, 122.15, 121.98, 121.81, 121.64, 121.47, 121.30, 121.13, 120.96, 120.79, 120.62, 120.45, 120.28, 120.11, 119.94, 119.77, 119.60, 119.43, 119.26, 119.09, 118.92, 118.75, 118.58, 118.41, 118.24, 118.07, 117.90, 117.73, 117.56, 117.39, 117.22, 117.05, 116.88, 116.71, 116.54, 116.37, 116.20, 116.03, 115.86, 115.69, 115.52, 115.35, 115.18, 115.01, 114.84, 114.67, 114.50, 114.33, 114.16, 113.99, 113.82, 113.65, 113.48, 113.31, 113.14, 112.97, 112.80, 112.63, 112.46, 112.29, 112.12, 111.95, 111.78, 111.61, 111.44, 111.27, 111.10, 110.93, 110.76, 110.59, 110.42, 110.25, 110.08, 109.91, 109.74, 109.57, 109.40, 109.23, 109.06, 108.89, 108.72, 108.55, 108.38, 108.21, 108.04, 107.87, 107.70, 107.53, 107.36, 107.19, 107.02, 106.85, 106.68, 106.51, 106.34, 106.17, 106.00, 105.83, 105.66, 105.49, 105.32, 105.15, 104.98, 104.81, 104.64, 104.47, 104.30, 104.13, 103.96, 103.79, 103.62, 103.45, 103.28, 103.11, 102.94, 102.77, 102.60, 102.43, 102.26, 102.09, 101.92, 101.75, 101.58, 101.41, 101.24, 101.07, 100.90, 100.73, 100.56, 100.39, 100.22, 100.05, 99.88, 99.71, 99.54, 99.37, 99.20, 99.03, 98.86, 98.69, 98.52, 98.35, 98.18, 98.01, 97.84, 97.67, 97.50, 97.33, 97.16, 96.99, 96.82, 96.65, 96.48, 96.31, 96.14, 95.97, 95.80, 95.63, 95.46, 95.29, 95.12, 94.95, 94.78, 94.61, 94.44, 94.27, 94.10, 93.93, 93.76, 93.59, 93.42, 93.25, 93.08, 92.91, 92.74, 92.57, 92.40, 92.23, 92.06, 91.89, 91.72, 91.55, 91.38, 91.21, 91.04, 90.87, 90.70, 90.53, 90.36, 90.19, 90.02, 89.85, 89.68, 89.51, 89.34, 89.17, 89.00, 88.83, 88.66, 88.49, 88.32, 88.15, 87.98, 87.81, 87.64, 87.47, 87.30, 87.13, 86.96, 86.79, 86.62, 86.45, 86.28, 86.11, 85.94, 85.77, 85.60, 85.43, 85.26, 85.09, 84.92, 84.75, 84.58, 84.41, 84.24, 84.07, 83.90, 83.73, 83.56, 83.39, 83.22, 83.05, 82.88, 82.71, 82.54, 82.37, 82.20, 82.03, 81.86, 81.69, 81.52, 81.35, 81.18, 81.01, 80.84, 80.67, 80.50, 80.33, 80.16, 79.99, 79.82, 79.65, 79.48, 79.31, 79.14, 78.97, 78.80, 78.63, 78.46, 78.29, 78.12, 77.95, 77.78, 77.61, 77.44, 77.27, 77.10, 76.93, 76.76, 76.59, 76.42, 76.25, 76.08, 75.91, 75.74, 75.57, 75.40, 75.23, 75.06, 74.89, 74.72, 74.55, 74.38, 74.21, 74.04, 73.87, 73.70, 73.53, 73.36, 73.19, 73.02, 72.85, 72.68, 72.51, 72.34, 72.17, 72.00, 71.83, 71.66, 71.49, 71.32, 71.15, 70.98, 70.81, 70.64, 70.47, 70.30, 70.13, 69.96, 69.79, 69.62, 69.45, 69.28, 69.11, 68.94, 68.77, 68.60, 68.43, 68.26, 68.09, 67.92, 67.75, 67.58, 67.41, 67.24, 67.07, 66.90, 66.73, 66.56, 66.39, 66.22, 66.05, 65.88, 65.71, 65.54, 65.37, 65.20, 65.03, 64.86, 64.69, 64.52, 64.35, 64.18, 64.01, 63.84, 63.67, 63.50, 63.33, 63.16, 62.99, 62.82, 62.65, 62.48, 62.31, 62.14, 61.97, 61.80, 61.63, 61.46, 61.29, 61.12, 60.95, 60.78, 60.61, 60.44, 60.27, 60.10, 59.93, 59.76, 59.59, 59.42, 59.25, 59.08, 58.91, 58.74, 58.57, 58.40, 58.23, 58.06, 57.89, 57.72, 57.55, 57.38, 57.21, 57.04, 56.87, 56.70, 56.53, 56.36, 56.19, 56.02, 55.85, 55.68, 55.51, 55.34, 55.17, 55.00, 54.83, 54.66, 54.49, 54.32, 54.15, 53.98, 53.81, 53.64, 53.47, 53.30, 53.13, 52.96, 52.79, 52.62, 52.45, 52.28, 52.11, 51.94, 51.77, 51.60, 51.43, 51.26, 51.09, 50.92, 50.75, 50.58, 50.41, 50.24, 50.07, 49.90, 49.73, 49.56, 49.39, 49.22, 49.05, 48.88, 48.71, 48.54, 48.37, 48.20, 48.03, 47.86, 47.69, 47.52, 47.35, 47.18, 47.01, 46. |

SpinWorks 4: BS 08 51  
 PROTON CDCl3 /opt/topspin3.5pl2/nmrdata nmrsu 28

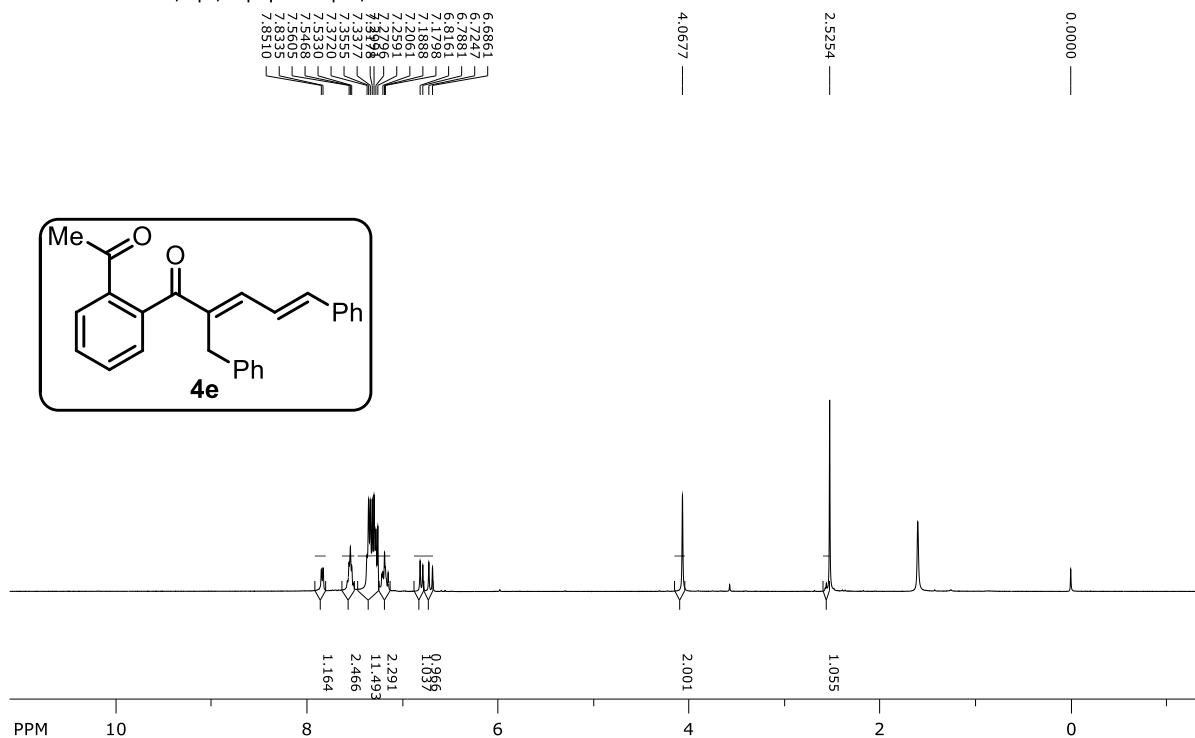

SpinWorks 4: BS 08 51  
 C13CPD256 CDCl3 /opt/topspin3.5pl2/nmrdata nmrsu 28

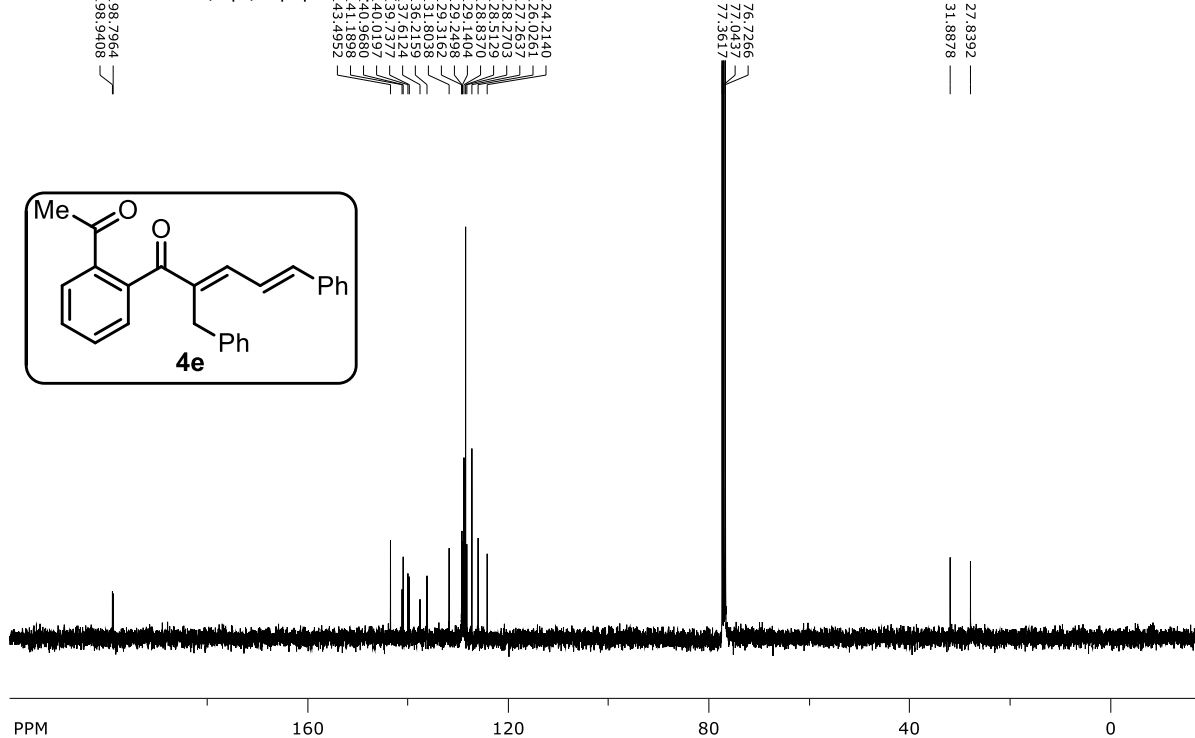

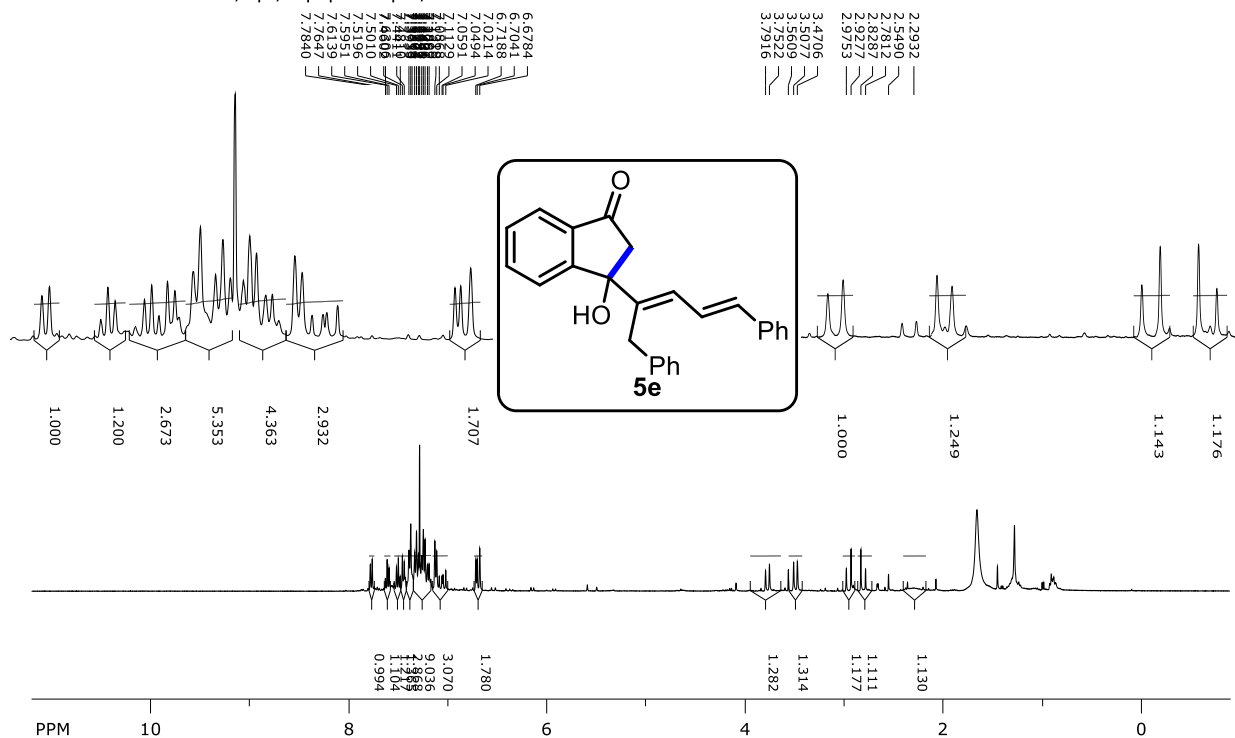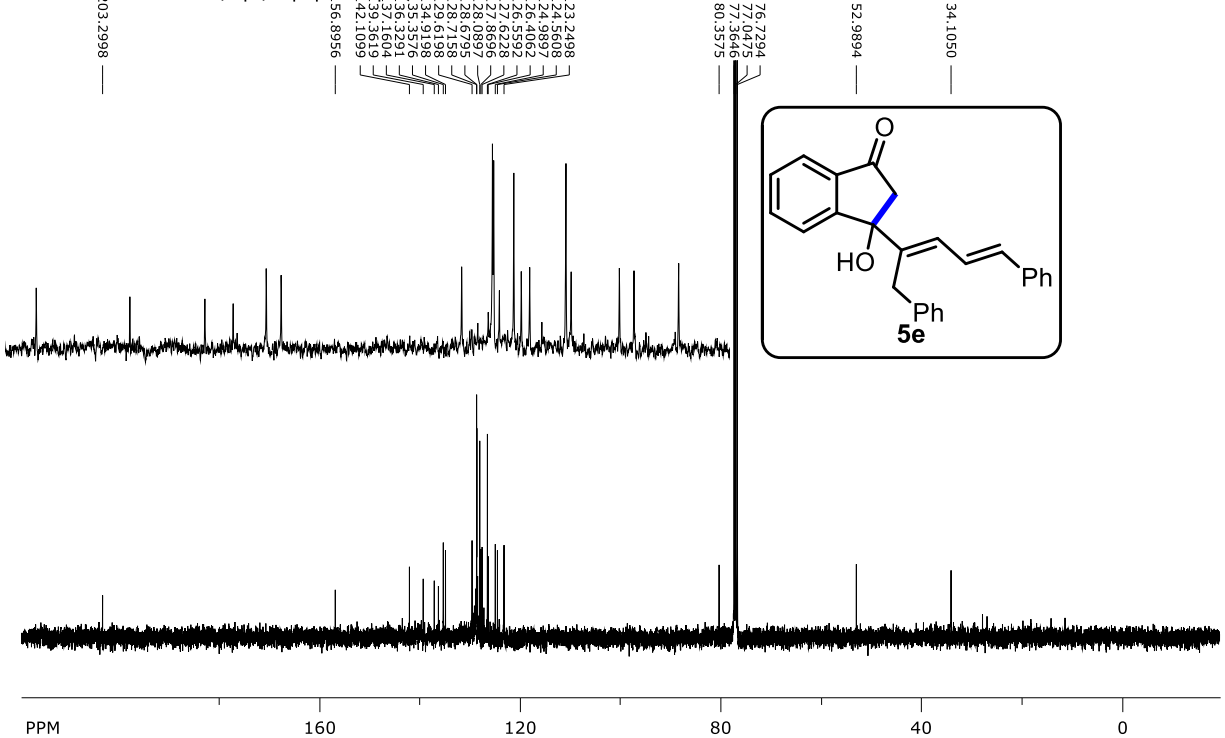

Chemical structure of compound **4f** is shown in the inset. The structure is a naphthalene derivative with a methyl ketone group and a side chain containing a trans-double bond and a phenyl group.

<sup>1</sup>H NMR spectrum (CDCl<sub>3</sub>) of compound **4f** is displayed below the structure. The spectrum shows peaks corresponding to the protons in the molecule, with integration values provided for several signals.

Chemical structure of **4f**: CC(=O)c1ccc2ccccc2c1C(=O)C=C/C=C/c3ccccc3

<sup>1</sup>H NMR spectrum (CDCl<sub>3</sub>) of compound **4f**:

| Chemical Shift (ppm) | Integration |
|----------------------|-------------|
| 7.9191               | 0.790       |
| 7.9420               | 0.565       |
| 7.9639               | 0.920       |
| 7.9837               | 0.461       |
| 8.0124               | 2.620       |
| 7.5219               | 0.790       |
| 7.5234               | 0.565       |
| 7.5463               | 0.920       |
| 7.5946               | 0.461       |
| 7.5976               | 2.620       |
| 7.6150               | 0.790       |
| 7.6180               | 0.565       |
| 7.6440               | 0.920       |
| 7.6611               | 0.461       |
| 7.7627               | 2.620       |
| 7.8181               | 0.790       |
| 7.8412               | 0.565       |
| 7.8649               | 0.920       |
| 7.8881               | 0.461       |
| 7.9191               | 0.790       |
| 7.9420               | 0.565       |
| 7.9639               | 0.920       |
| 7.9837               | 0.461       |
| 8.0124               | 2.620       |
| 6.4563               | 1.974       |
| 6.4826               | 0.790       |
| 6.4951               | 0.565       |
| 2.3367               | 3.004       |
| 2.6568               | 3.128       |

Chemical structure of **4f** is shown in the inset. The <sup>13</sup>C NMR spectrum (CDCl<sub>3</sub>) shows peaks at 12.0247, 28.0895, 76.7348, 77.0518, 77.3699, 120.9423, 121.0535, 121.1644, 121.2770, 121.3888, 121.4997, 121.6106, 121.7215, 121.8324, 121.9433, 122.0542, 122.1651, 122.2760, 122.3869, 122.4978, 122.6087, 122.7196, 122.8305, 122.9414, 123.0523, 123.1632, 123.2741, 123.3850, 123.4959, 123.6068, 123.7177, 123.8286, 123.9395, 124.0504, 124.1613, 124.2722, 124.3831, 124.4940, 124.6049, 124.7158, 124.8267, 124.9376, 125.0485, 125.1594, 125.2703, 125.3812, 125.4921, 125.6030, 125.7139, 125.8248, 125.9357, 126.0466, 126.1575, 126.2684, 126.3793, 126.4902, 126.6011, 126.7120, 126.8229, 126.9338, 127.0447, 127.1556, 127.2665, 127.3774, 127.4883, 127.5992, 127.7101, 127.8210, 127.9319, 128.0428, 128.1537, 128.2646, 128.3755, 128.4864, 128.5973, 128.7082, 128.8191, 128.9300, 129.0409, 129.1518, 129.2627, 129.3736, 129.4845, 129.5954, 129.7063, 129.8172, 129.9281, 130.0390, 130.1499, 130.2608, 130.3717, 130.4826, 130.5935, 130.7044, 130.8153, 130.9262, 131.0371, 131.1480, 131.2589, 131.3698, 131.4807, 131.5916, 131.7025, 131.8134, 131.9243, 132.0352, 132.1461, 132.2570, 132.3679, 132.4788, 132.5897, 132.7006, 132.8115, 132.9224, 133.0333, 133.1442, 133.2551, 133.3660, 133.4769, 133.5878, 133.6987, 133.8096, 133.9205, 134.0314, 134.1423, 134.2532, 134.3641, 134.4750, 134.5859, 134.6968, 134.8077, 134.9186, 135.0295, 135.1404, 135.2513, 135.3622, 135.4731, 135.5840, 135.6949, 135.8058, 135.9167, 136.0276, 136.1385, 136.2494, 136.3603, 136.4712, 136.5821, 136.6930, 136.8039, 136.9148, 137.0257, 137.1366, 137.2475, 137.3584, 137.4693, 137.5802, 137.6911, 137.8020, 137.9129, 138.0238, 138.1347, 138.2456, 138.3565, 138.4674, 138.5783, 138.6892, 138.8001, 138.9110, 139.0219, 139.1328, 139.2437, 139.3546, 139.4655, 139.5764, 139.6873, 139.7982, 139.9091, 140.0200, 140.1309, 140.2418, 140.3527, 140.4636, 140.5745, 140.6854, 140.7963, 140.9072, 141.0181, 141.1290, 141.2399, 141.3508, 141.4617, 141.5726, 141.6835, 141.7944, 141.9053, 142.0162, 142.1271, 142.2380, 142.3489, 142.4598, 142.5707, 142.6816, 142.7925, 142.9034, 143.0143, 143.1252, 143.2361, 143.3470, 143.4579, 143.5688, 143.6797, 143.7906, 143.9015, 144.0124, 144.1233, 144.2342, 144.3451, 144.4560, 144.5669, 144.6778, 144.7887, 144.8996, 145.0105, 145.1214, 145.2323, 145.3432, 145.4541, 145.5650, 145.6759, 145.7868, 145.8977, 146.0086, 146.1195, 146.2304, 146.3413, 146.4522, 146.5631, 146.6740, 146.7849, 146.8958, 147.0067, 147.1176, 147.2285, 147.3394, 147.4503, 147.5612, 147.6721, 147.7830, 147.8939, 148.0048, 148.1157, 148.2266, 148.3375, 148.4484, 148.5593, 148.6702, 148.7811, 148.8920, 149.0029, 149.1138, 149.2247, 149.3356, 149.4465, 149.5574, 149.6683, 149.7792, 149.8901, 150.0010, 150.1119, 150.2228, 150.3337, 150.4446, 150.5555, 150.6664, 150.7773, 150.8882, 151.0000, 151.1109, 151.2218, 151.3327, 151.4436, 151.5545, 151.6654, 151.7763, 151.8872, 152.0000, 152.1109, 152.2218, 152.3327, 152.4436, 152.5545, 152.6654, 152.7763, 152.8872, 153.0000, 153.1109, 153.2218, 153.3327, 153.4436, 153.5545, 153.6654, 153.7763, 153.8872, 154.0000, 154.1109, 154.2218, 154.3327, 154.4436, 154.5545, 154.6654, 154.7763, 154.8872, 155.0000, 155.1109, 155.2218, 155.3327, 155.4436, 155.5545, 155.6654, 155.7763, 155.8872, 156.0000, 156.1109, 156.2218, 156.3327, 156.4436, 156.5545, 156.6654, 156.7763, 156.8872, 157.0000, 157.1109, 157.2218, 157.3327, 157.4436, 157.5545, 157.6654, 157.7763, 157.8872, 158.0000, 158.1109, 158.2218, 158.3327, 158.4436, 158.5545, 158.6654, 158.7763, 158.8872, 159.0000, 159.1109, 159.2218, 159.3327, 159.4436, 159.5545, 159.6654, 159.7763, 159.8872, 160.0000, 160.1109, 160.2218, 160.3327, 160.4436, 160.5545, 160.6654, 160.7763, 160.8872, 161.0000, 161.1109, 161.2218, 161.3327, 161.4436, 161.5545, 161.6654, 161.7763, 161.8872, 162.0000, 162.1109, 162.2218, 162.3327, 162.4436, 162.5545, 162.6654, 162.7763, 162.8872, 163.0000, 163.1109, 163.2218, 163.3327, 163.4436, 163.5545, 163.6654, 163.7763, 163.8872, 164.0000, 164.1109, 164.2218, 164.3327, 164.4436, 164.5545, 164.6654, 164.7763, 164.8872, 165.0000, 165.1109, 165.2218, 165.3



SpinWorks 4: BS-08-271-Re

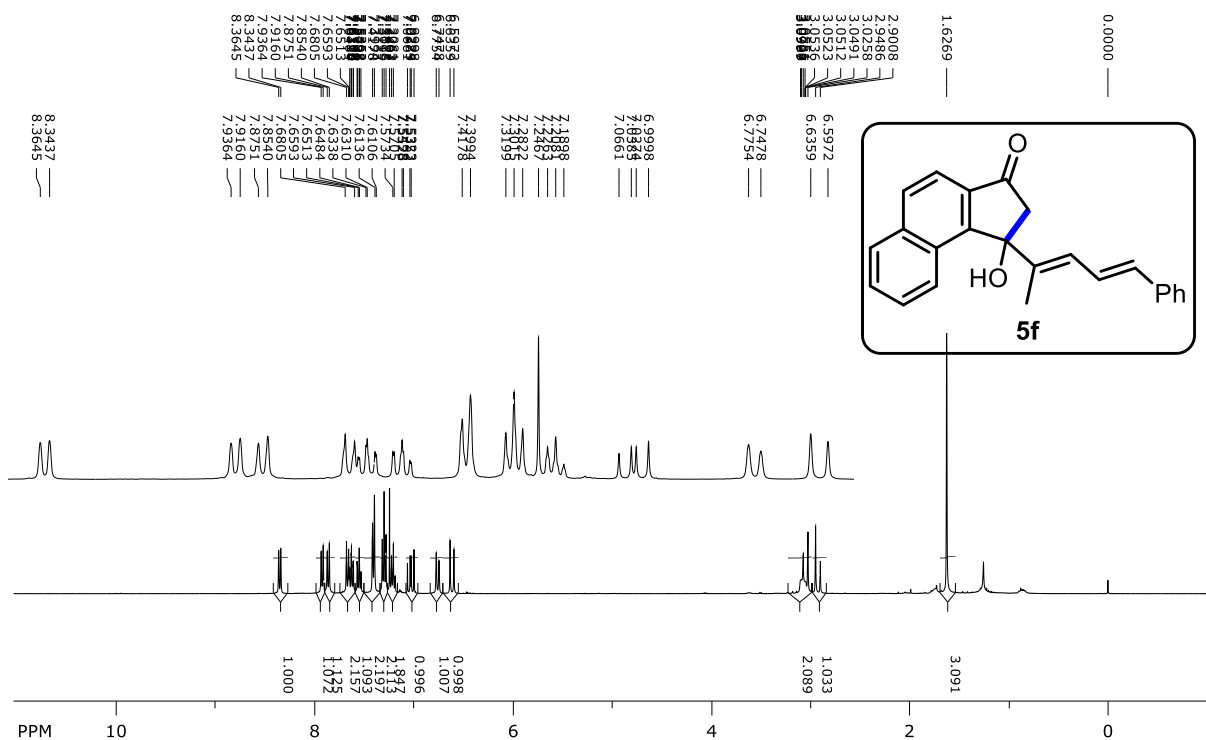

SpinWorks 4: BS 08 271  
C13CPD256 CDCl3 /opt/topspin3.5pl2/nmrdata/nmr su 23

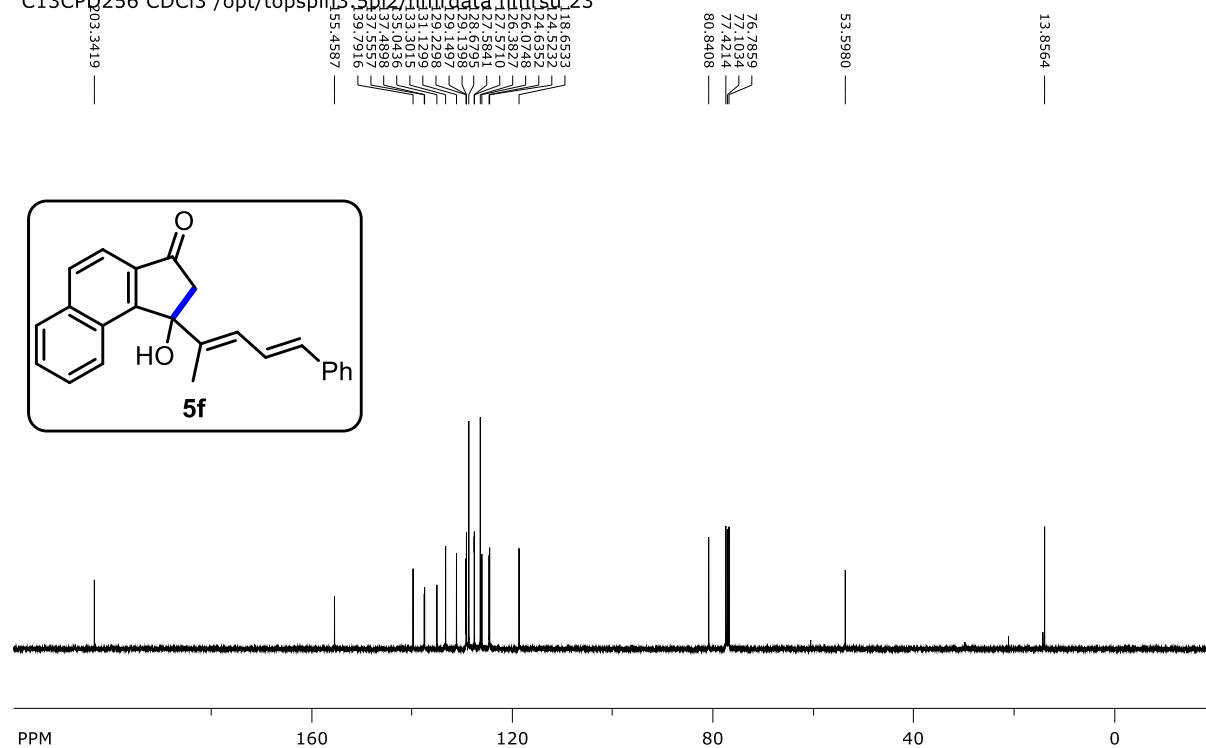

[illegible]

150.000 MHz, CDCl<sub>3</sub>, 70 °C, top

Chemical structure of **5g** is shown in the inset:

CC(=O)C1=CC=C(C=C1)C(=O)C2=CC=C(C=C2)C=C/C=C/C3=CC=CC=C3

**5g**

<sup>13</sup>C NMR spectrum (CDCl<sub>3</sub>, 70 °C) showing peaks at (ppm): 155.1934, 149.5357, 141.5990, 134.9332, 134.3027, 132.4052, 132.1935, 131.9802, 130.3353, 130.2833, 129.4209, 129.3820, 129.3513, 129.3013, 129.1033, 76.2278, 76.0459, 75.9628, 55.7078, 28.2482, 12.4627.

SpinWorks 4: BS-09-35

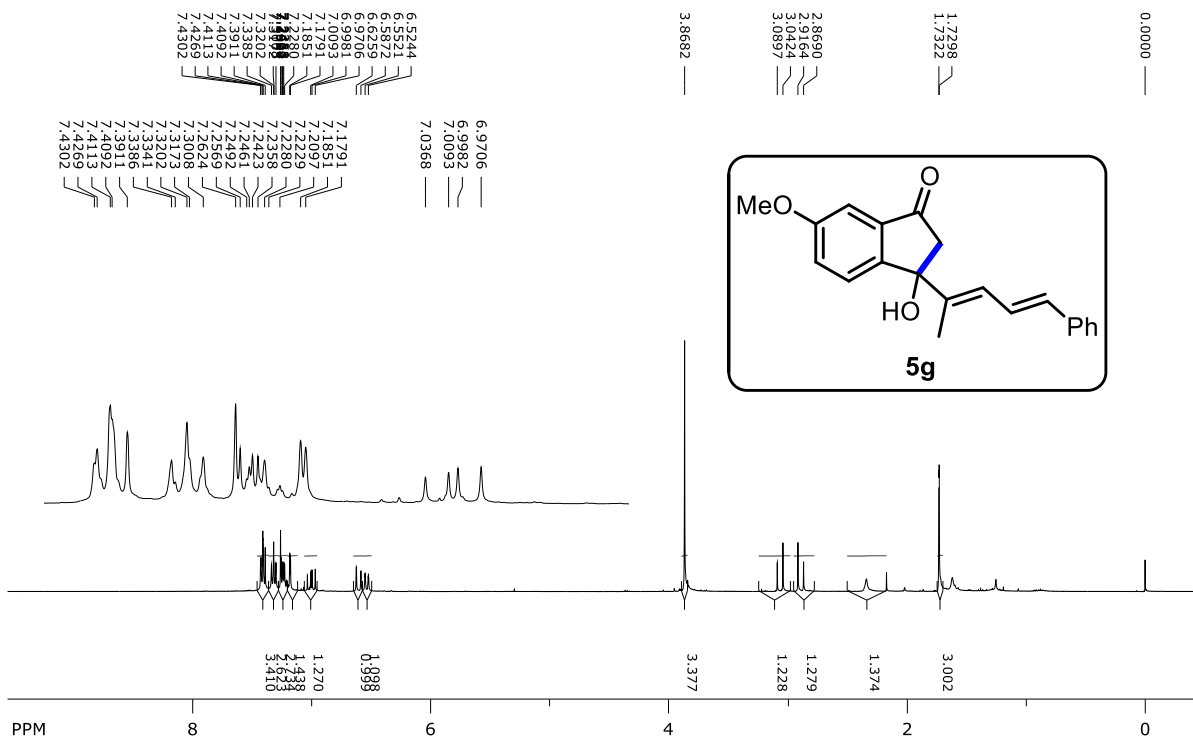

SpinWorks 4: BS 09 35

C13CPD256 CDCl3 /opt/topspin3.5pl2/nmrdata/nmr55

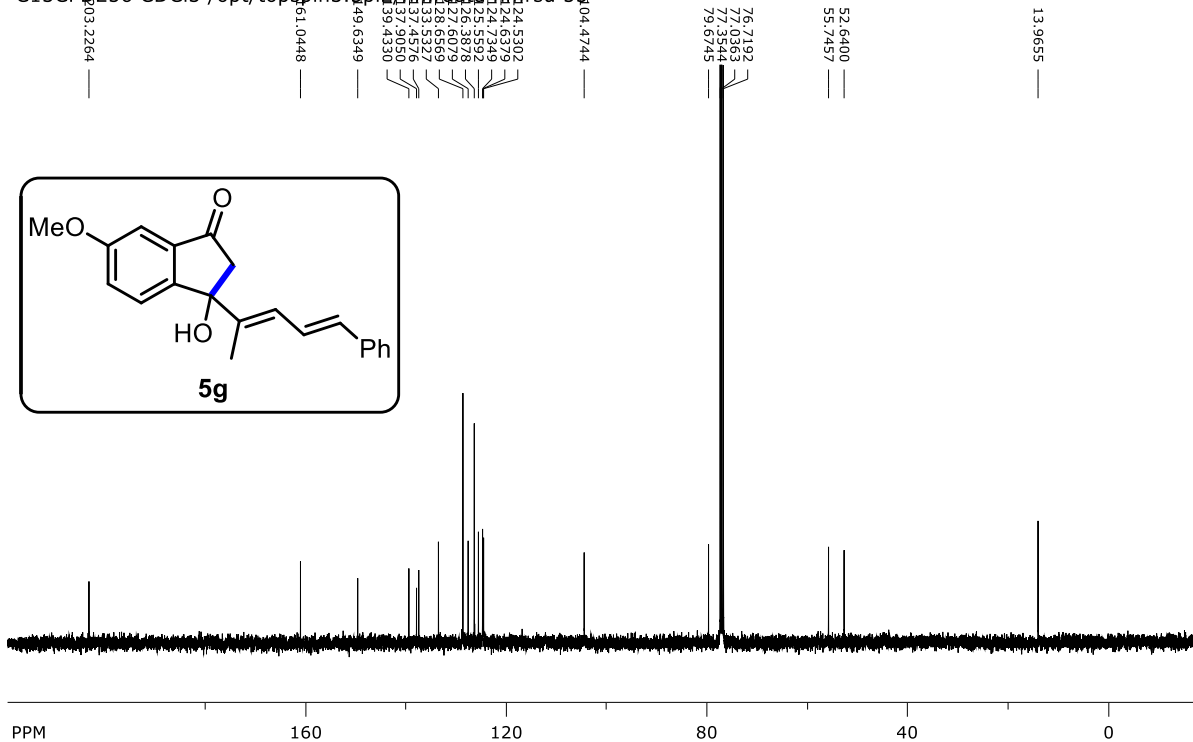

SpinWorks 4: BS-08-98

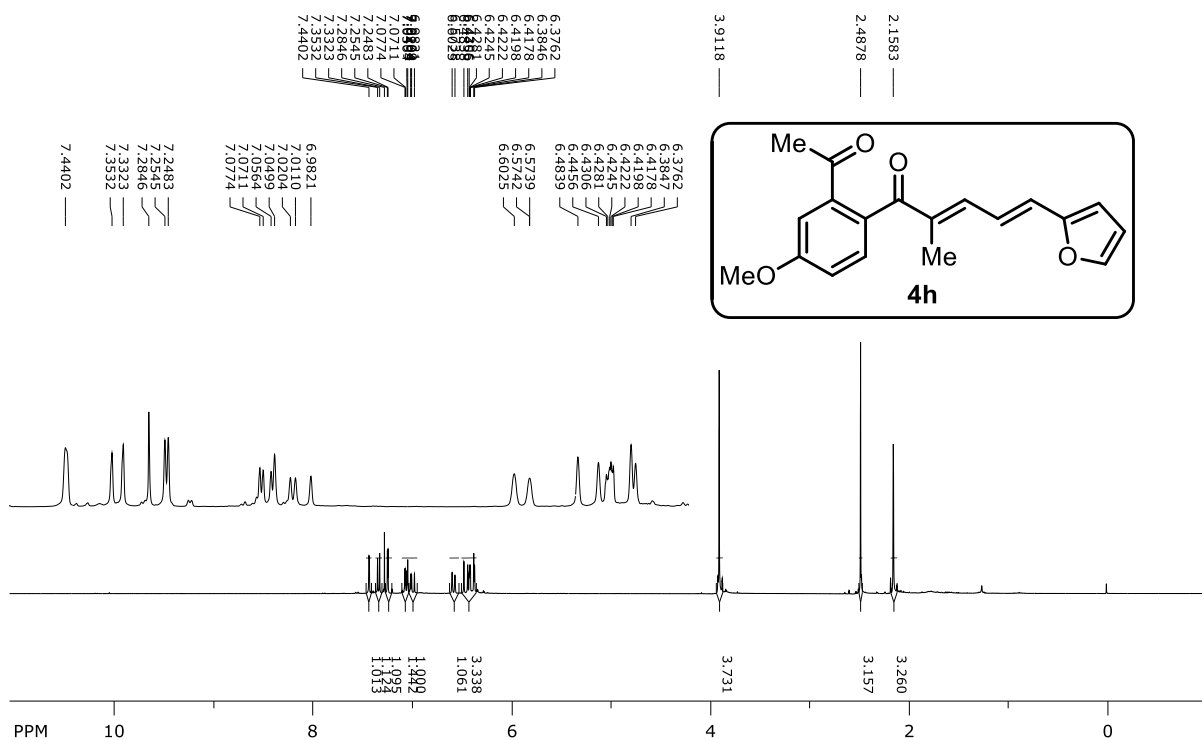

SpinWorks 4: BS 08 98

C13CPD256 CDCl<sub>3</sub> /opt/topspin3.5pl2/nmrdata/nmrspu\_33

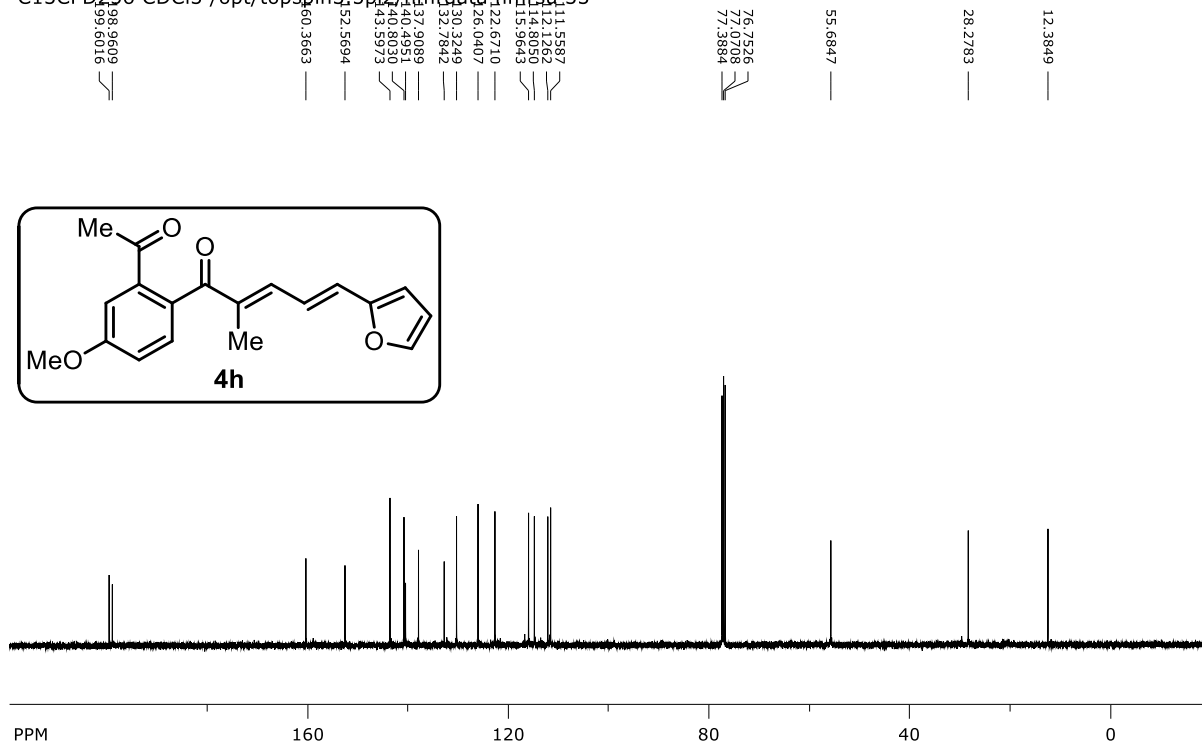



SpinWorks 4: BS-08-22

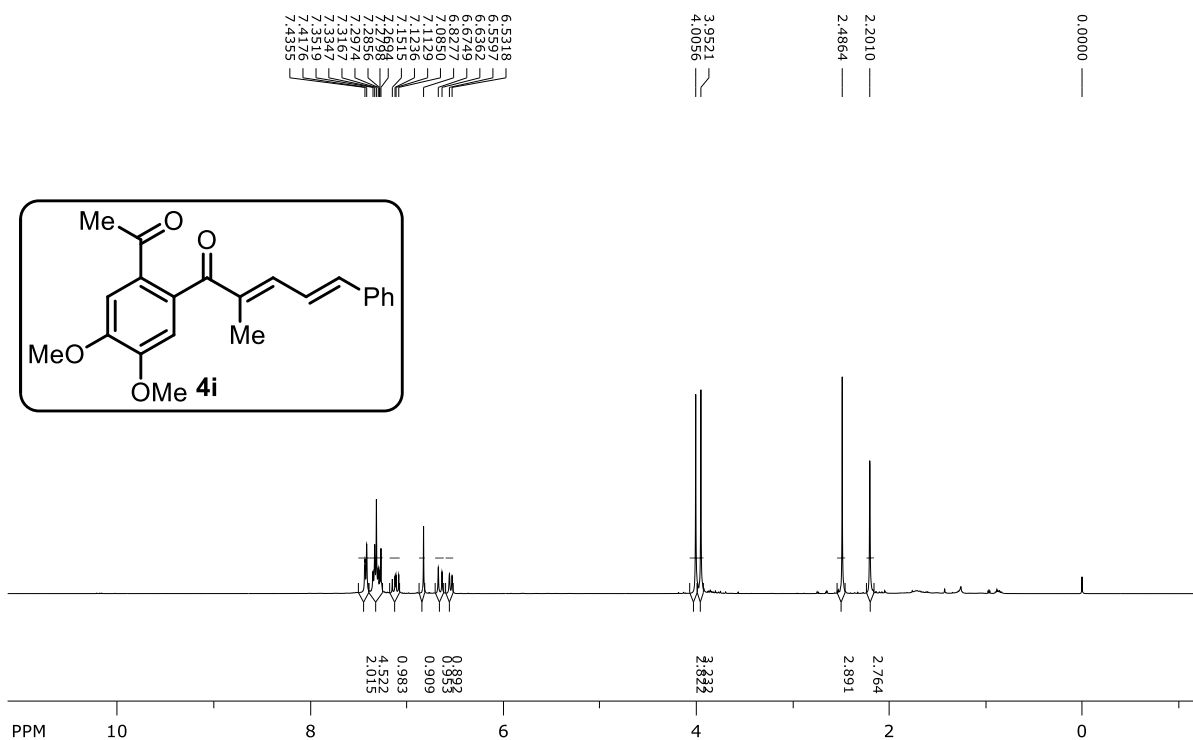

SpinWorks 4: BS 08 22

C13CPD256 CDCl<sub>3</sub> /opt/topspin3.5pl2/nmrdata nmrsu 37

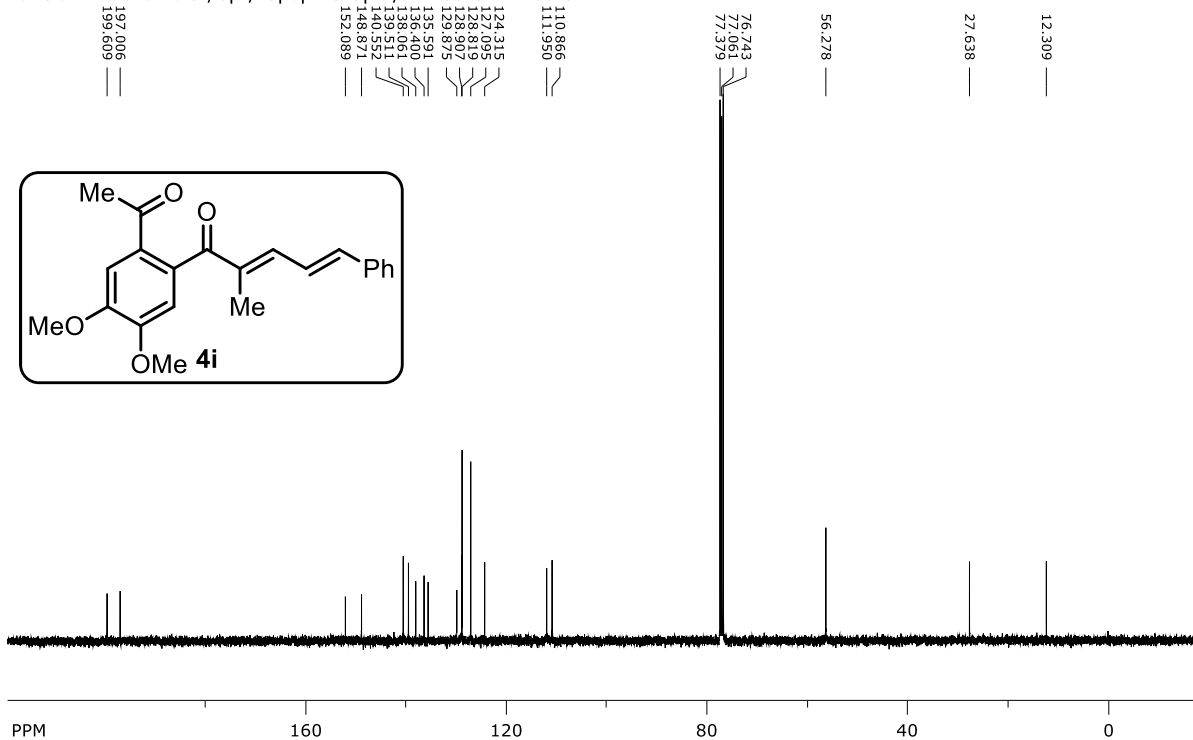

SpinWorks 4: BS-08-30-1

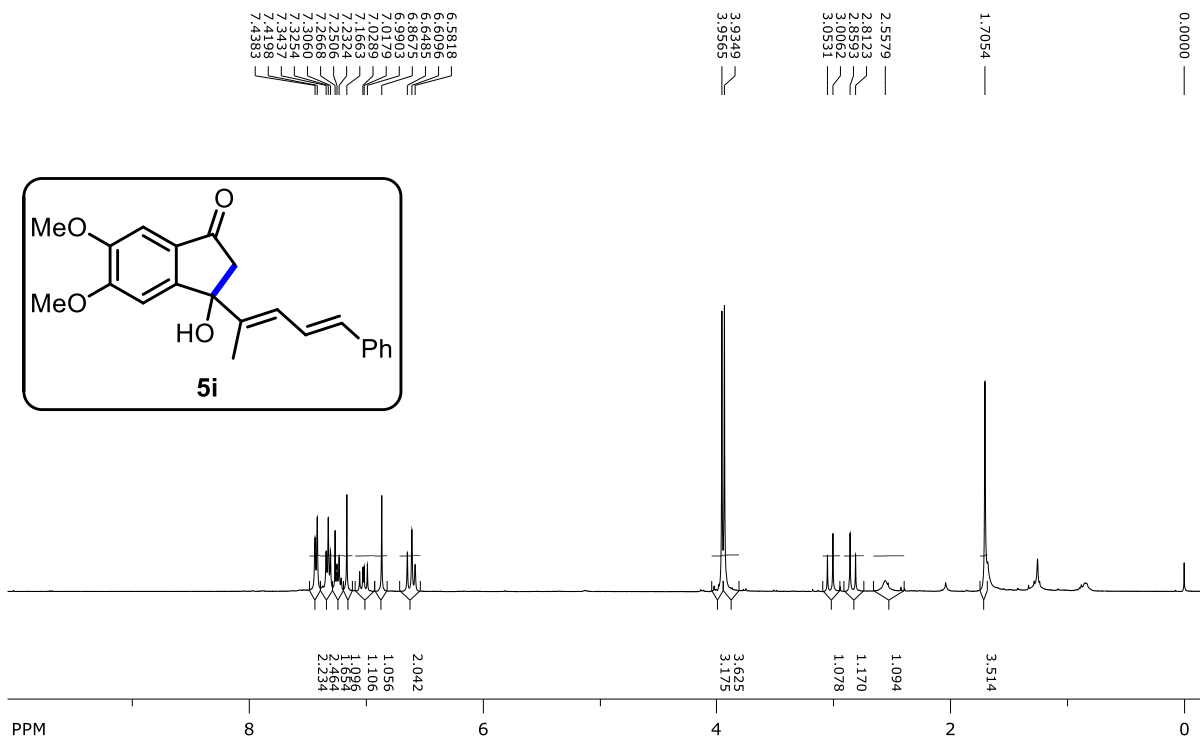

SpinWorks 4: BS 08 30 1

C13CPD256 CDCl3 /opt/topspin3.5/pl2/nmrdata/nmr su 11

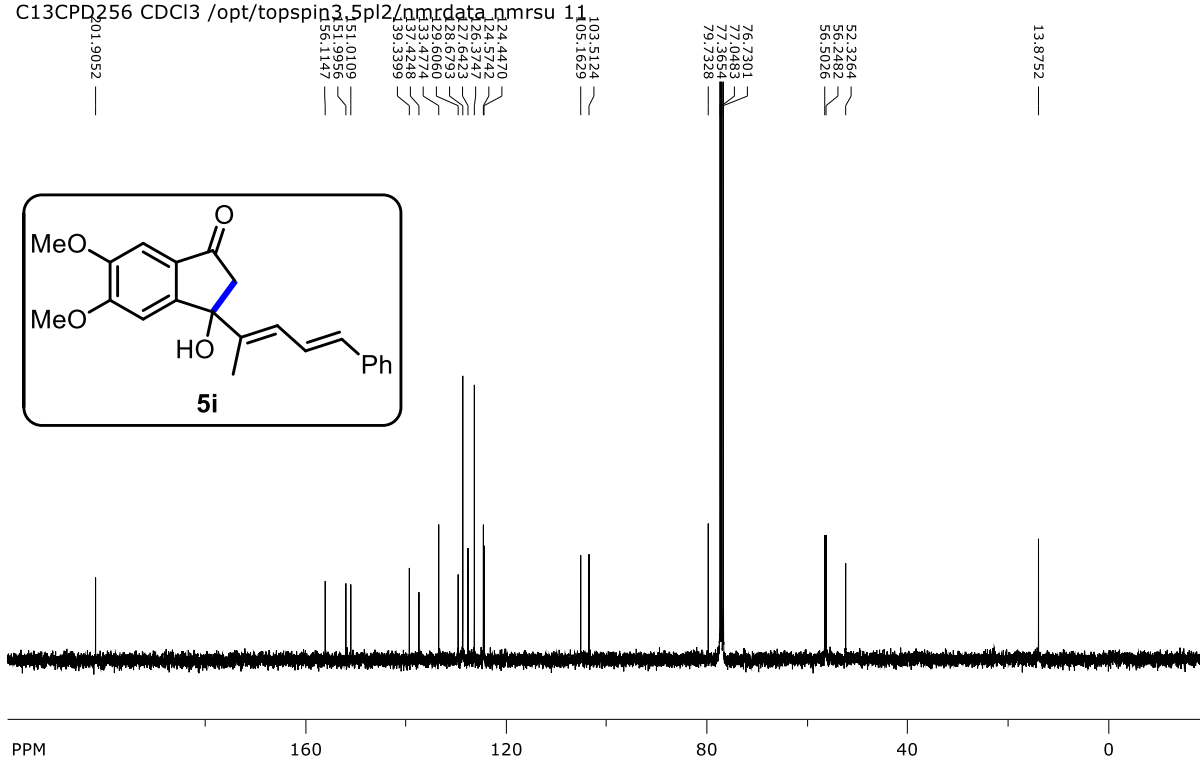

**Chemical structure of 4j:** CC(=O)C1=CC=CC=C1C(=O)C2=CC=CC=C2C(=O)C3=CC=CC=C3

**<sup>1</sup>H NMR spectrum (CDCl<sub>3</sub>):**

- Chemical shift (ppm): 0.0001, 2.2234, 2.2258, 2.5612, 6.7003, 6.7397, 6.7720, 7.1532, 7.1810, 7.1819, 7.1829, 7.2651, 7.2930, 7.3072, 7.3105, 7.3244, 7.3432, 7.3603, 7.4329, 7.4504, 7.4539, 7.4829, 7.5044, 7.5166, 7.4847, 7.4968, 7.5046, 7.5056, 7.5066, 8.1341, 8.1379, 8.1540, 8.1578, 8.7640, 8.7659, 8.7679, 8.7800, 8.1339, 8.1378, 8.1538, 8.1576.
- Integration values: 1.917, 1.052, 3.393, 6.800, 0.982, 0.995, 2.317, 2.947.

[illegible]



SpinWorks 4: bs-08-331

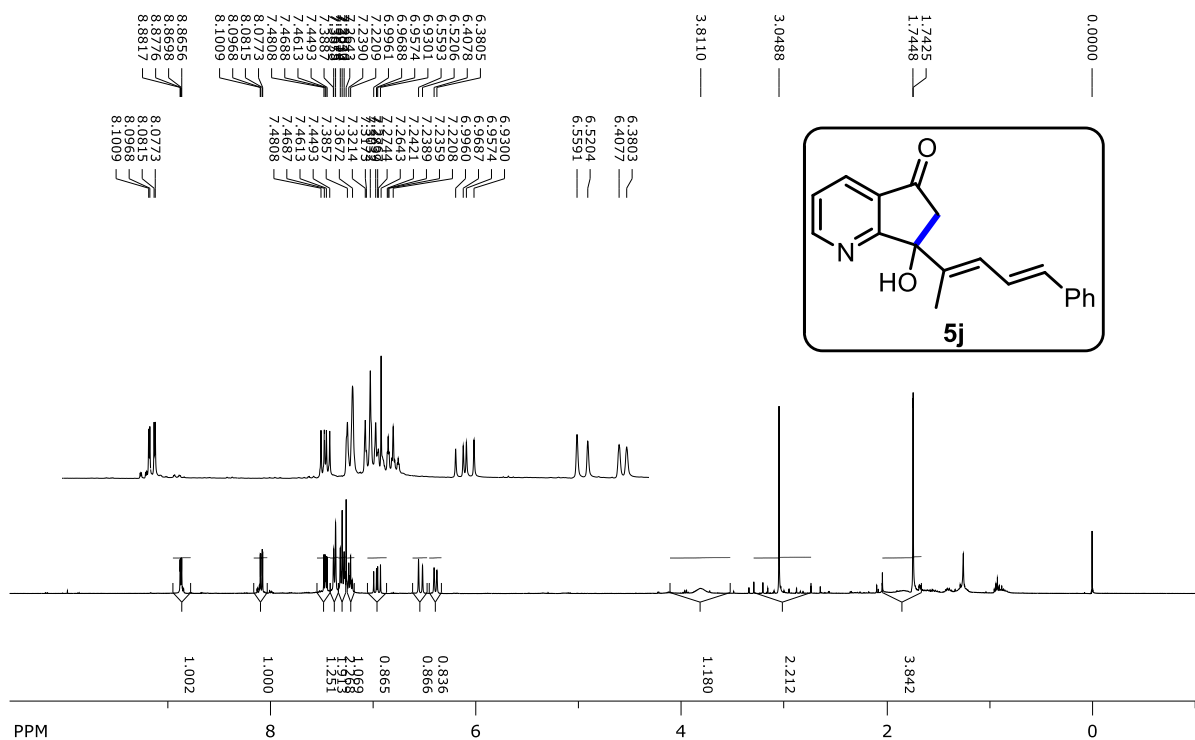

SpinWorks 4: BS 08 331  
C13CPD256 CDCl3 /opt/topspin3.5pl2/nmrdata/nmrsu 49

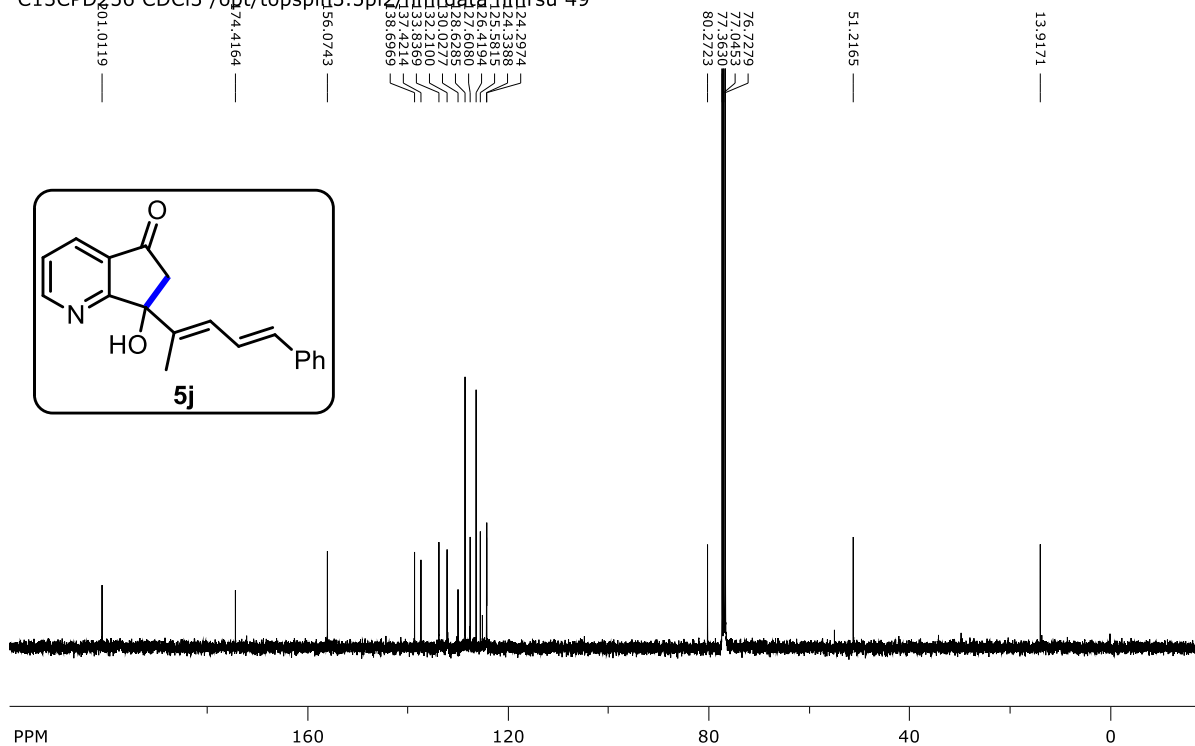

SpinWorks 4: BS-08-70

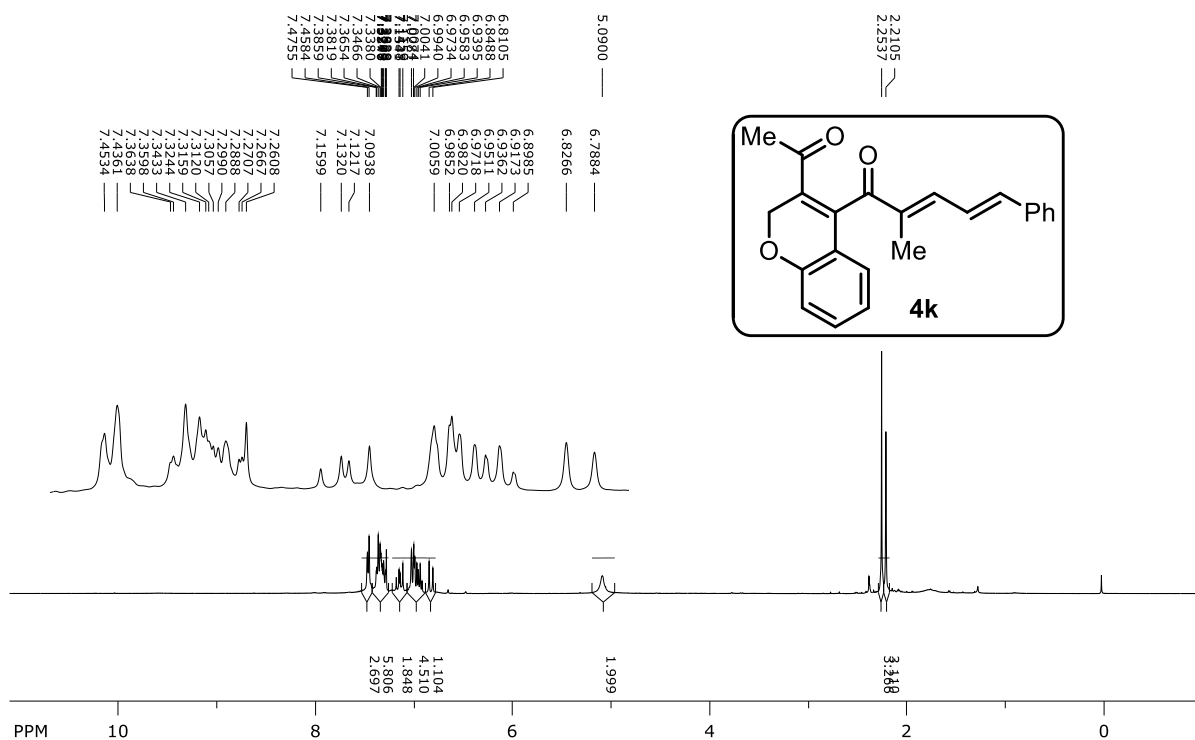

SpinWorks 4: BS 08 70  
C13CPD256.CDCI3 /opt/topspin3.5/pl2/bmrdata.pmr su 44

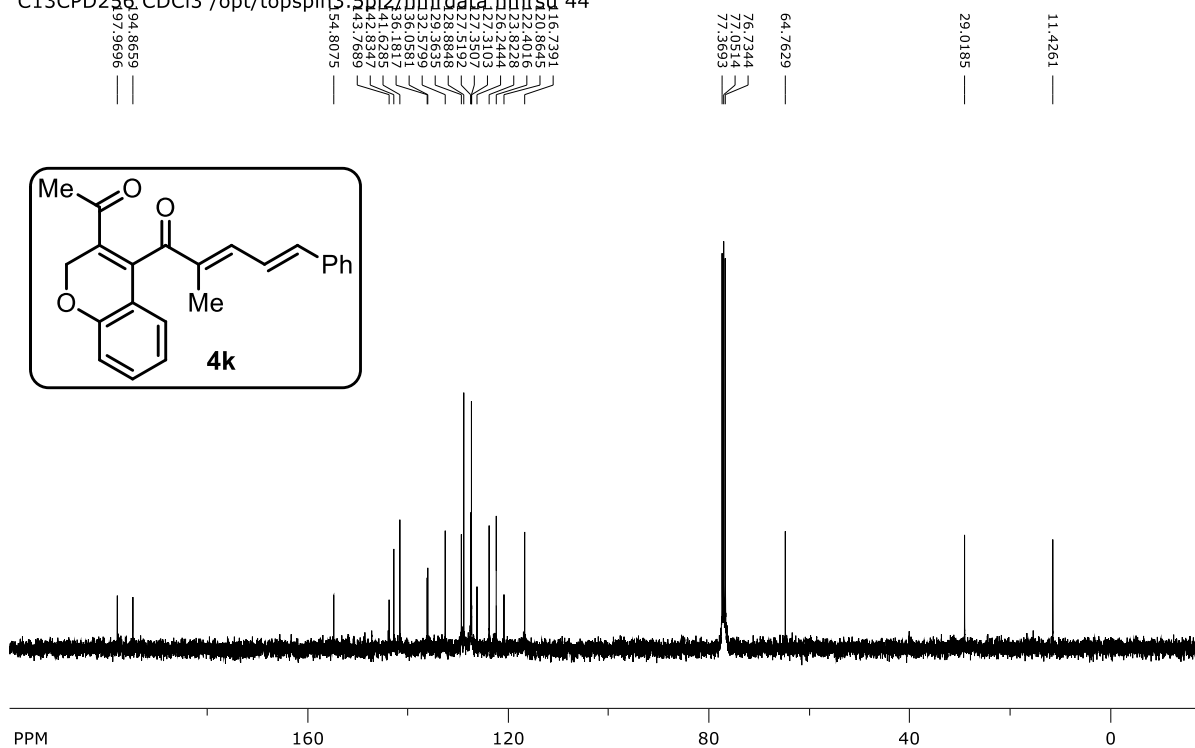

Chemical structure of compound **5k** is shown, which is a substituted benzofuran derivative. The structure features a benzofuran core with a 2-hydroxy-2-(3-phenylallyl)-5-oxo-2,3-dihydro-4H-benzofuran-4-ylidene group. The chemical structure is displayed within a box.

The <sup>1</sup>H NMR spectrum (CDCl<sub>3</sub>) of compound **5k** is shown below the structure. The spectrum displays peaks corresponding to the protons in the molecule, with chemical shifts (ppm) and integration values provided for each peak.

Chemical shift (ppm): 0.0001, 1.7803, 2.6673, 2.7181, 2.8196, 3.0856, 5.0426, 5.0473, 6.6177, 6.6563, 6.6835, 6.6872, 6.9039, 6.9889, 7.0094, 7.0204, 7.0480, 7.1503, 7.1580, 7.2702, 7.2739, 7.2939, 7.3126, 7.3136, 7.4150, 7.4310, 7.5103, 7.5280, 7.2219, 7.2701, 7.2938, 7.3134, 7.3320, 7.4119, 7.4309, 7.5101, 7.5279.

Integration values: 2.037, 2.030, 2.043, 1.84, 4.675, 2.100, 1.116, 1.073, 1.054, 1.000, 3.141.

<sup>13</sup>C NMR spectrum (CDCl<sub>3</sub>) of compound **5k**. The chemical structure of **5k** is shown in the inset. The spectrum displays peaks corresponding to the structure, with the following chemical shifts (ppm) listed above the peaks: 13.4626, 52.1794, 62.7876, 76.7660, 77.0840, 77.4014, 80.4576, 15.9926, 17.8006, 21.9072, 22.4059, 24.9118, 26.4326, 26.4938, 27.7101, 28.6999, 31.5070, 33.3150, 33.3150, 33.3150, 37.6977, 56.2578, 62.1164, 62.1317, 80.0671, 80.0873.

Chemical structure of compound **4l** is shown in the inset. The structure is a benzothiophene derivative with a methyl ketone group, a methyl group, and a trans-alkene chain ending in a phenyl group.

<sup>1</sup>H NMR spectrum (CDCl<sub>3</sub>) of compound **4l** is displayed below the structure. The spectrum shows peaks in the aromatic region (6.8-7.9 ppm) and aliphatic region (1.6-2.5 ppm). Integration values are provided below the peaks.

| Chemical Shift (ppm)                           | Integration |
|------------------------------------------------|-------------|
| 7.8612, 7.8828, 7.8843                         | 1.000       |
| 7.5157, 7.5845, 7.5910, 7.5951, 7.5959         | 1.040       |
| 7.4628, 7.4697, 7.4799, 7.4857, 7.4960         | 4.593       |
| 7.3346, 7.3401, 7.3523, 7.3593                 | 2.263       |
| 7.1497, 7.1833, 7.1881, 7.2308, 7.3346, 7.3401 | 0.973       |
| 6.8309, 6.8648                                 | 0.263       |
| 2.4778                                         | 3.335       |
| 2.2161                                         | 3.407       |
| 1.6127                                         | 3.335       |
| 0.0000                                         | 3.335       |

CC(=O)c1c(C(=O)C(C)=C/C=C/C2=CC=CC=C2)c3ccccc3s1  
**4l**

13C NMR (CDCl<sub>3</sub>) δ: 136.8, 136.7, 135.3, 135.2, 134.3, 133.2, 132.4, 132.3, 132.2, 132.1, 131.9, 131.8, 131.7, 131.6, 131.5, 131.4, 131.3, 131.2, 131.1, 131.0, 130.9, 130.8, 130.7, 130.6, 130.5, 130.4, 130.3, 130.2, 130.1, 130.0, 129.9, 129.8, 129.7, 129.6, 129.5, 129.4, 129.3, 129.2, 129.1, 129.0, 128.9, 128.8, 128.7, 128.6, 128.5, 128.4, 128.3, 128.2, 128.1, 128.0, 127.9, 127.8, 127.7, 127.6, 127.5, 127.4, 127.3, 127.2, 127.1, 127.0, 126.9, 126.8, 126.7, 126.6, 126.5, 126.4, 126.3, 126.2, 126.1, 126.0, 125.9, 125.8, 125.7, 125.6, 125.5, 125.4, 125.3, 125.2, 125.1, 125.0, 124.9, 124.8, 124.7, 124.6, 124.5, 124.4, 124.3, 124.2, 124.1, 124.0, 123.9, 123.8, 123.7, 123.6, 123.5, 123.4, 123.3, 123.2, 123.1, 123.0, 122.9, 122.8, 122.7, 122.6, 122.5, 122.4, 122.3, 122.2, 122.1, 122.0, 121.9, 121.8, 121.7, 121.6, 121.5, 121.4, 121.3, 121.2, 121.1, 121.0, 120.9, 120.8, 120.7, 120.6, 120.5, 120.4, 120.3, 120.2, 120.1, 120.0, 119.9, 119.8, 119.7, 119.6, 119.5, 119.4, 119.3, 119.2, 119.1, 119.0, 118.9, 118.8, 118.7, 118.6, 118.5, 118.4, 118.3, 118.2, 118.1, 118.0, 117.9, 117.8, 117.7, 117.6, 117.5, 117.4, 117.3, 117.2, 117.1, 117.0, 116.9, 116.8, 116.7, 116.6, 116.5, 116.4, 116.3, 116.2, 116.1, 116.0, 115.9, 115.8, 115.7, 115.6, 115.5, 115.4, 115.3, 115.2, 115.1, 115.0, 114.9, 114.8, 114.7, 114.6, 114.5, 114.4, 114.3, 114.2, 114.1, 114.0, 113.9, 113.8, 113.7, 113.6, 113.5, 113.4, 113.3, 113.2, 113.1, 113.0, 112.9, 112.8, 112.7, 112.6, 112.5, 112.4, 112.3, 112.2, 112.1, 112.0, 111.9, 111.8, 111.7, 111.6, 111.5, 111.4, 111.3, 111.2, 111.1, 111.0, 110.9, 110.8, 110.7, 110.6, 110.5, 110.4, 110.3, 110.2, 110.1, 110.0, 109.9, 109.8, 109.7, 109.6, 109.5, 109.4, 109.3, 109.2, 109.1, 109.0, 108.9, 108.8, 108.7, 108.6, 108.5, 108.4, 108.3, 108.2, 108.1, 108.0, 107.9, 107.8, 107.7, 107.6, 107.5, 107.4, 107.3, 107.2, 107.1, 107.0, 106.9, 106.8, 106.7, 106.6, 106.5, 106.4, 106.3, 106.2, 106.1, 106.0, 105.9, 105.8, 105.7, 105.6, 105.5, 105.4, 105.3, 105.2, 105.1, 105.0, 104.9, 104.8, 104.7, 104.6, 104.5, 104.4, 104.3, 104.2, 104.1, 104.0, 103.9, 103.8, 103.7, 103.6, 103.5, 103.4, 103.3, 103.2, 103.1, 103.0, 102.9, 102.8, 102.7, 102.6, 102.5, 102.4, 102.3, 102.2, 102.1, 102.0, 101.9, 101.8, 101.7, 101.6, 101.5, 101.4, 101.3, 101.2, 101.1, 101.0, 100.9, 100.8, 100.7, 100.6, 100.5, 100.4, 100.3, 100.2, 100.1, 100.0, 99.9, 99.8, 99.7, 99.6, 99.5, 99.4, 99.3, 99.2, 99.1, 99.0, 98.9, 98.8, 98.7, 98.6, 98.5, 98.4, 98.3, 98.2, 98.1, 98.0, 97.9, 97.8, 97.7, 97.6, 97.5, 97.4, 97.3, 97.2, 97.1, 97.0, 96.9, 96.8, 96.7, 96.6, 96.5, 96.4, 96.3, 96.2, 96.1, 96.0, 95.9, 95.8, 95.7, 95.6, 95.5, 95.4, 95.3, 95.2, 95.1, 95.0, 94.9, 94.8, 94.7, 94.6, 94.5, 94.4, 94.3, 94.2, 94.1, 94.0, 93.9, 93.8, 93.7, 93.6, 93.5, 93.4, 93.3, 93.2, 93.1, 93.0, 92.9, 92.8, 92.7, 92.6, 92.5, 92.4, 92.3, 92.2, 92.1, 92.0, 91.9, 91.8, 91.7, 91.6, 91.5, 91.4, 91.3, 91.2, 91.1, 91.0, 90.9, 90.8, 90.7, 90.6, 90.5, 90.4, 90.3, 90.2, 90.1, 90.0, 89.9, 89.8, 89.7, 89.6, 89.5, 89.4, 89.3, 89.2, 89.1, 89.0, 88.9, 88.8, 88.7, 88.6, 88.5, 88.4, 88.3, 88.2, 88.1, 88.0, 87.9, 87.8, 87.7, 87.6, 87.5, 87.4, 87.3, 87.2, 87.1, 87.0, 86.9, 86.8, 86.7, 86.6, 86.5, 86.4, 86.3, 86.2, 86.1, 86.0, 85.9, 85.8, 85.7, 85.6, 85.5, 85.4, 85.3, 85.2, 85.1, 85.0, 84.9, 84.8, 84.7, 84.6, 84.5, 84.4, 84.3, 84.2, 84.1, 84.0, 83.9, 83.8, 83.7, 83.6, 83.5, 83.4, 83.3, 83.2, 83.1, 83.0, 82.9, 82.8, 82.7, 82.6, 82.5, 82.4, 82.3, 82.2, 82.1, 82.0, 81.9, 81.8, 81.7, 81.6, 81.5, 81.4, 81.3, 81.2, 81.1, 81.0, 80.9, 80.8, 80.7, 80.6, 80.5, 80.4, 80.3, 80.2, 80.1, 80.0, 79.9, 79.8, 79.7, 79.6, 79.5, 79.4, 79.3, 79.2, 79.1, 79.0, 78.9, 78.8, 78.7, 78.6, 78.5, 78.4, 78.3, 78.2, 78.1, 78.0, 77.9, 77.8, 77.7, 77.6, 77.5, 77.4, 77.3, 77.2, 77.1, 77.0, 76.9, 76.8, 76.7, 76.6, 76.5, 76.4, 76.3, 76.2, 76.1, 76.0, 75.9, 75.8, 75.7, 75.6, 75.5, 75.4, 75.3, 75.2, 75.1, 75.0, 74.9, 74.8, 74.7, 74.6, 74.5, 74.4, 74.3,

SpinWorks 4: BS 08 322  
 PROTON CDCl3 /opt/topspin3.5pl2/nmrdata nmrsu 18

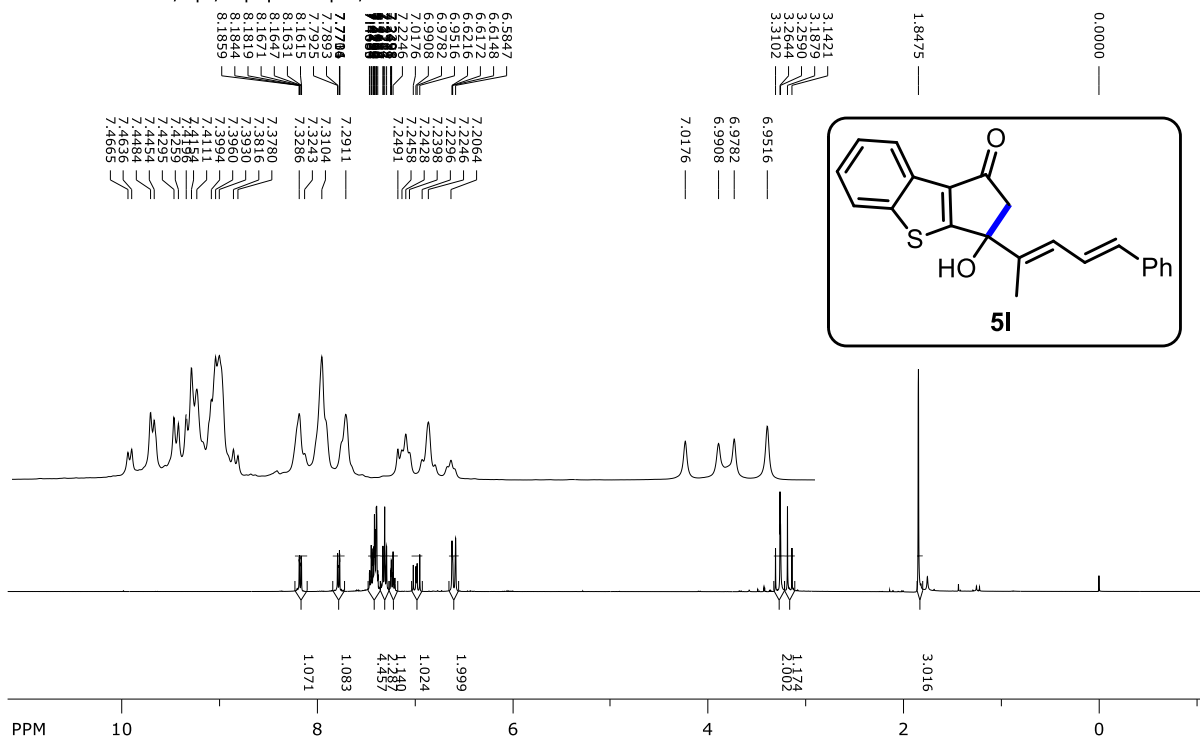

SpinWorks 4: BS 08 322  
 C13CPD256 CDCl3 /opt/topspin3.5pl2/nmrdata nmrsu 18

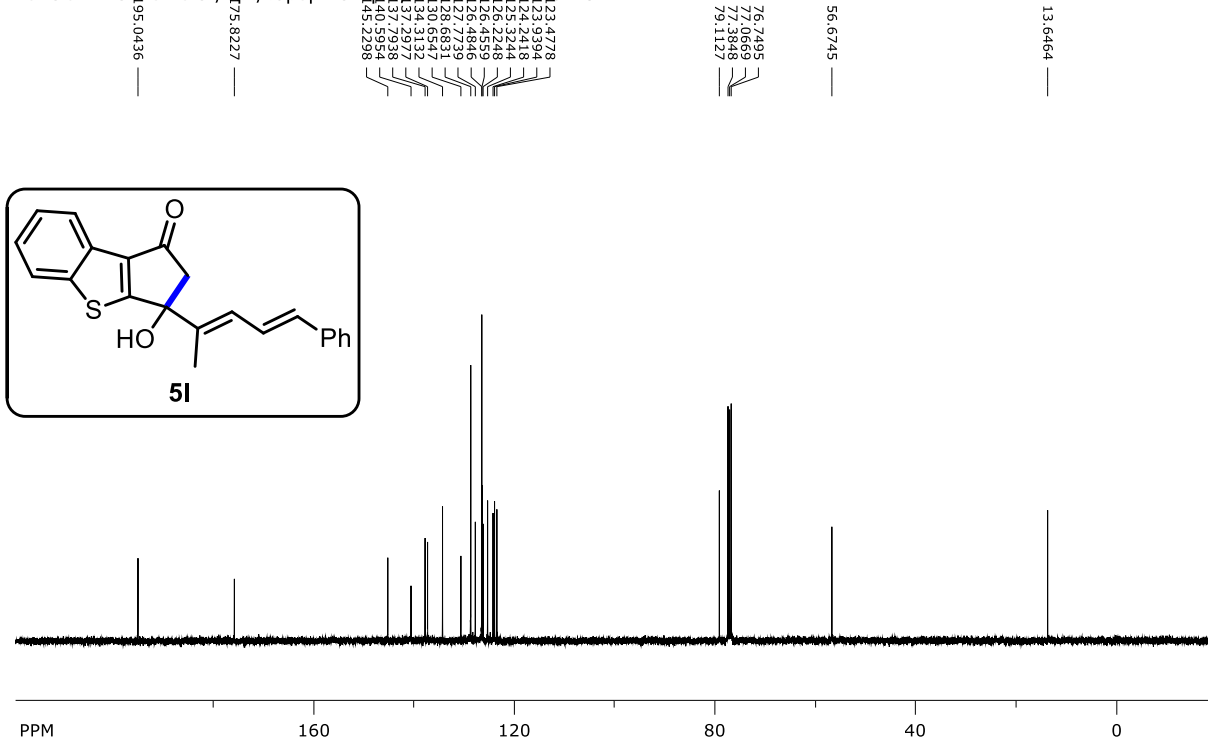

SpinWorks 4: BS-09-05-Re

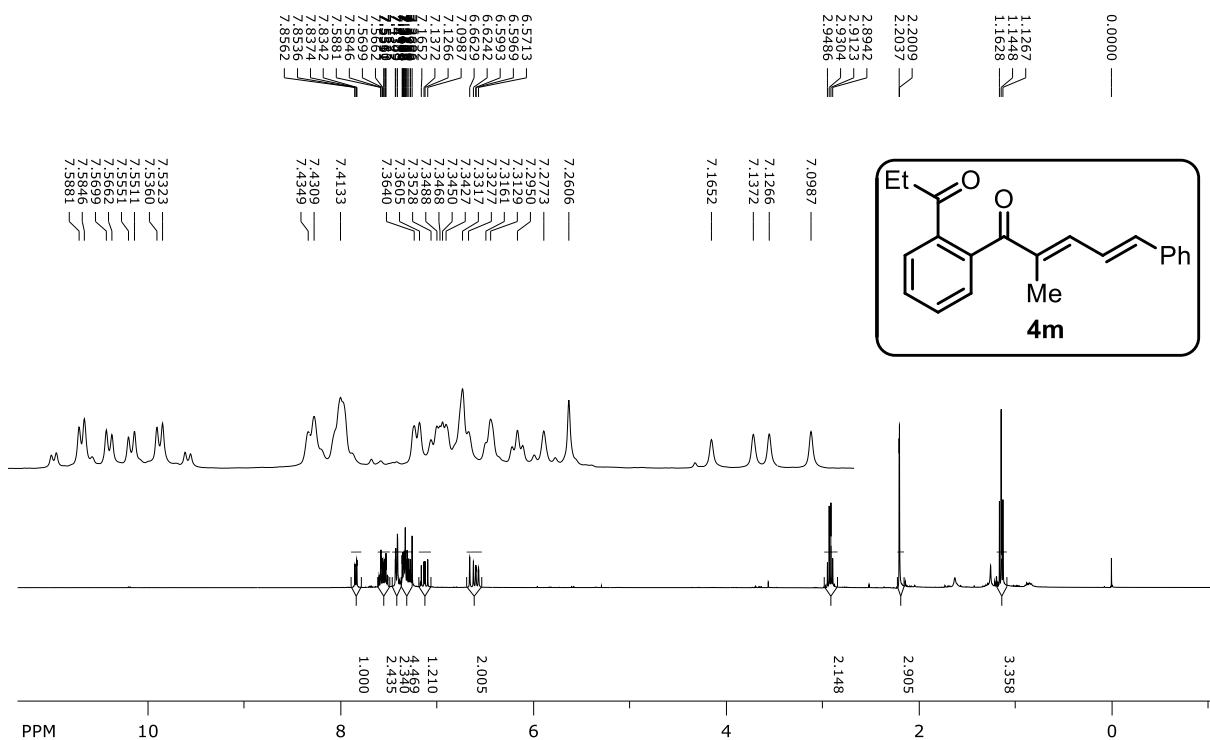

SpinWorks 4: BS 09 05  
C13CPD256 CDCl3 /opt/topspin3.5/p2/nmrdata/nmr su 13

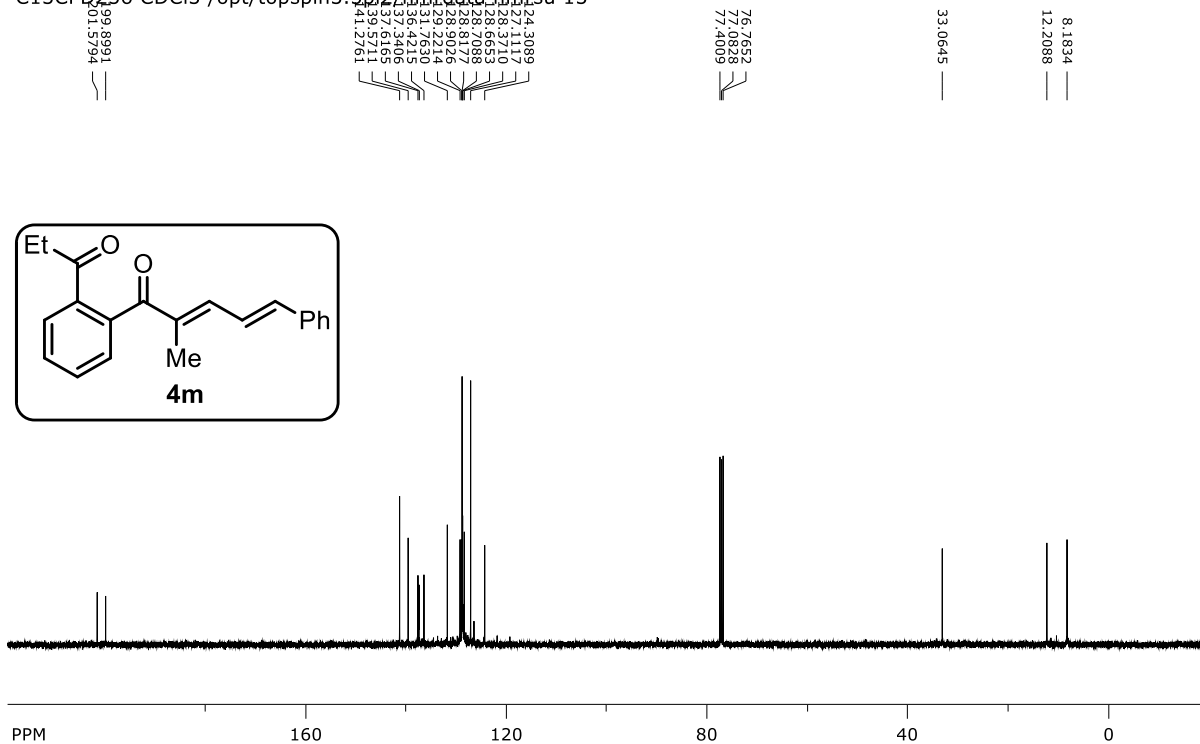

[illegible][illegible]

SpinWorks 4: BS-09-25

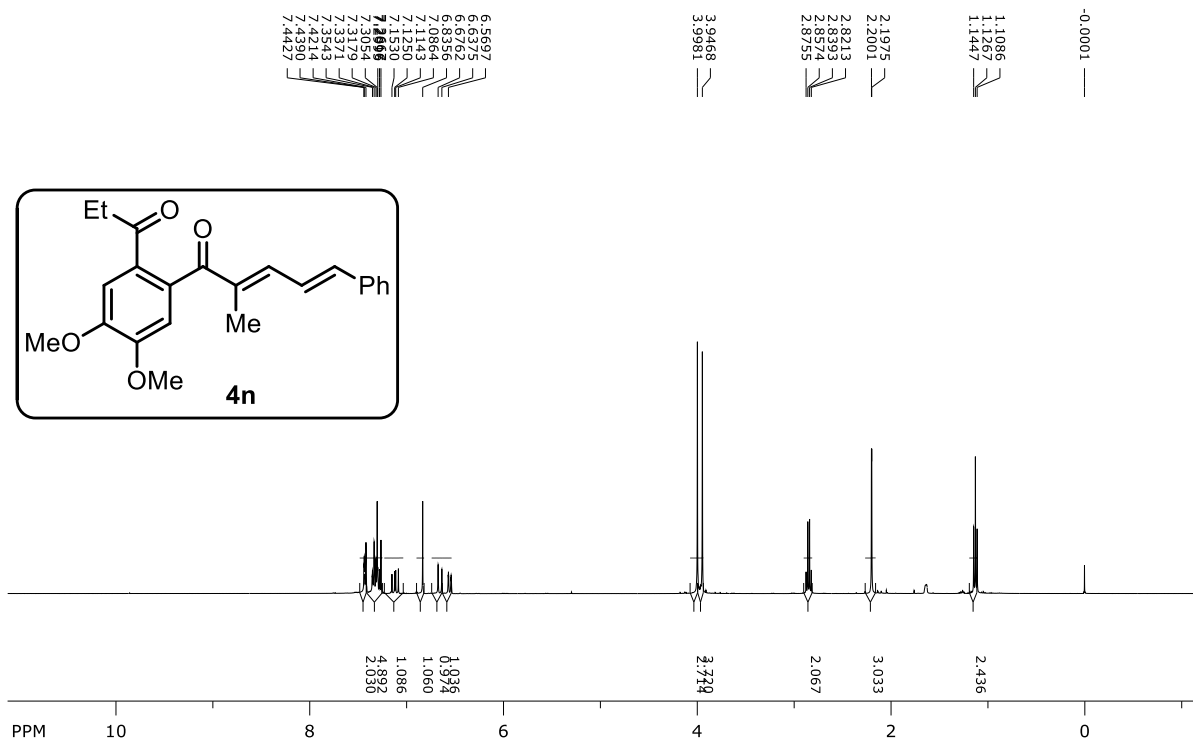

SpinWorks 4: BS 09 25

C13CPD256 CDCl3 /opt/topspin3.5pl2/nmrdata.pmrslu 51

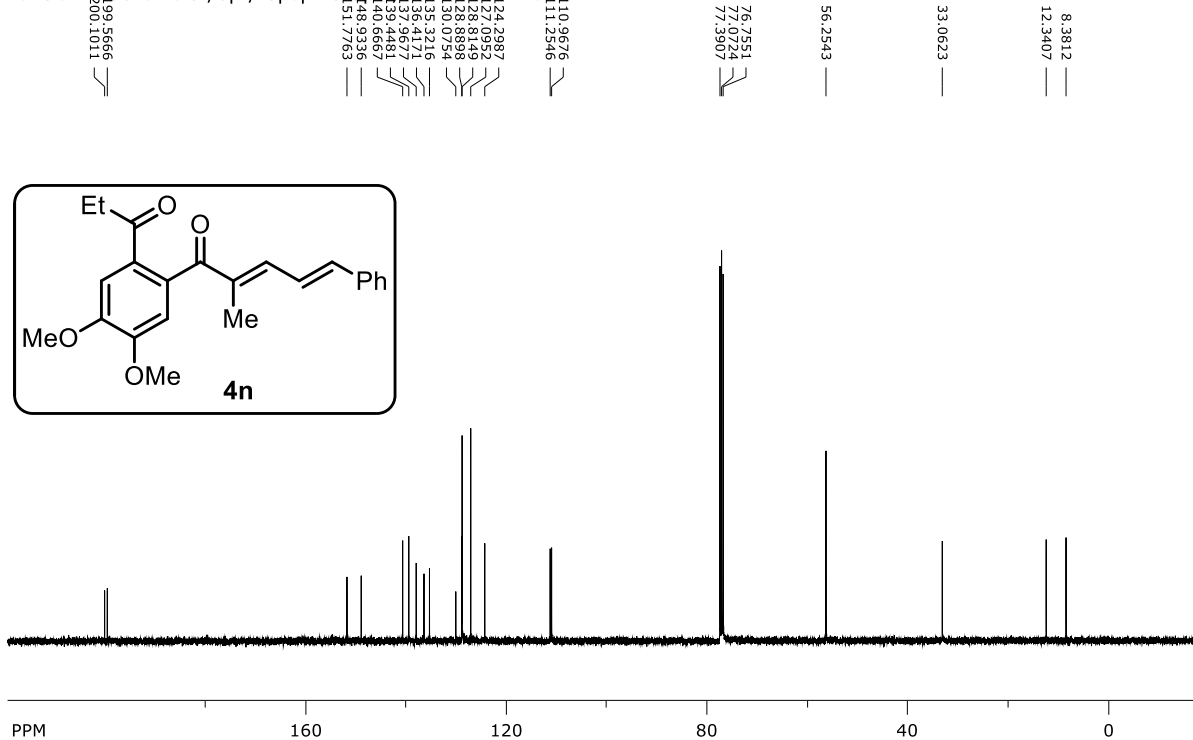



SpinWorks 4: BS-09-26

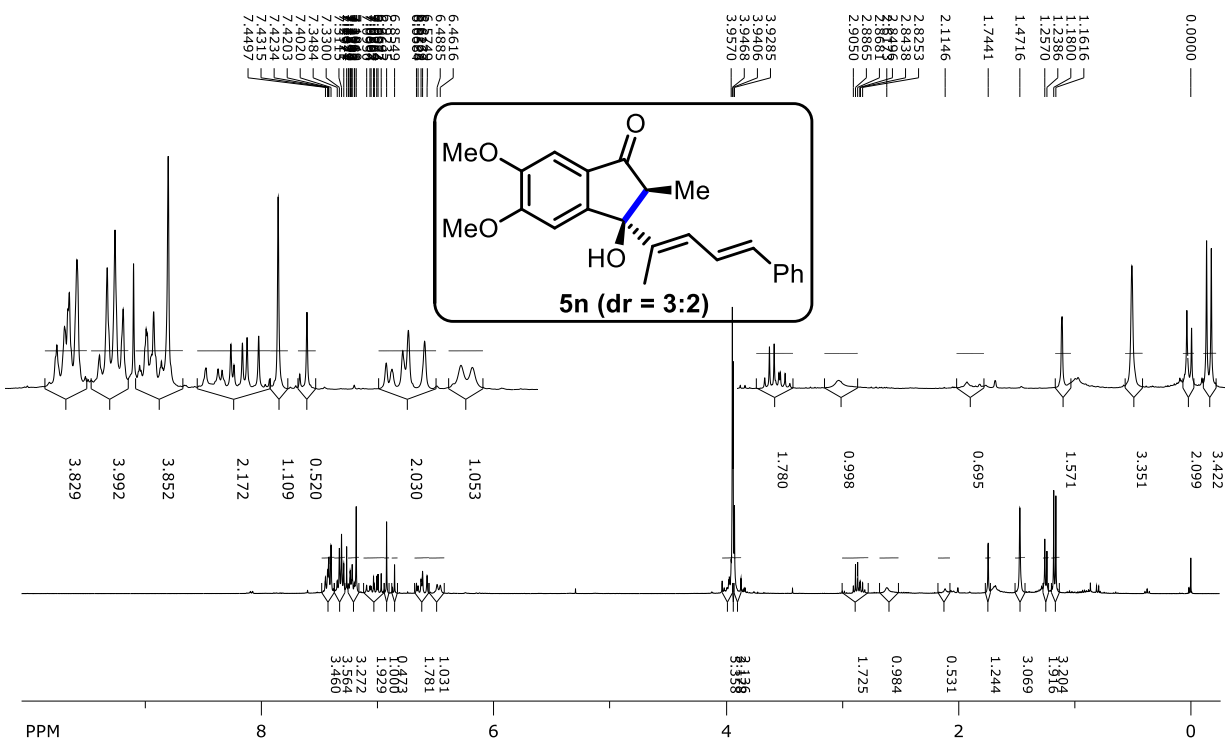

SpinWorks 4: BS 09 26

C13CPD256 CDCl3 /opt/topspin3.5pl2/nmrdata.pmr su 12

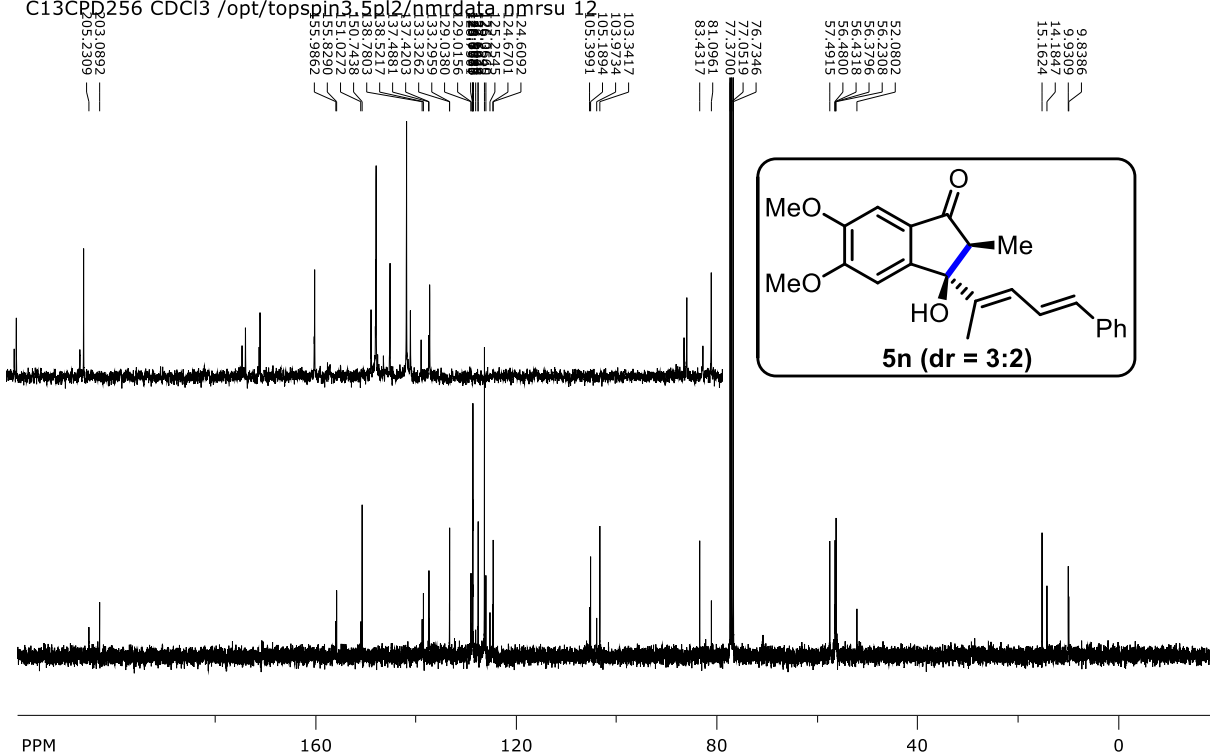



SpinWorks 4: BS-09-27

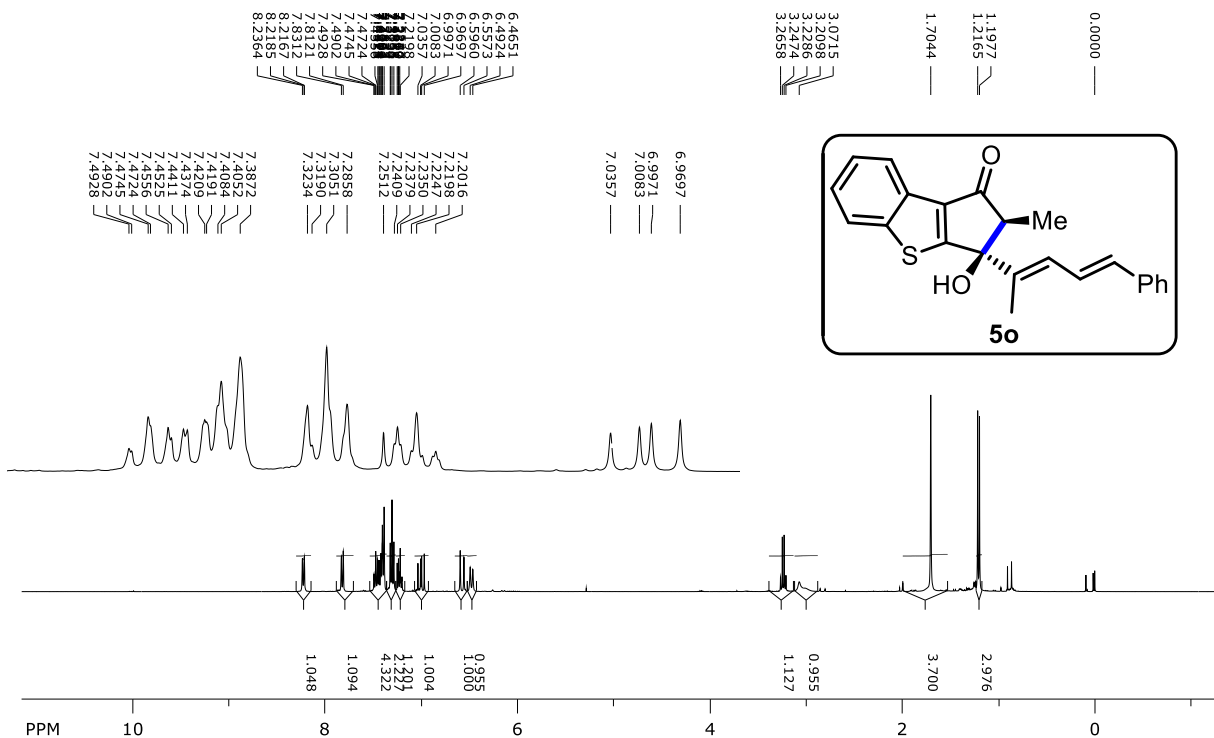

Supplement: c8ob03106a1.pdf [file c8ob03106a1.pdf]
